# Supplementary material
Source: PubMed Central journal article supplement (PMC4353017)

# Four-step Synthesis of the Antimalarial Cardamom Peroxide via an Oxygen Stitching Strategy

## Supporting Information

Xirui Hu and Thomas J. Maimone\*

*Department of Chemistry, University of California, Berkeley, Berkeley, CA, 94720*

*maimone@berkeley.edu*

### Table of Contents:

|                                                                    |     |
|--------------------------------------------------------------------|-----|
| General Procedures.....                                            | S2  |
| Triene <b>5</b> .....                                              | S3  |
| Dienone <b>7</b> .....                                             | S3  |
| Bisenone <b>8</b> .....                                            | S4  |
| Cardamom peroxide <b>2</b> .....                                   | S5  |
| Hydration product <b>9</b> .....                                   | S5  |
| Diol <b>10</b> .....                                               | S6  |
| Reductive Activation of <b>2</b> : Synthesis of <b>11-13</b> ..... | S6  |
| X-Ray crystallographic Analysis <b>2</b> .....                     | S8  |
| X-Ray crystallographic Analysis <b>3</b> .....                     | S16 |
| X-Ray crystallographic Analysis <b>11</b> .....                    | S24 |
| X-Ray crystallographic Analysis <b>13</b> .....                    | S37 |
| NMR spectra.....                                                   | S45 |

## General Procedures

Unless otherwise stated, all reactions were performed in oven-dried or flame-dried glassware under an atmosphere of dry nitrogen or argon. Dry tetrahydrofuran (THF), dichloromethane, toluene, hexane, acetonitrile, and diethyl ether were obtained by passing these previously degassed solvents through activated alumina columns. Amines and alcohols were distilled from calcium hydride prior to use. 1,2-Dimethoxyethane (DME) was distilled from sodium and benzophenone.  $\text{TiCl}_4$  was distilled prior to use. (1*R*)-(-)-Myrtenal was purchased from Sigma Aldrich and used directly without further purification. Reactions were monitored by thin layer chromatography (TLC) on Silicycle Siliaplate<sup>TM</sup> G TLC plates (250  $\mu\text{m}$  thickness, 60 Å porosity, F-254 indicator) and visualized by UV irradiation and staining with *p*-anisaldehyde, phosphomolybdic acid, or potassium permanganate developing agents. Volatile solvents were removed under reduced pressure using a rotary evaporator. Flash column chromatography was performed using Silicycle F60 silica gel (60Å, 230-400 mesh, 40-63  $\mu\text{m}$ ). Proton nuclear magnetic resonance (<sup>1</sup>H NMR) and carbon nuclear magnetic resonance (<sup>13</sup>C NMR) spectra were recorded on Bruker AVQ-400, AV-500, or AV-600 spectrometers operating respectively at 400, 500, and 600 MHz for <sup>1</sup>H, and 100, 125, and 150 MHz for <sup>13</sup>C. Chemical shifts are reported in parts per million (ppm) with respect to the residual solvent signal  $\text{CDCl}_3$  (<sup>1</sup>H NMR:  $\delta = 7.26$ ; <sup>13</sup>C NMR:  $\delta = 77.16$ ). Peak multiplicities are reported as follows: s = singlet, bs = broad singlet, d = doublet, t = triplet, dd = doublet of doublets, td = triplet of doublets, m = multiplet. app = apparent. Melting points were determined using MEI-TEMP<sup>TM</sup> apparatus and are uncorrected. IR spectra were recorded on a Nicolet 380 FT-IR spectrometer. High-resolution mass spectra (HRMS) were obtained by the qb3 mass spectrometry facility at the University of California, Berkeley. X-ray crystallographic analyses were performed at the UC-Berkeley College of Chemistry X-ray crystallography facility.

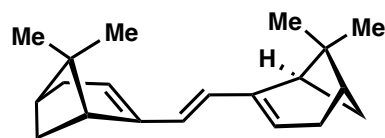

**Triene 5.** The procedure was adapted from previous conditions reported by McMurry and co-workers (*J. Org. Chem.* **1978**, *43*, 3255.)

A flame-dried 1 L three-necked flask equipped with a large stir bar and reflux condenser was charged with freshly prepared Zn-Cu couple (44 g, 0.67 mol, 40 equiv). The system was evacuated and backfilled with argon three times. DME (600 mL) was added, followed by the dropwise addition of freshly distilled  $\text{TiCl}_4$  (24 ml, 200 mmol, 10 equiv.) to the rapidly stirring slurry. After 1 hour of sonication, the mixture was heated to reflux for 5 hours, cooled to room temperature, and a solution of myrtenal (3.0 g, 20 mmol, 1 equiv) in 50 mL of degassed DME was added slowly over 12 hours via syringe pump. After 1 hour of additional sonication, the reaction mixture was heated at reflux for 48 hours, cooled to room temperature, and filtered through a pad of Florisil® and eluted with diethyl ether. This filtration was repeated to give a clear solution that was concentrated *in vacuo* and purified by flash column chromatography (200:1 hexanes: $\text{Et}_3\text{N}$ ) affording **5** (1.41 g, 53 % yield) as colorless oil:  $[\alpha]_D^{20} = +31.70^\circ$  (c 0.010 g/mL,  $\text{CHCl}_3$ );  $^1\text{H NMR}$  (500 MHz,  $\text{CDCl}_3$ )  $\delta$  6.14 (s, 2H), 5.53 (m, 2H), 2.62 (ddd,  $J = 5.7, 5.7, 1.6$  Hz, 2H), 2.42 (ddd,  $J = 8.8, 5.7, 5.7$  Hz, 2H), 2.39 (ddd,  $J = 19.2, 3.0, 3.0$  Hz, 2H), 2.32 (ddd,  $J = 19.2, 2.7, 2.7$  Hz, 2H), 2.12 (m, 2H), 1.33 (s, 6H), 1.13 (d,  $J = 8.8$  Hz, 2H), 0.81 (s, 6H);  $^{13}\text{C NMR}$  (150 MHz,  $\text{CDCl}_3$ )  $\delta$  146.9, 126.4, 123.7, 41.3, 41.2, 37.9, 32.2, 31.6, 26.6, 21.0; IR (thin film,  $\text{cm}^{-1}$ ) 2931, 2360, 1705, 1650, 1628, 1369, 1331; HRMS (EI) calcd. for  $[\text{C}_{20}\text{H}_{28}]$ :  $m/z$  268.2191, found 268.2191.

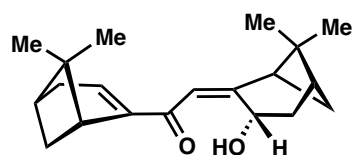

**Dienone 7.** A flame-dried round bottom flask was charged with triene **5** (1.3 g, 4.84 mmol, 1 equiv) and DCM (145 ml). The solution was cooled to  $-40^\circ\text{C}$  and methylene blue (15 mg, 0.05 mmol, 0.01 equiv) in DCM (1 mL) added. Oxygen gas was vigorously bubbled through the solution while irradiated by a 500W halogen lamp. After 1 hour, a second portion of methylene blue (15 mg) in DCM (1 mL) was added and the reaction continued until TLC indicated complete consumption of starting material (~2 hour). Nitrogen was then bubbled through the solution for 30 minutes at which point DBU (3.7 mL, 24 mmol, 5 equiv) was added dropwise at -

40 °C. The resulting mixture was allowed to gradually warm to -20 °C and stirred for an additional 4 hours at this temperature. The reaction mixture was quenched by the additions of 1 N HCl (100 mL) and extracted by DCM (3 X 75 mL). The combined organic layers were washed with sat. NaHCO<sub>3</sub>, H<sub>2</sub>O, and brine, dried over MgSO<sub>4</sub>, and concentrated *in vacuo*. The crude material was purified by column chromatography (gradient 20:1 → 10:1 hexanes/ethyl acetate) to afford **7** (816 mg, 56 %) as white solid: mp 118.4 – 119.6 °C;  $[\alpha]_D^{20} = +246.02^\circ$  (c 0.005 g/ml, CHCl<sub>3</sub>); <sup>1</sup>H NMR (500 MHz, CDCl<sub>3</sub>) δ 6.76 (dddd, *J* = 3.3, 3.3, 1.5, 1.5 Hz, 1H), 6.40 (d, *J* = 0.8 Hz, 1H), 5.11 (d, *J* = 3.0 Hz, 1H, D<sub>2</sub>O exchangeable), 4.66 – 4.62 (m, 1H), 2.94 (ddd, *J* = 5.7, 5.7, 1.5 Hz, 1H), 2.56 – 2.50 (m, 2H), 2.49 – 2.40 (m, 3H), 2.38 – 2.31 (m, 1H), 2.16 – 2.11 (m, 1H), 2.07 (dddd, *J* = 6.0, 6.0, 6.0, 2.2 Hz, 1H), 1.95 (dd, *J* = 14.6, 3.6 Hz, 1H), 1.72 (d, *J* = 10.0 Hz, 1H), 1.34 (s, 3H), 1.31 (s, 3H), 1.07 (d, *J* = 9.2 Hz, 1H), 0.75 (s, 3H), 0.69 (s, 3H); <sup>13</sup>C NMR (125 MHz, CDCl<sub>3</sub>) δ 191.2, 168.3, 150.6, 137.3, 120.4, 62.9, 53.5, 40.8, 40.3, 40.2, 40.0, 37.5, 33.8, 32.7, 31.2, 27.4, 26.0, 25.9, 22.7, 21.0; IR (thin film, cm<sup>-1</sup>) 3421, 2916, 1636, 1591, 1393, 1366; HRMS (EI) calcd. for [C<sub>20</sub>H<sub>28</sub>O<sub>2</sub>]: *m/z* 300.2089, found 300.2094.

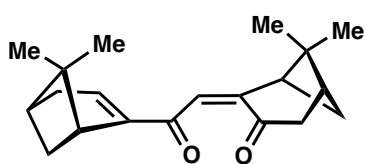

**Dienedione 8.** Dienone **7** (816 mg, 2.72 mmol, 1.0 equiv) was dissolved in DCM (27 mL) and NaHCO<sub>3</sub> (228 mg, 2.72 mmol, 1.0 equiv) and the Dess-Martin periodinane (1.5 g, 3.54 mmol, 1.3 equiv) were added sequentially. The resulting mixture was stirred

at room temperature for 1 h (monitored by TLC for complete consumption of **7**). The reaction was quenched by the addition of 1 N NaOH (10 mL) and extracted with DCM (3 X 50 mL). The combined organic phases were washed with water and brine, dried over MgSO<sub>4</sub>, and purified by flash column chromatography (gradient 20:1 → 10:1 hexanes/ethyl acetate), affording **10** (770 mg, 95 %) as white solid: mp 137.1 – 138.4 °C;  $[\alpha]_D^{20} +27.20^\circ$  (c 0.005 g/ml, CHCl<sub>3</sub>); <sup>1</sup>H NMR (500 MHz, CDCl<sub>3</sub>) δ 6.55 (ddd, *J* = 3.4, 1.8, 1.8 Hz, 1H), 6.00 (s, 1H), 3.05 (dd, *J* = 5.5, 5.5 Hz, 1H), 2.77 – 2.68 (m, 2H), 2.64 (ddd, *J* = 19.2, 2.4, 2.4 Hz, 1H), 2.54 – 2.41 (m, 3H), 2.39 (ddd, *J* = 19.9, 2.9, 2.9 Hz, 1H), 2.21 (dddd, *J* = 6.1, 6.1, 2.8, 2.8 Hz, 1H), 2.15 – 2.10 (m, 1H), 1.42 (dd, *J* = 2.9, 2.9 Hz, 1H), 1.40 (s, 3H), 1.35 (s, 3H), 1.08 (d, *J* = 9.1 Hz, 1H), 0.91 (s, 3H), 0.81 (s, 3H); <sup>13</sup>C NMR (125 MHz, CDCl<sub>3</sub>) δ 198.4, 195.0, 149.7, 145.0, 138.3, 132.8, 48.9, 42.6, 41.3, 40.8, 39.3, 38.4, 37.9, 32.7, 32.3, 31.2, 26.0, 26.0, 22.0, 21.0; IR (thin film, cm<sup>-1</sup>) 2931, 1705, 1651, 1628, 1465, 1421, 1368; HRMS (EI) calcd. for [C<sub>20</sub>H<sub>26</sub>O<sub>2</sub>]: *m/z* 298.1933, found 298.1937.

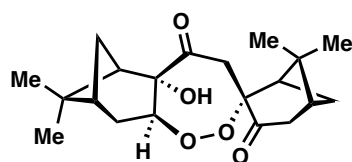

**Cardamom Peroxide (2):** A flame-dried round bottom flask was charged with dienedione **8** (30 mg, 0.1 mmol, 1.0 equiv), Mn(dpm)<sub>3</sub> (12 mg, 0.02 mmol, 20 mol %), DCM (1.6 mL), and *i*PrOH (0.4 mL). Oxygen was vigorously bubbled through the solution for 5 minutes, followed by the addition of TBHP (5M in decane, 30  $\mu$ L, 1.5 equiv). The solution was cooled to -10  $^{\circ}$ C under an atmosphere of oxygen, and PhSiH<sub>3</sub> (30  $\mu$ L, 0.24 mmol, 2.4 equiv) in DCM (1 mL) was added dropwise over 12 h via syringe pump. After the addition was complete, a solution of triphenylphosphine (56 mg, 0.21 mmol) in DCM was added dropwise at -10  $^{\circ}$ C to quench intermediate diperoxide **3**. The reaction mixture was diluted with H<sub>2</sub>O (5 mL) and extracted with DCM (3 x 10 mL). The combined organic layers were washed with brine, dried over Na<sub>2</sub>SO<sub>4</sub>, filtered through Celite®, and concentrated *in vacuo*. The crude mixture was purified by flash column chromatography (DCM) to afford the cardamom peroxide **2** (18.2 mg, 52 %) as a white solid along with hydration product **9** (3.5 mg, 11%), diol **10** (4.4 mg, 13%), and nopinone (9% GC yield using an internal standard of dodecane). [Note: the reaction afforded 48% of **2** on a 150 mg scale].

**Cardamom peroxide (2):** white solid: mp 154.9 – 156.2  $^{\circ}$ C;  $[\alpha]_D^{20}$  +123.20 $^{\circ}$  (c 0.005 g/ml, hexanes); <sup>1</sup>H NMR (500 MHz, CDCl<sub>3</sub>)  $\delta$  4.28 (s, 1H), 4.22 (d, *J* = 11.3 Hz, 1H), 4.18 (d, *J* = 8.7 Hz, 1H), 2.78 (dd, *J* = 18.9, 2.4 Hz, 1H), 2.69 (ddd, *J* = 18.9, 3.0, 3.0 Hz, 1H), 2.58 (dd, *J* = 15.4, 8.9 Hz, 1H), 2.46 (dddd, *J* = 11.0, 5.8, 2.9, 2.9 Hz, 2H), 2.40 (d, *J* = 11.2 Hz, 1H), 2.41 – 2.35 (m, 1H), 2.30 (dd, *J* = 6.1, 6.1 Hz, 1H), 2.15 – 2.05 (m, 2H), 1.97 – 1.92 (m, 1H), 1.84 – 1.74 (m, 2H), 1.69 (d, *J* = 11.2 Hz, 1H), 1.38 (s, 3H), 1.27 (s, 3H), 1.06 (s, 3H), 0.86 (s, 3H); <sup>13</sup>C NMR (100 MHz, CDCl<sub>3</sub>)  $\delta$  208.8, 204.5, 84.3, 84.2, 83.3, 49.6, 43.9, 43.3, 42.9, 41.0, 40.7, 39.0, 38.3, 30.7, 27.9, 27.5, 26.9, 26.6, 24.1, 22.5; IR (thin film, cm<sup>-1</sup>) 3447, 3021, 2909, 1722, 1692, 1441, 1406, 1371; HRMS (ESI) calcd. for [C<sub>20</sub>H<sub>28</sub>O<sub>5</sub>Na]<sup>+</sup> (M+Na)<sup>+</sup>: *m/z* 371.1829, found 371.1837.

Vapor diffusion of an ether solution of **2** with pentane afforded X-ray quality crystals.

**Hydration product 9:** colorless oil;  $[\alpha]_D^{20}$  = -56.7 $^{\circ}$  (c 0.006 g/ml, CHCl<sub>3</sub>); <sup>1</sup>H NMR (500 MHz, CDCl<sub>3</sub>)  $\delta$  6.70 (ddd, *J* = 3.4, 1.8, 1.8 Hz, 1H), 3.38 (d, *J* = 15.7 Hz, 1H), 2.99 (ddd, *J* = 5.7, 5.7, 1.6 Hz, 1H), 2.68 (dd, *J* = 19.0, 2.4 Hz, 1H), 2.59 (ddd, *J* = 19.0, 3.2, 3.2 Hz, 1H), 2.53 (dt, *J* = 20.2, 3.2, 3.2 Hz, 1H), 2.50 – 2.41 (m, 3H), 2.39 (d, *J* = 15.8 Hz, 1H), 2.22 (dd, *J* = 6.2, 6.2 Hz, 1H), 2.15 (dddd, *J* = 5.9, 3.0, 3.0, 1.2 Hz, 1H), 2.11 (dddd, *J* = 6.1, 6.1, 3.0, 3.0 Hz, 1H), 1.92 (d,

$J = 11.0$  Hz, 1H), 1.36 (s, 3H), 1.35 (s, 3H), 1.02 (d,  $J = 9.1$  Hz, 1H), 0.95 (s, 3H), 0.82 (s, 3H);  $^{13}\text{C}$  NMR (100 MHz,  $\text{CDCl}_3$ )  $\delta$  210.6, 200.6, 150.4, 138.8, 79.8, 50.0, 43.3, 40.4, 40.3, 39.6, 39.3, 38.6, 37.6, 32.9, 31.2, 27.9, 27.4, 26.0, 22.9, 21.0; IR (thin film,  $\text{cm}^{-1}$ ) 3359, 2924, 1721, 1640, 1613, 1421, 1370; HRMS (EI) calcd. for  $[\text{C}_{20}\text{H}_{28}\text{O}_3]$ :  $m/z$  316.2038, found 316.2040.

**Diol 10**: white solid (acid sensitive): mp 132.9 – 134.1 °C;  $[\alpha]_D^{20}$   $-33.2^\circ$  (c 0.010 g/ml,  $\text{CH}_2\text{Cl}_2$ );  $^1\text{H}$  NMR (600 MHz,  $\text{CD}_2\text{Cl}_2$ )  $\delta$  5.49 (s, 1H), 3.37 (d,  $J = 15.3$  Hz, 1H), 2.78 (ddd,  $J = 15.8, 10.5, 3.5$  Hz, 1H), 2.69 – 2.62 (m, 2H), 2.57 (ddd,  $J = 19.1, 3.2, 3.2$  Hz, 1H), 2.41 (dddd,  $J = 11.0, 6.2, 6.2, 3.1$  Hz, 1H), 2.26 (dddd,  $J = 10.1, 6.0, 6.0, 1.8$  Hz, 1H), 2.21 (dd,  $J = 6.1, 4.8$  Hz, 1H), 2.18 – 2.14 (m, 2H), 2.08 (dddd,  $J = 6.1, 6.1, 2.9, 2.9$  Hz, 1H), 1.99 – 1.90 (m, 2H), 1.85 (d,  $J = 10.9$  Hz, 1H), 1.87 – 1.81 (m, 1H), 1.61 (ddd,  $J = 16.0, 11.0, 5.2$  Hz, 1H), 1.58 (d,  $J = 10.1$  Hz, 1H), 1.35 (s, 3H), 1.22 (s, 3H), 0.90 (s, 3H), 0.72 (s, 3H);  $^{13}\text{C}$  NMR (150 MHz,  $\text{CD}_2\text{Cl}_2$ )  $\delta$  213.2, 213.1, 82.5, 80.4, 50.7, 49.0, 43.6, 41.7, 41.1, 39.7, 39.0, 38.3, 28.0, 27.5, 27.3, 26.2, 24.6, 24.3, 22.8, 22.0; IR (thin film,  $\text{cm}^{-1}$ ) 3410, 3005, 2925, 2360, 2341, 1823, 1708, 1463, 1408, 1326; HRMS (ESI) calcd. for  $[\text{C}_{20}\text{H}_{30}\text{O}_4\text{Na}]^+$  ( $\text{M}+\text{Na}$ ) $^+$ :  $m/z$  357.2036, found 357.2035.

### Reductive activation of 2:

In a nitrogen-filled glovebox, **2** (12 mg, 0.03 mmol, 1.0 equiv) was dissolved in thoroughly degassed acetonitrile (750  $\mu\text{L}$ ) and  $\text{H}_2\text{O}$  (7  $\mu\text{L}$ , 0.4 mmol, 13.0 equiv). To the resulting solution was added  $\text{FeCl}_2$  (3.5 mg, 0.028 mmol, 0.8 equiv) in one portion and the resulting mixture stirred for 45 minutes. After 45 minutes, the resulting red colored solution was removed from the glovebox, opened to the air, diluted with DCM (15 mL) and washed with brine (2 X 25 mL). The organic phase was concentrated *in vacuo* and the crude material purified by preparative thin layer chromatography (50:6 DCM:MeOH) affording acids **11** (5 mg, yield 42 %), **12** (2.5 mg, yield 20 %), and small amount of **13** (~ 0.5 – 1.0 mg, 5 – 10 %).

**Acid 11**: white solid: mp 147.5 – 149.8 °C;  $[\alpha]_D^{20}$   $+77.50^\circ$  (c 0.002 g/ml,  $\text{CH}_2\text{Cl}_2$ );  $^1\text{H}$  NMR (600 MHz,  $\text{CDCl}_3$ )  $\delta$  5.30 (s, 1H), 4.50 (dd,  $J = 9.7, 4.3$  Hz, 1H), 2.95 (dd,  $J = 10.6, 7.7$  Hz, 1H), 2.73 (dddd,  $J = 14.8, 9.8, 2.8, 2.8$  Hz, 1H), 2.49 (dddd,  $J = 10.3, 7.8, 7.8, 7.7$  Hz, 1H), 2.43 (dd,  $J = 15.8, 7.2$  Hz, 1H), 2.34 (dd,  $J = 15.8, 8.0$  Hz, 1H), 2.30 (ddd,  $J = 11.3, 7.8, 7.8$  Hz, 1H), 2.26 (dddd,  $J = 11.9, 6.2, 3.0, 3.0, 2.3$  Hz, 1H), 2.15 (d,  $J = 11.3$  Hz, 1H), 2.03 – 1.97 (m, 2H), 1.83 – 1.74 (m, 2H), 1.27 (s, 3H), 1.25 (s, 3H), 1.03 (s, 3H), 0.93 (s, 3H);  $^{13}\text{C}$  NMR (125 MHz,  $\text{CDCl}_3$ )  $\delta$  206.0, 192.5, 176.9, 102.8, 96.5, 67.9, 50.0, 44.3, 43.4, 39.9, 39.5, 38.7, 38.6, 34.8,

30.4, 26.8, 25.5, 24.4, 23.6, 17.5; IR (thin film,  $\text{cm}^{-1}$ ) 3849, 3105, 2997, 2924, 2361, 1682, 1587, 1484, 1368; HRMS (ESI) calcd. for  $[\text{C}_{20}\text{H}_{27}\text{O}_5]^-$  (M - H) $^-$  :  $m/z$  347.1864, found 347.1861.

Vapor diffusion of an ether solution of **11** with pentane afforded X-ray quality crystals.

**Acid 13**: white solid: mp 154.3 – 156.0 °C;  $^1\text{H}$  NMR (600 MHz,  $\text{CD}_2\text{Cl}_2$ )  $\delta$  5.27 (s, 1H), 4.98 (dd,  $J = 9.1, 3.9$  Hz, 1H), 2.77 – 2.71 (m, 1H), 2.71 (dd,  $J = 10.8, 7.6$  Hz, 1H), 2.43 – 2.35 (m, 2H), 2.34 – 2.25 (m, 2H), 2.22 (dd,  $J = 5.8, 5.8$  Hz, 1H), 2.14 (ddd,  $J = 11.0, 7.5, 7.5$  Hz, 1H), 1.99 (dddd,  $J = 5.7, 5.7, 3.3, 3.3$  Hz, 1H), 1.90 (ddd,  $J = 14.6, 3.8, 3.8$  Hz, 1H), 1.79 (dd,  $J = 10.6, 10.6$  Hz, 1H), 1.27 (s, 3H), 1.22 (s, 3H), 1.10 (ddd,  $J = 6.1, 3.8, 3.8$  Hz, 1H), 1.05 (s, 3H), 0.95 (s, 3H); IR (thin film,  $\text{cm}^{-1}$ ) 3457, 2997, 2923, 2667, 2365, 1677, 1591, 1367; HRMS (ESI) calcd. for  $[\text{C}_{20}\text{H}_{27}\text{O}_5]^-$  (M - H) $^-$  :  $m/z$  347.1864, found 347.1863.

Vapor diffusion of an ether solution of **13** with pentane afforded X-ray quality crystals.

**Acid 12**: white foam (unstable over extended periods in  $\text{CDCl}_3$ , converts to **11** and **13**);  $[\alpha]_D^{20} +48.0^\circ$  (c 0.001 g/ml,  $\text{CH}_2\text{Cl}_2$ );  $^1\text{H}$  NMR (600 MHz,  $\text{CD}_2\text{Cl}_2$ )  $\delta$  5.25 (d,  $J = 0.8$  Hz, 1H), 4.48 – 4.40 (m, 1H), 2.98 (ddd,  $J = 10.4, 7.6, 0.8$  Hz, 1H), 2.91 (d,  $J = 11.0$  Hz, 1H), 2.83 (dd,  $J = 18.1, 6.7$  Hz, 1H), 2.73 (dd,  $J = 18.1, 7.9$  Hz, 1H), 2.73 – 2.68 (m, 1H), 2.50 – 2.43 (m, 1H), 2.26 (ddd,  $J = 11.1, 7.9, 7.9$  Hz, 1H), 2.26 – 2.21 (m, 1H), 2.10 (d,  $J = 11.2$  Hz, 1H), 2.02 – 1.96 (m, 2H), 1.80 – 1.69 (m, 2H), 1.26 (s, 3H), 1.24 (s, 3H), 1.02 (s, 3H), 0.89 (s, 3H);  $^{13}\text{C}$  NMR (125 MHz,  $\text{CD}_2\text{Cl}_2$ )  $\delta$  206.0, 199.0, 192.8, 102.9, 96.7, 68.2, 50.3, 44.7, 43.9, 40.3, 40.0, 39.0, 38.0, 37.4, 30.6, 26.9, 25.8, 24.7, 23.7, 18.0; IR (thin film,  $\text{cm}^{-1}$ ) 3061, 2926, 2349, 1724, 1598, 1548, 1484, 1379; HRMS (ESI) calcd. for  $[\text{C}_{20}\text{H}_{27}\text{O}_5]^-$  (M -  $\text{H}_2\text{O}$  - H) $^-$  :  $m/z$  347.1864, found 347.1863.

## X-Ray crystallographic Analysis of 2

A colorless needle 0.060 x 0.030 x 0.020 mm in size was mounted on a Cryoloop with Paratone oil. Data were collected in a nitrogen gas stream at 100(2) K using phi and omega scans. Crystal-to-detector distance was 60 mm and exposure time was 10 seconds per frame using a scan width of 1.0°. Data collection was 100.0% complete to 67.000° in  $\theta$ . A total of 25275 reflections were collected covering the indices,  $-7 \leq h \leq 7$ ,  $-15 \leq k \leq 14$ ,  $-25 \leq l \leq 26$ . 3253 reflections were found to be symmetry independent, with an  $R_{\text{int}}$  of 0.0218. Indexing and unit cell refinement indicated a primitive, orthorhombic lattice. The space group was found to be P 21 21 21 (No. 19). The data were integrated using the Bruker SAINT software program and scaled using the SADABS software program. Solution by iterative methods (SHELXT) produced a complete heavy-atom phasing model consistent with the proposed structure. All non-hydrogen atoms were refined anisotropically by full-matrix least-squares (SHELXL-2013). All hydrogen atoms were placed using a riding model. Their positions were constrained relative to their parent atom using the appropriate HFIX command in SHELXL-2013. Absolute stereochemistry was unambiguously determined to be *R* at C3, C5, C9, C12 and C14, and *S* at C1 and C6, respectively.



Table 1. Crystal data and structure refinement for **2**.

|                                   |                                             |                       |
|-----------------------------------|---------------------------------------------|-----------------------|
| X-ray ID                          | maimone18                                   |                       |
| Sample/notebook ID                | XH_NP_1                                     |                       |
| Empirical formula                 | C20 H28 O5                                  |                       |
| Formula weight                    | 348.42                                      |                       |
| Temperature                       | 100(2) K                                    |                       |
| Wavelength                        | 1.54178 Å                                   |                       |
| Crystal system                    | Orthorhombic                                |                       |
| Space group                       | P 21 21 21                                  |                       |
| Unit cell dimensions              | a = 6.4066(3) Å                             | $\alpha = 90^\circ$ . |
|                                   | b = 12.6083(6) Å                            | $\beta = 90^\circ$ .  |
|                                   | c = 22.0227(11) Å                           | $\gamma = 90^\circ$ . |
| Volume                            | 1778.91(15) Å <sup>3</sup>                  |                       |
| Z                                 | 4                                           |                       |
| Density (calculated)              | 1.301 Mg/m <sup>3</sup>                     |                       |
| Absorption coefficient            | 0.750 mm <sup>-1</sup>                      |                       |
| F(000)                            | 752                                         |                       |
| Crystal size                      | 0.060 x 0.030 x 0.020 mm <sup>3</sup>       |                       |
| Crystal color/habit               | colorless needle                            |                       |
| Theta range for data collection   | 4.014 to 68.277°.                           |                       |
| Index ranges                      | -7 ≤ h ≤ 7, -15 ≤ k ≤ 14, -25 ≤ l ≤ 26      |                       |
| Reflections collected             | 25275                                       |                       |
| Independent reflections           | 3253 [R(int) = 0.0218]                      |                       |
| Completeness to theta = 67.000°   | 100.0 %                                     |                       |
| Absorption correction             | Semi-empirical from equivalents             |                       |
| Max. and min. transmission        | 0.929 and 0.863                             |                       |
| Refinement method                 | Full-matrix least-squares on F <sup>2</sup> |                       |
| Data / restraints / parameters    | 3253 / 0 / 231                              |                       |
| Goodness-of-fit on F <sup>2</sup> | 1.045                                       |                       |
| Final R indices [I > 2σ(I)]       | R1 = 0.0388, wR2 = 0.1028                   |                       |
| R indices (all data)              | R1 = 0.0392, wR2 = 0.1032                   |                       |
| Absolute structure parameter      | 0.04(4)                                     |                       |
| Extinction coefficient            | n/a                                         |                       |
| Largest diff. peak and hole       | 0.339 and -0.166 e.Å <sup>-3</sup>          |                       |

Table 2. Atomic coordinates ( $\times 10^4$ ) and equivalent isotropic displacement parameters ( $\text{\AA}^2 \times 10^3$ ) for maimone18.  $U(\text{eq})$  is defined as one third of the trace of the orthogonalized  $U^{ij}$  tensor.

|       | x       | y       | z        | $U(\text{eq})$ |
|-------|---------|---------|----------|----------------|
| C(1)  | 2027(4) | 4887(2) | 8864(1)  | 26(1)          |
| C(2)  | 1676(4) | 5217(2) | 8196(1)  | 30(1)          |
| C(3)  | 3043(4) | 4591(2) | 7749(1)  | 30(1)          |
| C(4)  | 2565(4) | 3383(2) | 7776(1)  | 29(1)          |
| C(5)  | 4012(4) | 3387(2) | 8359(1)  | 25(1)          |
| C(6)  | 2827(4) | 3725(2) | 8940(1)  | 23(1)          |
| C(7)  | 4297(4) | 3577(2) | 9489(1)  | 22(1)          |
| C(8)  | 6225(4) | 4249(2) | 9568(1)  | 23(1)          |
| C(9)  | 5575(4) | 5219(2) | 9943(1)  | 24(1)          |
| C(10) | 7098(4) | 6169(2) | 9846(1)  | 26(1)          |
| C(11) | 7592(4) | 6845(2) | 10402(1) | 31(1)          |
| C(12) | 6925(4) | 6320(2) | 10993(1) | 28(1)          |
| C(13) | 7424(4) | 5106(2) | 10979(1) | 24(1)          |
| C(14) | 5303(4) | 4997(2) | 10620(1) | 23(1)          |
| C(15) | 5149(4) | 4359(2) | 8069(1)  | 29(1)          |
| C(16) | 4584(4) | 6030(2) | 10942(1) | 27(1)          |
| C(17) | 3653(5) | 2749(2) | 7271(1)  | 37(1)          |
| C(18) | 273(4)  | 3052(2) | 7781(1)  | 32(1)          |
| C(19) | 9487(4) | 4749(2) | 10701(1) | 28(1)          |
| C(20) | 7215(4) | 4590(2) | 11606(1) | 29(1)          |
| O(1)  | 3504(3) | 5550(1) | 9755(1)  | 26(1)          |
| O(2)  | 3488(3) | 5666(1) | 9090(1)  | 27(1)          |
| O(3)  | 1088(3) | 3054(1) | 9027(1)  | 26(1)          |
| O(4)  | 3864(3) | 2904(1) | 9862(1)  | 26(1)          |
| O(5)  | 7832(3) | 6350(1) | 9352(1)  | 32(1)          |

Table 3. Bond lengths [Å] and angles [°] for maimone18.

|                |            |                 |          |
|----------------|------------|-----------------|----------|
| C(1)-O(2)      | 1.445(3)   | C(11)-H(11A)    | 0.9900   |
| C(1)-C(2)      | 1.546(3)   | C(11)-H(11B)    | 0.9900   |
| C(1)-C(6)      | 1.561(3)   | C(12)-C(16)     | 1.548(4) |
| C(1)-H(1)      | 1.0000     | C(12)-C(13)     | 1.563(3) |
| C(2)-C(3)      | 1.536(4)   | C(12)-H(12)     | 1.0000   |
| C(2)-H(2A)     | 0.9900     | C(13)-C(19)     | 1.524(3) |
| C(2)-H(2B)     | 0.9900     | C(13)-C(20)     | 1.532(4) |
| C(3)-C(15)     | 1.550(3)   | C(13)-C(14)     | 1.578(3) |
| C(3)-C(4)      | 1.556(4)   | C(14)-C(16)     | 1.553(3) |
| C(3)-H(3)      | 1.0000     | C(14)-H(14)     | 1.0000   |
| C(4)-C(18)     | 1.526(4)   | C(15)-H(15A)    | 0.9900   |
| C(4)-C(17)     | 1.537(4)   | C(15)-H(15B)    | 0.9900   |
| C(4)-C(5)      | 1.584(3)   | C(16)-H(16A)    | 0.9900   |
| C(5)-C(6)      | 1.547(3)   | C(16)-H(16B)    | 0.9900   |
| C(5)-C(15)     | 1.563(4)   | C(17)-H(17A)    | 0.9800   |
| C(5)-H(5)      | 1.0000     | C(17)-H(17B)    | 0.9800   |
| C(6)-O(3)      | 1.411(3)   | C(17)-H(17C)    | 0.9800   |
| C(6)-C(7)      | 1.544(3)   | C(18)-H(18A)    | 0.9800   |
| C(7)-O(4)      | 1.213(3)   | C(18)-H(18B)    | 0.9800   |
| C(7)-C(8)      | 1.508(3)   | C(18)-H(18C)    | 0.9800   |
| C(8)-C(9)      | 1.533(3)   | C(19)-H(19A)    | 0.9800   |
| C(8)-H(8A)     | 0.9900     | C(19)-H(19B)    | 0.9800   |
| C(8)-H(8B)     | 0.9900     | C(19)-H(19C)    | 0.9800   |
| C(9)-O(1)      | 1.451(3)   | C(20)-H(20A)    | 0.9800   |
| C(9)-C(14)     | 1.528(3)   | C(20)-H(20B)    | 0.9800   |
| C(9)-C(10)     | 1.560(3)   | C(20)-H(20C)    | 0.9800   |
| C(10)-O(5)     | 1.207(3)   | O(1)-O(2)       | 1.472(2) |
| C(10)-C(11)    | 1.526(3)   | O(3)-H(3A)      | 0.8400   |
| C(11)-C(12)    | 1.520(4)   |                 |          |
| O(2)-C(1)-C(2) | 103.82(19) | C(2)-C(1)-H(1)  | 108.7    |
| O(2)-C(1)-C(6) | 112.87(19) | C(6)-C(1)-H(1)  | 108.7    |
| C(2)-C(1)-C(6) | 113.7(2)   | C(3)-C(2)-C(1)  | 112.9(2) |
| O(2)-C(1)-H(1) | 108.7      | C(3)-C(2)-H(2A) | 109.0    |

|                  |            |                     |            |
|------------------|------------|---------------------|------------|
| C(1)-C(2)-H(2A)  | 109.0      | H(8A)-C(8)-H(8B)    | 108.6      |
| C(3)-C(2)-H(2B)  | 109.0      | O(1)-C(9)-C(14)     | 103.08(18) |
| C(1)-C(2)-H(2B)  | 109.0      | O(1)-C(9)-C(8)      | 109.0(2)   |
| H(2A)-C(2)-H(2B) | 107.8      | C(14)-C(9)-C(8)     | 114.3(2)   |
| C(2)-C(3)-C(15)  | 107.6(2)   | O(1)-C(9)-C(10)     | 108.17(18) |
| C(2)-C(3)-C(4)   | 111.5(2)   | C(14)-C(9)-C(10)    | 110.18(19) |
| C(15)-C(3)-C(4)  | 88.2(2)    | C(8)-C(9)-C(10)     | 111.7(2)   |
| C(2)-C(3)-H(3)   | 115.5      | O(5)-C(10)-C(11)    | 122.5(2)   |
| C(15)-C(3)-H(3)  | 115.5      | O(5)-C(10)-C(9)     | 120.8(2)   |
| C(4)-C(3)-H(3)   | 115.5      | C(11)-C(10)-C(9)    | 116.7(2)   |
| C(18)-C(4)-C(17) | 107.5(2)   | C(12)-C(11)-C(10)   | 112.7(2)   |
| C(18)-C(4)-C(3)  | 117.2(2)   | C(12)-C(11)-H(11A)  | 109.1      |
| C(17)-C(4)-C(3)  | 113.1(2)   | C(10)-C(11)-H(11A)  | 109.1      |
| C(18)-C(4)-C(5)  | 123.9(2)   | C(12)-C(11)-H(11B)  | 109.1      |
| C(17)-C(4)-C(5)  | 108.8(2)   | C(10)-C(11)-H(11B)  | 109.1      |
| C(3)-C(4)-C(5)   | 85.02(19)  | H(11A)-C(11)-H(11B) | 107.8      |
| C(6)-C(5)-C(15)  | 110.5(2)   | C(11)-C(12)-C(16)   | 108.3(2)   |
| C(6)-C(5)-C(4)   | 112.56(19) | C(11)-C(12)-C(13)   | 110.6(2)   |
| C(15)-C(5)-C(4)  | 86.76(18)  | C(16)-C(12)-C(13)   | 88.05(18)  |
| C(6)-C(5)-H(5)   | 114.6      | C(11)-C(12)-H(12)   | 115.5      |
| C(15)-C(5)-H(5)  | 114.6      | C(16)-C(12)-H(12)   | 115.5      |
| C(4)-C(5)-H(5)   | 114.6      | C(13)-C(12)-H(12)   | 115.5      |
| O(3)-C(6)-C(7)   | 107.65(18) | C(19)-C(13)-C(20)   | 108.1(2)   |
| O(3)-C(6)-C(5)   | 109.53(19) | C(19)-C(13)-C(12)   | 118.3(2)   |
| C(7)-C(6)-C(5)   | 108.33(18) | C(20)-C(13)-C(12)   | 112.4(2)   |
| O(3)-C(6)-C(1)   | 108.53(19) | C(19)-C(13)-C(14)   | 121.3(2)   |
| C(7)-C(6)-C(1)   | 113.40(19) | C(20)-C(13)-C(14)   | 109.8(2)   |
| C(5)-C(6)-C(1)   | 109.34(19) | C(12)-C(13)-C(14)   | 85.36(18)  |
| O(4)-C(7)-C(8)   | 120.2(2)   | C(9)-C(14)-C(16)    | 109.1(2)   |
| O(4)-C(7)-C(6)   | 118.3(2)   | C(9)-C(14)-C(13)    | 112.02(19) |
| C(8)-C(7)-C(6)   | 121.5(2)   | C(16)-C(14)-C(13)   | 87.34(18)  |
| C(7)-C(8)-C(9)   | 106.71(19) | C(9)-C(14)-H(14)    | 115.1      |
| C(7)-C(8)-H(8A)  | 110.4      | C(16)-C(14)-H(14)   | 115.1      |
| C(9)-C(8)-H(8A)  | 110.4      | C(13)-C(14)-H(14)   | 115.1      |
| C(7)-C(8)-H(8B)  | 110.4      | C(3)-C(15)-C(5)     | 85.91(19)  |
| C(9)-C(8)-H(8B)  | 110.4      | C(3)-C(15)-H(15A)   | 114.3      |

|                     |           |                     |            |
|---------------------|-----------|---------------------|------------|
| C(5)-C(15)-H(15A)   | 114.3     | C(4)-C(18)-H(18C)   | 109.5      |
| C(3)-C(15)-H(15B)   | 114.3     | H(18A)-C(18)-H(18C) | 109.5      |
| C(5)-C(15)-H(15B)   | 114.3     | H(18B)-C(18)-H(18C) | 109.5      |
| H(15A)-C(15)-H(15B) | 111.5     | C(13)-C(19)-H(19A)  | 109.5      |
| C(12)-C(16)-C(14)   | 86.74(18) | C(13)-C(19)-H(19B)  | 109.5      |
| C(12)-C(16)-H(16A)  | 114.2     | H(19A)-C(19)-H(19B) | 109.5      |
| C(14)-C(16)-H(16A)  | 114.2     | C(13)-C(19)-H(19C)  | 109.5      |
| C(12)-C(16)-H(16B)  | 114.2     | H(19A)-C(19)-H(19C) | 109.5      |
| C(14)-C(16)-H(16B)  | 114.2     | H(19B)-C(19)-H(19C) | 109.5      |
| H(16A)-C(16)-H(16B) | 111.4     | C(13)-C(20)-H(20A)  | 109.5      |
| C(4)-C(17)-H(17A)   | 109.5     | C(13)-C(20)-H(20B)  | 109.5      |
| C(4)-C(17)-H(17B)   | 109.5     | H(20A)-C(20)-H(20B) | 109.5      |
| H(17A)-C(17)-H(17B) | 109.5     | C(13)-C(20)-H(20C)  | 109.5      |
| C(4)-C(17)-H(17C)   | 109.5     | H(20A)-C(20)-H(20C) | 109.5      |
| H(17A)-C(17)-H(17C) | 109.5     | H(20B)-C(20)-H(20C) | 109.5      |
| H(17B)-C(17)-H(17C) | 109.5     | C(9)-O(1)-O(2)      | 108.54(16) |
| C(4)-C(18)-H(18A)   | 109.5     | C(1)-O(2)-O(1)      | 106.23(16) |
| C(4)-C(18)-H(18B)   | 109.5     | C(6)-O(3)-H(3A)     | 109.5      |
| H(18A)-C(18)-H(18B) | 109.5     |                     |            |

---

Symmetry transformations used to generate equivalent atoms:

Table 4. Anisotropic displacement parameters ( $\text{\AA}^2 \times 10^3$ ) for maimone18. The anisotropic displacement factor exponent takes the form:  $-2\pi^2 [h^2 a^{*2} U^{11} + \dots + 2 h k a^* b^* U^{12}]$

|       | U <sup>11</sup> | U <sup>22</sup> | U <sup>33</sup> | U <sup>23</sup> | U <sup>13</sup> | U <sup>12</sup> |
|-------|-----------------|-----------------|-----------------|-----------------|-----------------|-----------------|
| C(1)  | 21(1)           | 29(1)           | 28(1)           | 1(1)            | 0(1)            | 3(1)            |
| C(2)  | 28(1)           | 30(1)           | 31(1)           | 6(1)            | -3(1)           | 4(1)            |
| C(3)  | 27(1)           | 38(1)           | 23(1)           | 9(1)            | 0(1)            | 3(1)            |
| C(4)  | 28(1)           | 35(1)           | 23(1)           | 4(1)            | -2(1)           | 7(1)            |
| C(5)  | 22(1)           | 29(1)           | 24(1)           | 3(1)            | -1(1)           | 5(1)            |
| C(6)  | 21(1)           | 26(1)           | 23(1)           | 0(1)            | 1(1)            | 0(1)            |
| C(7)  | 23(1)           | 21(1)           | 22(1)           | -2(1)           | 3(1)            | 4(1)            |
| C(8)  | 23(1)           | 22(1)           | 25(1)           | 0(1)            | 0(1)            | 1(1)            |
| C(9)  | 22(1)           | 21(1)           | 28(1)           | 1(1)            | 1(1)            | -1(1)           |
| C(10) | 25(1)           | 20(1)           | 32(1)           | 2(1)            | -1(1)           | 1(1)            |
| C(11) | 34(1)           | 20(1)           | 38(1)           | -2(1)           | 0(1)            | -5(1)           |
| C(12) | 30(1)           | 22(1)           | 31(1)           | -5(1)           | 0(1)            | -2(1)           |
| C(13) | 23(1)           | 22(1)           | 27(1)           | -4(1)           | -1(1)           | -2(1)           |
| C(14) | 20(1)           | 21(1)           | 26(1)           | -2(1)           | 1(1)            | -1(1)           |
| C(15) | 24(1)           | 38(1)           | 26(1)           | 8(1)            | 3(1)            | 3(1)            |
| C(16) | 26(1)           | 25(1)           | 30(1)           | -5(1)           | 0(1)            | 1(1)            |
| C(17) | 41(2)           | 47(2)           | 23(1)           | 0(1)            | -2(1)           | 13(1)           |
| C(18) | 32(1)           | 37(1)           | 26(1)           | 2(1)            | -8(1)           | 3(1)            |
| C(19) | 22(1)           | 29(1)           | 33(1)           | -2(1)           | -2(1)           | -2(1)           |
| C(20) | 32(1)           | 28(1)           | 27(1)           | -2(1)           | -3(1)           | 0(1)            |
| O(1)  | 26(1)           | 25(1)           | 26(1)           | 0(1)            | -1(1)           | 3(1)            |
| O(2)  | 30(1)           | 23(1)           | 28(1)           | 4(1)            | -1(1)           | 1(1)            |
| O(3)  | 25(1)           | 29(1)           | 23(1)           | 2(1)            | 0(1)            | -4(1)           |
| O(4)  | 30(1)           | 22(1)           | 25(1)           | 2(1)            | -3(1)           | -2(1)           |
| O(5)  | 32(1)           | 27(1)           | 36(1)           | 4(1)            | 7(1)            | -3(1)           |

Table 5. Hydrogen coordinates ( $\times 10^4$ ) and isotropic displacement parameters ( $\text{\AA}^2 \times 10^{-3}$ ) for maimone18.

|        | x     | y    | z     | U(eq) |
|--------|-------|------|-------|-------|
| H(1)   | 681   | 4964 | 9090  | 31    |
| H(2A)  | 190   | 5107 | 8090  | 36    |
| H(2B)  | 1984  | 5983 | 8152  | 36    |
| H(3)   | 3153  | 4899 | 7331  | 35    |
| H(5)   | 4902  | 2740 | 8407  | 30    |
| H(8A)  | 6773  | 4473 | 9167  | 28    |
| H(8B)  | 7326  | 3844 | 9782  | 28    |
| H(11A) | 9112  | 6983 | 10416 | 37    |
| H(11B) | 6872  | 7537 | 10364 | 37    |
| H(12)  | 7340  | 6700 | 11372 | 33    |
| H(14)  | 4465  | 4351 | 10719 | 27    |
| H(15A) | 5585  | 4909 | 8364  | 35    |
| H(15B) | 6301  | 4170 | 7789  | 35    |
| H(16A) | 3764  | 6515 | 10681 | 33    |
| H(16B) | 3886  | 5912 | 11337 | 33    |
| H(17A) | 3557  | 1989 | 7362  | 55    |
| H(17B) | 5125  | 2958 | 7249  | 55    |
| H(17C) | 2973  | 2895 | 6882  | 55    |
| H(18A) | -373  | 3242 | 7393  | 48    |
| H(18B) | -453  | 3419 | 8112  | 48    |
| H(18C) | 173   | 2284 | 7843  | 48    |
| H(19A) | 10641 | 4970 | 10964 | 42    |
| H(19B) | 9653  | 5072 | 10299 | 42    |
| H(19C) | 9492  | 3975 | 10662 | 42    |
| H(20A) | 7168  | 3817 | 11560 | 43    |
| H(20B) | 5927  | 4836 | 11800 | 43    |
| H(20C) | 8416  | 4787 | 11857 | 43    |
| H(3A)  | 1066  | 2841 | 9388  | 39    |

### X-Ray crystallographic Analysis 3

A colorless plate 0.060 x 0.040 x 0.030 mm in size was mounted on a Cryoloop with Paratone oil. Data were collected in a nitrogen gas stream at 100(2) K using phi and omega scans. Crystal-to-detector distance was 60 mm and exposure time was 10 seconds per frame using a scan width of 1.0°. Data collection was 100.0% complete to 67.000° in  $\theta$ . A total of 27487 reflections were collected covering the indices,  $-7 \leq h \leq 7$ ,  $-16 \leq k \leq 16$ ,  $-24 \leq l \leq 24$ . 3318 reflections were found to be symmetry independent, with an  $R_{\text{int}}$  of 0.0290. Indexing and unit cell refinement indicated a primitive, orthorhombic lattice. The space group was found to be P 21 21 21 (No. 19). The data were integrated using the Bruker SAINT software program and scaled using the SADABS software program. Solution by iterative methods (SHELXT) produced a complete heavy-atom phasing model consistent with the proposed structure. All non-hydrogen atoms were refined anisotropically by full-matrix least-squares (SHELXL-2013). All hydrogen atoms were placed using a riding model. Their positions were constrained relative to their parent atom using the appropriate HFIX command in SHELXL-2013. Absolute stereochemistry was unambiguously determined to be *R* at C3, C5, C6, C12, and C14, respectively.



Table 1. Crystal data and structure refinement for **3**.

|                                   |                                             |                       |
|-----------------------------------|---------------------------------------------|-----------------------|
| X-ray ID                          | maimone15                                   |                       |
| Sample/notebook ID                | XH_54_SPS                                   |                       |
| Empirical formula                 | C20 H28 O6                                  |                       |
| Formula weight                    | 364.42                                      |                       |
| Temperature                       | 100(2) K                                    |                       |
| Wavelength                        | 1.54178 Å                                   |                       |
| Crystal system                    | Orthorhombic                                |                       |
| Space group                       | P 21 21 21                                  |                       |
| Unit cell dimensions              | a = 6.4231(5) Å                             | $\alpha = 90^\circ$ . |
|                                   | b = 13.8311(9) Å                            | $\beta = 90^\circ$ .  |
|                                   | c = 20.3077(14) Å                           | $\gamma = 90^\circ$ . |
| Volume                            | 1804.1(2) Å <sup>3</sup>                    |                       |
| Z                                 | 4                                           |                       |
| Density (calculated)              | 1.342 Mg/m <sup>3</sup>                     |                       |
| Absorption coefficient            | 0.807 mm <sup>-1</sup>                      |                       |
| F(000)                            | 784                                         |                       |
| Crystal size                      | 0.060 x 0.040 x 0.030 mm <sup>3</sup>       |                       |
| Crystal color/habit               | colorless plate                             |                       |
| Theta range for data collection   | 3.867 to 68.463°.                           |                       |
| Index ranges                      | -7 ≤ h ≤ 7, -16 ≤ k ≤ 16, -24 ≤ l ≤ 24      |                       |
| Reflections collected             | 27487                                       |                       |
| Independent reflections           | 3318 [R(int) = 0.0290]                      |                       |
| Completeness to theta = 67.000°   | 100.0 %                                     |                       |
| Absorption correction             | Semi-empirical from equivalents             |                       |
| Max. and min. transmission        | 0.929 and 0.846                             |                       |
| Refinement method                 | Full-matrix least-squares on F <sup>2</sup> |                       |
| Data / restraints / parameters    | 3318 / 0 / 259                              |                       |
| Goodness-of-fit on F <sup>2</sup> | 1.104                                       |                       |
| Final R indices [I > 2σ(I)]       | R1 = 0.0714, wR2 = 0.1882                   |                       |
| R indices (all data)              | R1 = 0.0725, wR2 = 0.1901                   |                       |
| Absolute structure parameter      | 0.02(6)                                     |                       |
| Extinction coefficient            | n/a                                         |                       |
| Largest diff. peak and hole       | 0.518 and -0.243 e.Å <sup>-3</sup>          |                       |

Table 2. Atomic coordinates ( $\times 10^4$ ) and equivalent isotropic displacement parameters ( $\text{\AA}^2 \times 10^3$ ) for maimone15.  $U(\text{eq})$  is defined as one third of the trace of the orthogonalized  $U^{ij}$  tensor.

|       | x         | y        | z       | $U(\text{eq})$ |
|-------|-----------|----------|---------|----------------|
| C(1)  | -2499(9)  | 4845(3)  | 5749(2) | 57(1)          |
| C(2)  | -2206(8)  | 5938(4)  | 5761(3) | 62(2)          |
| C(3)  | -406(8)   | 6277(3)  | 5369(3) | 56(1)          |
| C(4)  | -519(8)   | 5921(3)  | 4647(2) | 46(1)          |
| C(5)  | 469(6)    | 4970(3)  | 4916(2) | 35(1)          |
| C(6)  | -1109(6)  | 4295(3)  | 5241(2) | 34(1)          |
| C(7)  | 60(6)     | 3430(3)  | 5561(2) | 31(1)          |
| C(8)  | -1241(7)  | 2695(3)  | 5937(2) | 37(1)          |
| C(9)  | -1707(7)  | 2966(3)  | 6657(2) | 34(1)          |
| C(10) | 276(7)    | 3022(3)  | 7096(2) | 40(1)          |
| C(11) | 75(8)     | 2582(4)  | 7791(2) | 54(1)          |
| C(12) | -1894(7)  | 2019(3)  | 7890(2) | 44(1)          |
| C(13) | -2384(7)  | 1372(3)  | 7277(2) | 43(1)          |
| C(14) | -3320(6)  | 2321(3)  | 6972(2) | 39(1)          |
| C(15) | 1445(8)   | 5580(3)  | 5481(2) | 46(1)          |
| C(16) | -3733(7)  | 2666(4)  | 7685(2) | 47(1)          |
| C(17) | 1038(10)  | 6436(4)  | 4195(3) | 67(2)          |
| C(18) | -2628(8)  | 5900(3)  | 4297(2) | 50(1)          |
| C(19) | -595(10)  | 840(4)   | 6950(3) | 62(1)          |
| C(20) | -4119(10) | 642(4)   | 7423(3) | 61(1)          |
| O(1)  | -2850(10) | 3884(5)  | 6697(3) | 38(2)          |
| O(2)  | -1556(7)  | 4647(3)  | 6426(2) | 35(1)          |
| O(1A) | -1930(30) | 4011(12) | 6621(8) | 47(4)          |
| O(2A) | -3725(13) | 4104(6)  | 6188(4) | 39(3)          |
| O(3)  | -2569(4)  | 3890(2)  | 4787(1) | 40(1)          |
| O(4)  | -1372(5)  | 3407(2)  | 4270(2) | 49(1)          |
| O(5)  | 1882(4)   | 3328(2)  | 5460(1) | 39(1)          |
| O(6)  | 1836(5)   | 3400(3)  | 6910(2) | 51(1)          |

Table 3. Bond lengths [Å] and angles [°] for maimone15.

|                |           |                 |           |
|----------------|-----------|-----------------|-----------|
| C(1)-C(2)      | 1.524(7)  | C(11)-H(11A)    | 0.9900    |
| C(1)-O(2)      | 1.526(6)  | C(11)-H(11B)    | 0.9900    |
| C(1)-C(6)      | 1.562(5)  | C(12)-C(16)     | 1.539(6)  |
| C(1)-O(2A)     | 1.570(10) | C(12)-C(13)     | 1.565(6)  |
| C(1)-H(1)      | 1.0000    | C(12)-H(12)     | 1.0000    |
| C(2)-C(3)      | 1.480(8)  | C(13)-C(19)     | 1.518(7)  |
| C(2)-H(2A)     | 0.9900    | C(13)-C(20)     | 1.533(6)  |
| C(2)-H(2B)     | 0.9900    | C(13)-C(14)     | 1.571(6)  |
| C(3)-C(15)     | 1.547(6)  | C(14)-C(16)     | 1.549(6)  |
| C(3)-C(4)      | 1.548(6)  | C(14)-H(14)     | 1.0000    |
| C(3)-H(3)      | 1.0000    | C(15)-H(15A)    | 0.9900    |
| C(4)-C(18)     | 1.531(6)  | C(15)-H(15B)    | 0.9900    |
| C(4)-C(17)     | 1.532(8)  | C(16)-H(16A)    | 0.9900    |
| C(4)-C(5)      | 1.558(5)  | C(16)-H(16B)    | 0.9900    |
| C(5)-C(6)      | 1.528(6)  | C(17)-H(17A)    | 0.9800    |
| C(5)-C(15)     | 1.556(5)  | C(17)-H(17B)    | 0.9800    |
| C(5)-H(5)      | 1.0000    | C(17)-H(17C)    | 0.9800    |
| C(6)-O(3)      | 1.429(5)  | C(18)-H(18A)    | 0.9800    |
| C(6)-C(7)      | 1.556(5)  | C(18)-H(18B)    | 0.9800    |
| C(7)-O(5)      | 1.196(5)  | C(18)-H(18C)    | 0.9800    |
| C(7)-C(8)      | 1.521(5)  | C(19)-H(19A)    | 0.9800    |
| C(8)-C(9)      | 1.539(5)  | C(19)-H(19B)    | 0.9800    |
| C(8)-H(8A)     | 0.9900    | C(19)-H(19C)    | 0.9800    |
| C(8)-H(8B)     | 0.9900    | C(20)-H(20A)    | 0.9800    |
| C(9)-O(1A)     | 1.455(17) | C(20)-H(20B)    | 0.9800    |
| C(9)-O(1)      | 1.469(8)  | C(20)-H(20C)    | 0.9800    |
| C(9)-C(14)     | 1.510(6)  | O(1)-O(2)       | 1.452(7)  |
| C(9)-C(10)     | 1.557(6)  | O(1A)-O(2A)     | 1.454(18) |
| C(10)-O(6)     | 1.192(5)  | O(3)-O(4)       | 1.463(4)  |
| C(10)-C(11)    | 1.542(6)  | O(4)-H(4)       | 0.8400    |
| C(11)-C(12)    | 1.499(7)  |                 |           |
| C(2)-C(1)-O(2) | 96.6(4)   | O(2)-C(1)-C(6)  | 106.3(4)  |
| C(2)-C(1)-C(6) | 115.0(4)  | C(2)-C(1)-O(2A) | 134.5(5)  |

|                  |          |                     |          |
|------------------|----------|---------------------|----------|
| C(6)-C(1)-O(2A)  | 110.1(4) | C(8)-C(7)-C(6)      | 117.3(3) |
| C(2)-C(1)-H(1)   | 112.6    | C(7)-C(8)-C(9)      | 114.9(3) |
| O(2)-C(1)-H(1)   | 112.6    | C(7)-C(8)-H(8A)     | 108.5    |
| C(6)-C(1)-H(1)   | 112.6    | C(9)-C(8)-H(8A)     | 108.5    |
| C(3)-C(2)-C(1)   | 113.7(4) | C(7)-C(8)-H(8B)     | 108.5    |
| C(3)-C(2)-H(2A)  | 108.8    | C(9)-C(8)-H(8B)     | 108.5    |
| C(1)-C(2)-H(2A)  | 108.8    | H(8A)-C(8)-H(8B)    | 107.5    |
| C(3)-C(2)-H(2B)  | 108.8    | O(1A)-C(9)-C(14)    | 122.6(7) |
| C(1)-C(2)-H(2B)  | 108.8    | O(1)-C(9)-C(14)     | 98.3(4)  |
| H(2A)-C(2)-H(2B) | 107.7    | O(1A)-C(9)-C(8)     | 102.4(7) |
| C(2)-C(3)-C(15)  | 108.9(4) | O(1)-C(9)-C(8)      | 111.1(4) |
| C(2)-C(3)-C(4)   | 111.8(4) | C(14)-C(9)-C(8)     | 113.1(3) |
| C(15)-C(3)-C(4)  | 88.7(3)  | O(1A)-C(9)-C(10)    | 93.5(7)  |
| C(2)-C(3)-H(3)   | 114.9    | O(1)-C(9)-C(10)     | 109.5(4) |
| C(15)-C(3)-H(3)  | 114.9    | C(14)-C(9)-C(10)    | 110.4(3) |
| C(4)-C(3)-H(3)   | 114.9    | C(8)-C(9)-C(10)     | 113.4(3) |
| C(18)-C(4)-C(17) | 107.9(4) | O(6)-C(10)-C(11)    | 122.2(4) |
| C(18)-C(4)-C(3)  | 119.2(4) | O(6)-C(10)-C(9)     | 121.9(4) |
| C(17)-C(4)-C(3)  | 112.8(4) | C(11)-C(10)-C(9)    | 115.9(4) |
| C(18)-C(4)-C(5)  | 120.4(3) | C(12)-C(11)-C(10)   | 113.5(4) |
| C(17)-C(4)-C(5)  | 109.6(4) | C(12)-C(11)-H(11A)  | 108.9    |
| C(3)-C(4)-C(5)   | 85.3(3)  | C(10)-C(11)-H(11A)  | 108.9    |
| C(6)-C(5)-C(15)  | 106.3(3) | C(12)-C(11)-H(11B)  | 108.9    |
| C(6)-C(5)-C(4)   | 113.4(3) | C(10)-C(11)-H(11B)  | 108.9    |
| C(15)-C(5)-C(4)  | 88.0(3)  | H(11A)-C(11)-H(11B) | 107.7    |
| C(6)-C(5)-H(5)   | 115.3    | C(11)-C(12)-C(16)   | 108.0(4) |
| C(15)-C(5)-H(5)  | 115.3    | C(11)-C(12)-C(13)   | 111.1(4) |
| C(4)-C(5)-H(5)   | 115.3    | C(16)-C(12)-C(13)   | 87.9(3)  |
| O(3)-C(6)-C(5)   | 113.3(3) | C(11)-C(12)-H(12)   | 115.5    |
| O(3)-C(6)-C(7)   | 106.6(3) | C(16)-C(12)-H(12)   | 115.5    |
| C(5)-C(6)-C(7)   | 109.3(3) | C(13)-C(12)-H(12)   | 115.5    |
| O(3)-C(6)-C(1)   | 104.0(4) | C(19)-C(13)-C(20)   | 108.4(4) |
| C(5)-C(6)-C(1)   | 111.5(3) | C(19)-C(13)-C(12)   | 118.3(4) |
| C(7)-C(6)-C(1)   | 111.9(3) | C(20)-C(13)-C(12)   | 111.7(4) |
| O(5)-C(7)-C(8)   | 123.0(3) | C(19)-C(13)-C(14)   | 121.4(3) |
| O(5)-C(7)-C(6)   | 119.5(3) | C(20)-C(13)-C(14)   | 110.4(4) |

|                     |          |                     |           |
|---------------------|----------|---------------------|-----------|
| C(12)-C(13)-C(14)   | 85.0(3)  | C(4)-C(18)-H(18B)   | 109.5     |
| C(9)-C(14)-C(16)    | 109.4(4) | H(18A)-C(18)-H(18B) | 109.5     |
| C(9)-C(14)-C(13)    | 113.5(3) | C(4)-C(18)-H(18C)   | 109.5     |
| C(16)-C(14)-C(13)   | 87.3(3)  | H(18A)-C(18)-H(18C) | 109.5     |
| C(9)-C(14)-H(14)    | 114.6    | H(18B)-C(18)-H(18C) | 109.5     |
| C(16)-C(14)-H(14)   | 114.6    | C(13)-C(19)-H(19A)  | 109.5     |
| C(13)-C(14)-H(14)   | 114.6    | C(13)-C(19)-H(19B)  | 109.5     |
| C(3)-C(15)-C(5)     | 85.4(3)  | H(19A)-C(19)-H(19B) | 109.5     |
| C(3)-C(15)-H(15A)   | 114.4    | C(13)-C(19)-H(19C)  | 109.5     |
| C(5)-C(15)-H(15A)   | 114.4    | H(19A)-C(19)-H(19C) | 109.5     |
| C(3)-C(15)-H(15B)   | 114.4    | H(19B)-C(19)-H(19C) | 109.5     |
| C(5)-C(15)-H(15B)   | 114.4    | C(13)-C(20)-H(20A)  | 109.5     |
| H(15A)-C(15)-H(15B) | 111.5    | C(13)-C(20)-H(20B)  | 109.5     |
| C(12)-C(16)-C(14)   | 86.7(3)  | H(20A)-C(20)-H(20B) | 109.5     |
| C(12)-C(16)-H(16A)  | 114.2    | C(13)-C(20)-H(20C)  | 109.5     |
| C(14)-C(16)-H(16A)  | 114.2    | H(20A)-C(20)-H(20C) | 109.5     |
| C(12)-C(16)-H(16B)  | 114.2    | H(20B)-C(20)-H(20C) | 109.5     |
| C(14)-C(16)-H(16B)  | 114.2    | O(2)-O(1)-C(9)      | 108.8(5)  |
| H(16A)-C(16)-H(16B) | 111.4    | O(1)-O(2)-C(1)      | 104.1(4)  |
| C(4)-C(17)-H(17A)   | 109.5    | C(9)-O(1A)-O(2A)    | 101.3(10) |
| C(4)-C(17)-H(17B)   | 109.5    | O(1A)-O(2A)-C(1)    | 90.3(8)   |
| H(17A)-C(17)-H(17B) | 109.5    | C(6)-O(3)-O(4)      | 107.3(3)  |
| C(4)-C(17)-H(17C)   | 109.5    | O(3)-O(4)-H(4)      | 109.5     |
| H(17A)-C(17)-H(17C) | 109.5    |                     |           |
| H(17B)-C(17)-H(17C) | 109.5    |                     |           |
| C(4)-C(18)-H(18A)   | 109.5    |                     |           |

---

Symmetry transformations used to generate equivalent atoms:

Table 4. Anisotropic displacement parameters ( $\text{\AA}^2 \times 10^3$ ) for maimone15. The anisotropic displacement factor exponent takes the form:  $-2\pi^2 [ h^2 a^{*2} U^{11} + \dots + 2 h k a^* b^* U^{12} ]$

|       | U <sup>11</sup> | U <sup>22</sup> | U <sup>33</sup> | U <sup>23</sup> | U <sup>13</sup> | U <sup>12</sup> |
|-------|-----------------|-----------------|-----------------|-----------------|-----------------|-----------------|
| C(1)  | 77(3)           | 45(2)           | 49(2)           | 12(2)           | 21(2)           | 32(2)           |
| C(2)  | 61(3)           | 59(3)           | 66(3)           | -37(2)          | -27(2)          | 30(2)           |
| C(3)  | 64(3)           | 32(2)           | 72(3)           | -19(2)          | -33(3)          | 13(2)           |
| C(4)  | 59(3)           | 25(2)           | 54(2)           | 2(2)            | -22(2)          | -4(2)           |
| C(5)  | 44(2)           | 26(2)           | 35(2)           | -2(1)           | -6(2)           | 0(2)            |
| C(6)  | 41(2)           | 30(2)           | 32(2)           | 0(1)            | 2(2)            | 4(2)            |
| C(7)  | 36(2)           | 28(2)           | 30(2)           | -5(1)           | 1(1)            | 5(1)            |
| C(8)  | 45(2)           | 32(2)           | 33(2)           | -2(1)           | 2(2)            | 0(2)            |
| C(9)  | 42(2)           | 29(2)           | 31(2)           | -1(1)           | -2(2)           | 6(2)            |
| C(10) | 44(2)           | 38(2)           | 39(2)           | 0(2)            | -4(2)           | -1(2)           |
| C(11) | 51(3)           | 73(3)           | 40(2)           | 11(2)           | -12(2)          | -8(2)           |
| C(12) | 47(2)           | 54(2)           | 32(2)           | 10(2)           | 1(2)            | 6(2)            |
| C(13) | 49(2)           | 41(2)           | 40(2)           | 5(2)            | 7(2)            | -1(2)           |
| C(14) | 35(2)           | 50(2)           | 33(2)           | -3(2)           | 0(2)            | 5(2)            |
| C(15) | 56(3)           | 35(2)           | 47(2)           | -10(2)          | -21(2)          | 8(2)            |
| C(16) | 50(2)           | 56(2)           | 34(2)           | -2(2)           | 4(2)            | 8(2)            |
| C(17) | 77(4)           | 40(2)           | 84(4)           | 26(2)           | -32(3)          | -21(2)          |
| C(18) | 60(3)           | 38(2)           | 53(2)           | 6(2)            | -25(2)          | -1(2)           |
| C(19) | 83(4)           | 40(2)           | 63(3)           | 16(2)           | 24(3)           | 20(2)           |
| C(20) | 74(3)           | 59(3)           | 51(3)           | 3(2)            | 10(2)           | -22(3)          |
| O(1)  | 51(4)           | 30(3)           | 33(2)           | 3(2)            | 3(3)            | 11(3)           |
| O(2)  | 41(2)           | 31(3)           | 33(2)           | -4(2)           | -6(2)           | -1(2)           |
| O(1A) | 65(10)          | 37(7)           | 38(6)           | -5(5)           | -8(7)           | 1(8)            |
| O(2A) | 35(5)           | 39(5)           | 42(5)           | -6(4)           | 0(4)            | 2(3)            |
| O(3)  | 37(1)           | 42(1)           | 41(1)           | 7(1)            | -1(1)           | -4(1)           |
| O(4)  | 58(2)           | 50(2)           | 38(1)           | -6(1)           | 8(1)            | -22(1)          |
| O(5)  | 40(2)           | 36(1)           | 41(1)           | 3(1)            | 7(1)            | 9(1)            |
| O(6)  | 45(2)           | 59(2)           | 48(2)           | 10(1)           | -3(1)           | -9(2)           |

Table 5. Hydrogen coordinates ( $\times 10^4$ ) and isotropic displacement parameters ( $\text{\AA}^2 \times 10^{-3}$ ) for maimone15.

|        | x     | y    | z    | U(eq) |
|--------|-------|------|------|-------|
| H(1)   | -3997 | 4652 | 5722 | 69    |
| H(2A)  | -3486 | 6248 | 5590 | 74    |
| H(2B)  | -2022 | 6149 | 6223 | 74    |
| H(3)   | -65   | 6978 | 5422 | 67    |
| H(5)   | 1489  | 4649 | 4615 | 42    |
| H(8A)  | -503  | 2067 | 5931 | 44    |
| H(8B)  | -2579 | 2607 | 5702 | 44    |
| H(11A) | 1279  | 2151 | 7871 | 65    |
| H(11B) | 133   | 3110 | 8120 | 65    |
| H(12)  | -2037 | 1694 | 8328 | 53    |
| H(14)  | -4604 | 2220 | 6702 | 47    |
| H(15A) | 1447  | 5257 | 5916 | 55    |
| H(15B) | 2825  | 5860 | 5376 | 55    |
| H(16A) | -3494 | 3366 | 7756 | 56    |
| H(16B) | -5093 | 2460 | 7867 | 56    |
| H(17A) | 1154  | 6082 | 3779 | 100   |
| H(17B) | 2403  | 6461 | 4410 | 100   |
| H(17C) | 552   | 7095 | 4108 | 100   |
| H(18A) | -3057 | 6561 | 4190 | 76    |
| H(18B) | -3669 | 5602 | 4585 | 76    |
| H(18C) | -2510 | 5522 | 3890 | 76    |
| H(19A) | -128  | 311  | 7235 | 93    |
| H(19B) | 561   | 1290 | 6875 | 93    |
| H(19C) | -1061 | 576  | 6527 | 93    |
| H(20A) | -4630 | 367  | 7009 | 92    |
| H(20B) | -5265 | 968  | 7651 | 92    |
| H(20C) | -3572 | 123  | 7703 | 92    |
| H(4)   | -1538 | 2806 | 4299 | 73    |

### X-Ray crystallographic Analysis 11

A colorless block 0.040 x 0.030 x 0.030 mm in size was mounted on a Cryoloop with Paratone oil. Data were collected in a nitrogen gas stream at 100(2) K using phi and omega scans. Crystal-to-detector distance was 60 mm and exposure time was 10 seconds per frame using a scan width of 1.0°. Data collection was 98.4% complete to 67.000° in  $\theta$ . A total of 47377 reflections were collected covering the indices,  $-8 \leq h \leq 7$ ,  $-11 \leq k \leq 11$ ,  $-64 \leq l \leq 65$ . 6367 reflections were found to be symmetry independent, with an  $R_{\text{int}}$  of 0.0490. Indexing and unit cell refinement indicated a primitive, orthorhombic lattice. The space group was found to be P 21 21 21 (No. 19). The data were integrated using the Bruker SAINT software program and scaled using the SADABS software program. Solution by iterative methods (SHELXT) produced a complete heavy-atom phasing model consistent with the proposed structure. All non-hydrogen atoms were refined anisotropically by full-matrix least-squares (SHELXL-2013). All hydrogen atoms were placed using a riding model. Their positions were constrained relative to their parent atom using the appropriate HFIX command in SHELXL-2013. Absolute stereochemistry was unambiguously determined to be *R* at C2, C4, C13, C15, C22, C24, C33, and C35, and *S* at C1, C6, C21, and C26, respectively.



Table 1. Crystal data and structure refinement for **11**.

|                                   |                                                |          |
|-----------------------------------|------------------------------------------------|----------|
| X-ray ID                          | maimone23                                      |          |
| Sample/notebook ID                | XH-194-2                                       |          |
| Empirical formula                 | C <sub>20</sub> H <sub>28</sub> O <sub>5</sub> |          |
| Formula weight                    | 348.42                                         |          |
| Temperature                       | 100(2) K                                       |          |
| Wavelength                        | 1.54178 Å                                      |          |
| Crystal system                    | Orthorhombic                                   |          |
| Space group                       | P 21 21 21                                     |          |
| Unit cell dimensions              | a = 6.7606(4) Å                                | α = 90°. |
|                                   | b = 10.0156(5) Å                               | β = 90°. |
|                                   | c = 54.297(3) Å                                | γ = 90°. |
| Volume                            | 3676.5(3) Å <sup>3</sup>                       |          |
| Z                                 | 8                                              |          |
| Density (calculated)              | 1.259 Mg/m <sup>3</sup>                        |          |
| Absorption coefficient            | 0.726 mm <sup>-1</sup>                         |          |
| F(000)                            | 1504                                           |          |
| Crystal size                      | 0.040 x 0.030 x 0.030 mm <sup>3</sup>          |          |
| Crystal color/habit               | colorless block                                |          |
| Theta range for data collection   | 3.256 to 68.283°.                              |          |
| Index ranges                      | -8 ≤ h ≤ 7, -11 ≤ k ≤ 11, -64 ≤ l ≤ 65         |          |
| Reflections collected             | 47377                                          |          |
| Independent reflections           | 6367 [R(int) = 0.0490]                         |          |
| Completeness to theta = 67.000°   | 98.4 %                                         |          |
| Absorption correction             | Semi-empirical from equivalents                |          |
| Max. and min. transmission        | 0.929 and 0.774                                |          |
| Refinement method                 | Full-matrix least-squares on F <sup>2</sup>    |          |
| Data / restraints / parameters    | 6367 / 0 / 463                                 |          |
| Goodness-of-fit on F <sup>2</sup> | 1.179                                          |          |
| Final R indices [I > 2σ(I)]       | R1 = 0.0571, wR2 = 0.1278                      |          |
| R indices (all data)              | R1 = 0.0576, wR2 = 0.1281                      |          |
| Absolute structure parameter      | 0.05(7)                                        |          |
| Extinction coefficient            | n/a                                            |          |
| Largest diff. peak and hole       | 0.336 and -0.186 e.Å <sup>-3</sup>             |          |

Table 2. Atomic coordinates ( $\times 10^4$ ) and equivalent isotropic displacement parameters ( $\text{\AA}^2 \times 10^3$ ) for maimone23.  $U(\text{eq})$  is defined as one third of the trace of the orthogonalized  $U^{ij}$  tensor.

|       | x        | y        | z       | $U(\text{eq})$ |
|-------|----------|----------|---------|----------------|
| C(1)  | -2499(7) | 14339(4) | 3104(1) | 31(1)          |
| C(2)  | -1623(6) | 13796(5) | 2866(1) | 33(1)          |
| C(3)  | -2844(7) | 14162(5) | 2632(1) | 35(1)          |
| C(4)  | -1721(7) | 15527(5) | 2646(1) | 40(1)          |
| C(5)  | -2622(8) | 16477(5) | 2831(1) | 44(1)          |
| C(6)  | -3159(7) | 15834(4) | 3080(1) | 37(1)          |
| C(7)  | -8(7)    | 14780(5) | 2777(1) | 44(1)          |
| C(8)  | -2197(8) | 13311(5) | 2414(1) | 46(1)          |
| C(9)  | -5072(7) | 14182(5) | 2639(1) | 42(1)          |
| C(10) | -1076(7) | 14051(4) | 3318(1) | 31(1)          |
| C(11) | -2065(7) | 13108(4) | 3473(1) | 34(1)          |
| C(12) | -3866(7) | 12886(4) | 3376(1) | 31(1)          |
| C(13) | -5513(7) | 12024(4) | 3461(1) | 33(1)          |
| C(14) | -5177(8) | 11053(4) | 3676(1) | 39(1)          |
| C(15) | -6559(7) | 10058(4) | 3545(1) | 34(1)          |
| C(16) | -6163(7) | 10799(4) | 3298(1) | 32(1)          |
| C(17) | -4450(7) | 10218(4) | 3151(1) | 35(1)          |
| C(18) | -7946(7) | 11050(5) | 3133(1) | 39(1)          |
| C(19) | -6089(7) | 8587(4)  | 3577(1) | 39(1)          |
| C(20) | -7514(8) | 7655(4)  | 3454(1) | 40(1)          |
| C(21) | 355(6)   | 9649(4)  | 4413(1) | 27(1)          |
| C(22) | -1212(7) | 10176(4) | 4589(1) | 32(1)          |
| C(23) | -713(7)  | 9868(4)  | 4865(1) | 31(1)          |
| C(24) | 658(8)   | 11111(4) | 4850(1) | 39(1)          |
| C(25) | 2634(7)  | 10796(5) | 4737(1) | 39(1)          |
| C(26) | 2523(7)  | 9903(4)  | 4506(1) | 35(1)          |
| C(27) | -695(7)  | 11655(4) | 4644(1) | 36(1)          |
| C(28) | -2483(8) | 10115(4) | 5032(1) | 41(1)          |
| C(29) | 144(7)   | 8511(4)  | 4935(1) | 34(1)          |
| C(30) | -50(7)   | 10109(4) | 4149(1) | 32(1)          |
| C(31) | -592(7)  | 8945(4)  | 4013(1) | 33(1)          |

|       |          |          |         |       |
|-------|----------|----------|---------|-------|
| C(32) | -473(6)  | 7888(4)  | 4167(1) | 29(1) |
| C(33) | -922(7)  | 6460(4)  | 4130(1) | 29(1) |
| C(34) | -1877(7) | 5978(4)  | 3889(1) | 37(1) |
| C(35) | -3147(7) | 5009(4)  | 4041(1) | 31(1) |
| C(36) | -2733(6) | 5861(4)  | 4276(1) | 27(1) |
| C(37) | -2159(7) | 5090(4)  | 4507(1) | 36(1) |
| C(38) | -4311(6) | 6885(4)  | 4331(1) | 28(1) |
| C(39) | -5238(7) | 4790(4)  | 3954(1) | 35(1) |
| C(40) | -6387(7) | 3726(4)  | 4088(1) | 33(1) |
| O(1)  | -2556(6) | 16622(3) | 3282(1) | 46(1) |
| O(2)  | -4233(4) | 13555(3) | 3167(1) | 32(1) |
| O(3)  | 594(5)   | 14519(3) | 3338(1) | 38(1) |
| O(4)  | -8881(7) | 7954(4)  | 3332(1) | 82(2) |
| O(5)  | -7096(6) | 6400(3)  | 3505(1) | 61(1) |
| O(6)  | 3798(5)  | 10311(3) | 4317(1) | 41(1) |
| O(7)  | 89(4)    | 8195(2)  | 4397(1) | 28(1) |
| O(8)  | 0(5)     | 11274(3) | 4076(1) | 40(1) |
| O(9)  | -5782(5) | 3105(3)  | 4261(1) | 48(1) |
| O(10) | -8156(5) | 3535(3)  | 3987(1) | 44(1) |

---

Table 3. Bond lengths [Å] and angles [°] for maimone23.

|             |          |              |          |
|-------------|----------|--------------|----------|
| C(1)-O(2)   | 1.451(5) | C(13)-H(13)  | 1.0000   |
| C(1)-C(2)   | 1.523(6) | C(14)-C(15)  | 1.541(6) |
| C(1)-C(10)  | 1.533(6) | C(14)-H(14A) | 0.9900   |
| C(1)-C(6)   | 1.568(6) | C(14)-H(14B) | 0.9900   |
| C(2)-C(7)   | 1.550(7) | C(15)-C(19)  | 1.517(6) |
| C(2)-C(3)   | 1.559(6) | C(15)-C(16)  | 1.556(6) |
| C(2)-H(2)   | 1.0000   | C(15)-H(15)  | 1.0000   |
| C(3)-C(9)   | 1.507(7) | C(16)-C(18)  | 1.522(6) |
| C(3)-C(8)   | 1.523(6) | C(16)-C(17)  | 1.522(6) |
| C(3)-C(4)   | 1.565(7) | C(17)-H(17A) | 0.9800   |
| C(4)-C(5)   | 1.515(7) | C(17)-H(17B) | 0.9800   |
| C(4)-C(7)   | 1.551(7) | C(17)-H(17C) | 0.9800   |
| C(4)-H(4)   | 1.0000   | C(18)-H(18A) | 0.9800   |
| C(5)-C(6)   | 1.541(6) | C(18)-H(18B) | 0.9800   |
| C(5)-H(5A)  | 0.9900   | C(18)-H(18C) | 0.9800   |
| C(5)-H(5B)  | 0.9900   | C(19)-C(20)  | 1.498(7) |
| C(6)-O(1)   | 1.411(5) | C(19)-H(19A) | 0.9900   |
| C(6)-H(6)   | 1.0000   | C(19)-H(19B) | 0.9900   |
| C(7)-H(7A)  | 0.9900   | C(20)-O(4)   | 1.177(6) |
| C(7)-H(7B)  | 0.9900   | C(20)-O(5)   | 1.318(5) |
| C(8)-H(8A)  | 0.9800   | C(21)-O(7)   | 1.469(4) |
| C(8)-H(8B)  | 0.9800   | C(21)-C(22)  | 1.522(6) |
| C(8)-H(8C)  | 0.9800   | C(21)-C(30)  | 1.530(5) |
| C(9)-H(9A)  | 0.9800   | C(21)-C(26)  | 1.571(6) |
| C(9)-H(9B)  | 0.9800   | C(22)-C(27)  | 1.552(5) |
| C(9)-H(9C)  | 0.9800   | C(22)-C(23)  | 1.567(6) |
| C(10)-O(3)  | 1.228(5) | C(22)-H(22)  | 1.0000   |
| C(10)-C(11) | 1.430(6) | C(23)-C(28)  | 1.522(6) |
| C(11)-C(12) | 1.343(6) | C(23)-C(29)  | 1.526(6) |
| C(11)-H(11) | 0.9500   | C(23)-C(24)  | 1.555(6) |
| C(12)-O(2)  | 1.344(5) | C(24)-C(25)  | 1.503(7) |
| C(12)-C(13) | 1.482(6) | C(24)-C(27)  | 1.542(6) |
| C(13)-C(14) | 1.538(6) | C(24)-H(24)  | 1.0000   |
| C(13)-C(16) | 1.575(6) | C(25)-C(26)  | 1.544(6) |

|                 |          |                 |          |
|-----------------|----------|-----------------|----------|
| C(25)-H(25A)    | 0.9900   | C(34)-H(34A)    | 0.9900   |
| C(25)-H(25B)    | 0.9900   | C(34)-H(34B)    | 0.9900   |
| C(26)-O(6)      | 1.401(5) | C(35)-C(39)     | 1.508(6) |
| C(26)-H(26)     | 1.0000   | C(35)-C(36)     | 1.560(5) |
| C(27)-H(27A)    | 0.9900   | C(35)-H(35)     | 1.0000   |
| C(27)-H(27B)    | 0.9900   | C(36)-C(38)     | 1.509(6) |
| C(28)-H(28A)    | 0.9800   | C(36)-C(37)     | 1.522(5) |
| C(28)-H(28B)    | 0.9800   | C(37)-H(37A)    | 0.9800   |
| C(28)-H(28C)    | 0.9800   | C(37)-H(37B)    | 0.9800   |
| C(29)-H(29A)    | 0.9800   | C(37)-H(37C)    | 0.9800   |
| C(29)-H(29B)    | 0.9800   | C(38)-H(38A)    | 0.9800   |
| C(29)-H(29C)    | 0.9800   | C(38)-H(38B)    | 0.9800   |
| C(30)-O(8)      | 1.232(5) | C(38)-H(38C)    | 0.9800   |
| C(30)-C(31)     | 1.428(6) | C(39)-C(40)     | 1.505(6) |
| C(31)-C(32)     | 1.351(6) | C(39)-H(39A)    | 0.9900   |
| C(31)-H(31)     | 0.9500   | C(39)-H(39B)    | 0.9900   |
| C(32)-O(7)      | 1.341(5) | C(40)-O(9)      | 1.199(5) |
| C(32)-C(33)     | 1.476(5) | C(40)-O(10)     | 1.328(5) |
| C(33)-C(34)     | 1.536(6) | O(1)-H(1)       | 0.8400   |
| C(33)-C(36)     | 1.578(6) | O(5)-H(5)       | 0.8400   |
| C(33)-H(33)     | 1.0000   | O(6)-H(6A)      | 0.8400   |
| C(34)-C(35)     | 1.536(6) | O(10)-H(10)     | 0.8400   |
| O(2)-C(1)-C(2)  | 108.6(3) | C(9)-C(3)-C(2)  | 120.9(4) |
| O(2)-C(1)-C(10) | 103.2(3) | C(8)-C(3)-C(2)  | 110.5(4) |
| C(2)-C(1)-C(10) | 109.3(3) | C(9)-C(3)-C(4)  | 118.2(4) |
| O(2)-C(1)-C(6)  | 107.9(3) | C(8)-C(3)-C(4)  | 112.6(4) |
| C(2)-C(1)-C(6)  | 112.4(4) | C(2)-C(3)-C(4)  | 84.9(3)  |
| C(10)-C(1)-C(6) | 114.9(4) | C(5)-C(4)-C(7)  | 107.3(4) |
| C(1)-C(2)-C(7)  | 108.3(4) | C(5)-C(4)-C(3)  | 112.6(4) |
| C(1)-C(2)-C(3)  | 113.7(4) | C(7)-C(4)-C(3)  | 87.8(4)  |
| C(7)-C(2)-C(3)  | 88.1(3)  | C(5)-C(4)-H(4)  | 115.3    |
| C(1)-C(2)-H(2)  | 114.6    | C(7)-C(4)-H(4)  | 115.3    |
| C(7)-C(2)-H(2)  | 114.6    | C(3)-C(4)-H(4)  | 115.3    |
| C(3)-C(2)-H(2)  | 114.6    | C(4)-C(5)-C(6)  | 114.6(4) |
| C(9)-C(3)-C(8)  | 108.3(4) | C(4)-C(5)-H(5A) | 108.6    |

|                   |          |                     |          |
|-------------------|----------|---------------------|----------|
| C(6)-C(5)-H(5A)   | 108.6    | O(2)-C(12)-C(13)    | 114.5(4) |
| C(4)-C(5)-H(5B)   | 108.6    | C(12)-C(13)-C(14)   | 119.5(4) |
| C(6)-C(5)-H(5B)   | 108.6    | C(12)-C(13)-C(16)   | 119.4(3) |
| H(5A)-C(5)-H(5B)  | 107.6    | C(14)-C(13)-C(16)   | 88.6(3)  |
| O(1)-C(6)-C(5)    | 112.3(4) | C(12)-C(13)-H(13)   | 109.2    |
| O(1)-C(6)-C(1)    | 112.8(4) | C(14)-C(13)-H(13)   | 109.2    |
| C(5)-C(6)-C(1)    | 113.9(4) | C(16)-C(13)-H(13)   | 109.2    |
| O(1)-C(6)-H(6)    | 105.6    | C(13)-C(14)-C(15)   | 88.1(3)  |
| C(5)-C(6)-H(6)    | 105.6    | C(13)-C(14)-H(14A)  | 114.0    |
| C(1)-C(6)-H(6)    | 105.6    | C(15)-C(14)-H(14A)  | 114.0    |
| C(2)-C(7)-C(4)    | 85.7(3)  | C(13)-C(14)-H(14B)  | 114.0    |
| C(2)-C(7)-H(7A)   | 114.4    | C(15)-C(14)-H(14B)  | 114.0    |
| C(4)-C(7)-H(7A)   | 114.4    | H(14A)-C(14)-H(14B) | 111.2    |
| C(2)-C(7)-H(7B)   | 114.4    | C(19)-C(15)-C(14)   | 116.7(4) |
| C(4)-C(7)-H(7B)   | 114.4    | C(19)-C(15)-C(16)   | 121.6(4) |
| H(7A)-C(7)-H(7B)  | 111.5    | C(14)-C(15)-C(16)   | 89.2(3)  |
| C(3)-C(8)-H(8A)   | 109.5    | C(19)-C(15)-H(15)   | 109.2    |
| C(3)-C(8)-H(8B)   | 109.5    | C(14)-C(15)-H(15)   | 109.2    |
| H(8A)-C(8)-H(8B)  | 109.5    | C(16)-C(15)-H(15)   | 109.2    |
| C(3)-C(8)-H(8C)   | 109.5    | C(18)-C(16)-C(17)   | 111.0(3) |
| H(8A)-C(8)-H(8C)  | 109.5    | C(18)-C(16)-C(15)   | 116.7(4) |
| H(8B)-C(8)-H(8C)  | 109.5    | C(17)-C(16)-C(15)   | 113.6(4) |
| C(3)-C(9)-H(9A)   | 109.5    | C(18)-C(16)-C(13)   | 115.0(4) |
| C(3)-C(9)-H(9B)   | 109.5    | C(17)-C(16)-C(13)   | 112.3(4) |
| H(9A)-C(9)-H(9B)  | 109.5    | C(15)-C(16)-C(13)   | 86.3(3)  |
| C(3)-C(9)-H(9C)   | 109.5    | C(16)-C(17)-H(17A)  | 109.5    |
| H(9A)-C(9)-H(9C)  | 109.5    | C(16)-C(17)-H(17B)  | 109.5    |
| H(9B)-C(9)-H(9C)  | 109.5    | H(17A)-C(17)-H(17B) | 109.5    |
| O(3)-C(10)-C(11)  | 129.1(4) | C(16)-C(17)-H(17C)  | 109.5    |
| O(3)-C(10)-C(1)   | 124.8(4) | H(17A)-C(17)-H(17C) | 109.5    |
| C(11)-C(10)-C(1)  | 106.0(4) | H(17B)-C(17)-H(17C) | 109.5    |
| C(12)-C(11)-C(10) | 107.7(4) | C(16)-C(18)-H(18A)  | 109.5    |
| C(12)-C(11)-H(11) | 126.1    | C(16)-C(18)-H(18B)  | 109.5    |
| C(10)-C(11)-H(11) | 126.1    | H(18A)-C(18)-H(18B) | 109.5    |
| C(11)-C(12)-O(2)  | 114.5(4) | C(16)-C(18)-H(18C)  | 109.5    |
| C(11)-C(12)-C(13) | 131.1(4) | H(18A)-C(18)-H(18C) | 109.5    |

|                     |          |                     |          |
|---------------------|----------|---------------------|----------|
| H(18B)-C(18)-H(18C) | 109.5    | C(26)-C(25)-H(25A)  | 108.7    |
| C(20)-C(19)-C(15)   | 114.9(4) | C(24)-C(25)-H(25B)  | 108.7    |
| C(20)-C(19)-H(19A)  | 108.6    | C(26)-C(25)-H(25B)  | 108.7    |
| C(15)-C(19)-H(19A)  | 108.6    | H(25A)-C(25)-H(25B) | 107.6    |
| C(20)-C(19)-H(19B)  | 108.6    | O(6)-C(26)-C(25)    | 113.4(4) |
| C(15)-C(19)-H(19B)  | 108.6    | O(6)-C(26)-C(21)    | 112.8(3) |
| H(19A)-C(19)-H(19B) | 107.5    | C(25)-C(26)-C(21)   | 113.6(4) |
| O(4)-C(20)-O(5)     | 122.0(5) | O(6)-C(26)-H(26)    | 105.4    |
| O(4)-C(20)-C(19)    | 126.7(4) | C(25)-C(26)-H(26)   | 105.4    |
| O(5)-C(20)-C(19)    | 111.3(4) | C(21)-C(26)-H(26)   | 105.4    |
| O(7)-C(21)-C(22)    | 107.2(3) | C(24)-C(27)-C(22)   | 86.4(3)  |
| O(7)-C(21)-C(30)    | 102.7(3) | C(24)-C(27)-H(27A)  | 114.3    |
| C(22)-C(21)-C(30)   | 111.1(3) | C(22)-C(27)-H(27A)  | 114.3    |
| O(7)-C(21)-C(26)    | 107.1(3) | C(24)-C(27)-H(27B)  | 114.3    |
| C(22)-C(21)-C(26)   | 113.1(3) | C(22)-C(27)-H(27B)  | 114.3    |
| C(30)-C(21)-C(26)   | 114.7(3) | H(27A)-C(27)-H(27B) | 111.4    |
| C(21)-C(22)-C(27)   | 107.2(4) | C(23)-C(28)-H(28A)  | 109.5    |
| C(21)-C(22)-C(23)   | 112.5(3) | C(23)-C(28)-H(28B)  | 109.5    |
| C(27)-C(22)-C(23)   | 87.4(3)  | H(28A)-C(28)-H(28B) | 109.5    |
| C(21)-C(22)-H(22)   | 115.4    | C(23)-C(28)-H(28C)  | 109.5    |
| C(27)-C(22)-H(22)   | 115.4    | H(28A)-C(28)-H(28C) | 109.5    |
| C(23)-C(22)-H(22)   | 115.4    | H(28B)-C(28)-H(28C) | 109.5    |
| C(28)-C(23)-C(29)   | 107.1(3) | C(23)-C(29)-H(29A)  | 109.5    |
| C(28)-C(23)-C(24)   | 111.7(3) | C(23)-C(29)-H(29B)  | 109.5    |
| C(29)-C(23)-C(24)   | 120.0(4) | H(29A)-C(29)-H(29B) | 109.5    |
| C(28)-C(23)-C(22)   | 111.7(4) | C(23)-C(29)-H(29C)  | 109.5    |
| C(29)-C(23)-C(22)   | 119.7(3) | H(29A)-C(29)-H(29C) | 109.5    |
| C(24)-C(23)-C(22)   | 85.4(3)  | H(29B)-C(29)-H(29C) | 109.5    |
| C(25)-C(24)-C(27)   | 107.9(4) | O(8)-C(30)-C(31)    | 128.0(4) |
| C(25)-C(24)-C(23)   | 112.6(4) | O(8)-C(30)-C(21)    | 125.4(4) |
| C(27)-C(24)-C(23)   | 88.1(3)  | C(31)-C(30)-C(21)   | 106.6(3) |
| C(25)-C(24)-H(24)   | 115.1    | C(32)-C(31)-C(30)   | 107.7(4) |
| C(27)-C(24)-H(24)   | 115.1    | C(32)-C(31)-H(31)   | 126.2    |
| C(23)-C(24)-H(24)   | 115.1    | C(30)-C(31)-H(31)   | 126.2    |
| C(24)-C(25)-C(26)   | 114.2(4) | O(7)-C(32)-C(31)    | 114.4(4) |
| C(24)-C(25)-H(25A)  | 108.7    | O(7)-C(32)-C(33)    | 113.9(3) |

|                     |          |                     |          |
|---------------------|----------|---------------------|----------|
| C(31)-C(32)-C(33)   | 131.6(4) | C(36)-C(37)-H(37B)  | 109.5    |
| C(32)-C(33)-C(34)   | 120.4(4) | H(37A)-C(37)-H(37B) | 109.5    |
| C(32)-C(33)-C(36)   | 117.4(3) | C(36)-C(37)-H(37C)  | 109.5    |
| C(34)-C(33)-C(36)   | 89.0(3)  | H(37A)-C(37)-H(37C) | 109.5    |
| C(32)-C(33)-H(33)   | 109.5    | H(37B)-C(37)-H(37C) | 109.5    |
| C(34)-C(33)-H(33)   | 109.5    | C(36)-C(38)-H(38A)  | 109.5    |
| C(36)-C(33)-H(33)   | 109.5    | C(36)-C(38)-H(38B)  | 109.5    |
| C(33)-C(34)-C(35)   | 88.6(3)  | H(38A)-C(38)-H(38B) | 109.5    |
| C(33)-C(34)-H(34A)  | 113.9    | C(36)-C(38)-H(38C)  | 109.5    |
| C(35)-C(34)-H(34A)  | 113.9    | H(38A)-C(38)-H(38C) | 109.5    |
| C(33)-C(34)-H(34B)  | 113.9    | H(38B)-C(38)-H(38C) | 109.5    |
| C(35)-C(34)-H(34B)  | 113.9    | C(40)-C(39)-C(35)   | 115.8(4) |
| H(34A)-C(34)-H(34B) | 111.1    | C(40)-C(39)-H(39A)  | 108.3    |
| C(39)-C(35)-C(34)   | 116.6(4) | C(35)-C(39)-H(39A)  | 108.3    |
| C(39)-C(35)-C(36)   | 120.3(3) | C(40)-C(39)-H(39B)  | 108.3    |
| C(34)-C(35)-C(36)   | 89.6(3)  | C(35)-C(39)-H(39B)  | 108.3    |
| C(39)-C(35)-H(35)   | 109.6    | H(39A)-C(39)-H(39B) | 107.4    |
| C(34)-C(35)-H(35)   | 109.6    | O(9)-C(40)-O(10)    | 123.6(4) |
| C(36)-C(35)-H(35)   | 109.6    | O(9)-C(40)-C(39)    | 124.7(4) |
| C(38)-C(36)-C(37)   | 111.2(3) | O(10)-C(40)-C(39)   | 111.7(4) |
| C(38)-C(36)-C(35)   | 114.0(3) | C(6)-O(1)-H(1)      | 109.5    |
| C(37)-C(36)-C(35)   | 116.2(3) | C(12)-O(2)-C(1)     | 108.5(3) |
| C(38)-C(36)-C(33)   | 112.9(3) | C(20)-O(5)-H(5)     | 109.5    |
| C(37)-C(36)-C(33)   | 114.1(4) | C(26)-O(6)-H(6A)    | 109.5    |
| C(35)-C(36)-C(33)   | 86.3(3)  | C(32)-O(7)-C(21)    | 108.5(3) |
| C(36)-C(37)-H(37A)  | 109.5    | C(40)-O(10)-H(10)   | 109.5    |

---

Symmetry transformations used to generate equivalent atoms:



Table 4. Anisotropic displacement parameters ( $\text{\AA}^2 \times 10^3$ ) for maimone23. The anisotropic displacement factor exponent takes the form:  $-2\pi^2 [h^2 a^{*2} U^{11} + \dots + 2 h k a^* b^* U^{12}]$

|       | $U^{11}$ | $U^{22}$ | $U^{33}$ | $U^{23}$ | $U^{13}$ | $U^{12}$ |
|-------|----------|----------|----------|----------|----------|----------|
| C(1)  | 28(2)    | 31(2)    | 34(2)    | 2(2)     | 2(2)     | -3(2)    |
| C(2)  | 29(2)    | 37(2)    | 34(2)    | 0(2)     | 0(2)     | 5(2)     |
| C(3)  | 29(2)    | 43(2)    | 32(2)    | 4(2)     | 2(2)     | 4(2)     |
| C(4)  | 35(3)    | 52(3)    | 34(2)    | 10(2)    | 2(2)     | -2(2)    |
| C(5)  | 50(3)    | 37(2)    | 45(2)    | 6(2)     | -2(2)    | -8(2)    |
| C(6)  | 30(3)    | 38(2)    | 43(2)    | 1(2)     | 1(2)     | 8(2)     |
| C(7)  | 26(2)    | 71(3)    | 36(2)    | -5(2)    | 7(2)     | -5(2)    |
| C(8)  | 42(3)    | 61(3)    | 36(2)    | -3(2)    | 1(2)     | 2(3)     |
| C(9)  | 37(3)    | 50(3)    | 38(2)    | 0(2)     | -7(2)    | 0(2)     |
| C(10) | 31(2)    | 27(2)    | 33(2)    | -7(2)    | 3(2)     | 4(2)     |
| C(11) | 42(3)    | 31(2)    | 28(2)    | -4(2)    | -2(2)    | 4(2)     |
| C(12) | 39(3)    | 25(2)    | 28(2)    | -6(2)    | 5(2)     | 7(2)     |
| C(13) | 38(3)    | 31(2)    | 31(2)    | -3(2)    | 2(2)     | 2(2)     |
| C(14) | 49(3)    | 39(2)    | 30(2)    | -5(2)    | 2(2)     | -1(2)    |
| C(15) | 32(3)    | 33(2)    | 37(2)    | -1(2)    | 1(2)     | 1(2)     |
| C(16) | 32(2)    | 30(2)    | 33(2)    | -2(2)    | 1(2)     | 1(2)     |
| C(17) | 37(3)    | 33(2)    | 34(2)    | -3(2)    | -2(2)    | -1(2)    |
| C(18) | 41(3)    | 39(2)    | 38(2)    | 2(2)     | -3(2)    | 0(2)     |
| C(19) | 39(3)    | 33(2)    | 45(2)    | 7(2)     | -4(2)    | 2(2)     |
| C(20) | 47(3)    | 32(2)    | 40(2)    | 5(2)     | 0(2)     | 3(2)     |
| C(21) | 27(2)    | 17(2)    | 37(2)    | 3(2)     | -4(2)    | -5(2)    |
| C(22) | 29(2)    | 18(2)    | 48(2)    | 4(2)     | -7(2)    | 1(2)     |
| C(23) | 32(2)    | 24(2)    | 36(2)    | -1(2)    | -1(2)    | -1(2)    |
| C(24) | 55(3)    | 25(2)    | 38(2)    | -5(2)    | -8(2)    | -11(2)   |
| C(25) | 31(3)    | 39(2)    | 47(3)    | 1(2)     | -12(2)   | -11(2)   |
| C(26) | 32(3)    | 26(2)    | 46(2)    | 10(2)    | -4(2)    | 2(2)     |
| C(27) | 37(3)    | 18(2)    | 55(3)    | -1(2)    | 1(2)     | -1(2)    |
| C(28) | 44(3)    | 29(2)    | 50(3)    | -2(2)    | -1(2)    | 3(2)     |
| C(29) | 39(3)    | 31(2)    | 32(2)    | 1(2)     | -2(2)    | 2(2)     |
| C(30) | 31(2)    | 26(2)    | 40(2)    | 6(2)     | -3(2)    | -7(2)    |

|       |       |       |        |       |        |        |
|-------|-------|-------|--------|-------|--------|--------|
| C(31) | 35(3) | 34(2) | 31(2)  | 5(2)  | -2(2)  | -13(2) |
| C(32) | 26(2) | 31(2) | 32(2)  | -3(2) | 5(2)   | -4(2)  |
| C(33) | 31(2) | 24(2) | 32(2)  | -2(2) | 6(2)   | -1(2)  |
| C(34) | 45(3) | 35(2) | 30(2)  | -6(2) | 9(2)   | -11(2) |
| C(35) | 32(2) | 28(2) | 32(2)  | -4(2) | 8(2)   | -8(2)  |
| C(36) | 31(2) | 18(2) | 31(2)  | -1(2) | 1(2)   | 1(2)   |
| C(37) | 43(3) | 26(2) | 39(2)  | 3(2)  | 0(2)   | -2(2)  |
| C(38) | 26(2) | 21(2) | 36(2)  | 0(2)  | 5(2)   | -2(2)  |
| C(39) | 47(3) | 25(2) | 32(2)  | -2(2) | 1(2)   | -9(2)  |
| C(40) | 33(3) | 27(2) | 37(2)  | -5(2) | 1(2)   | -4(2)  |
| O(1)  | 60(2) | 35(2) | 43(2)  | -5(1) | 2(2)   | 12(2)  |
| O(2)  | 30(2) | 34(2) | 31(1)  | 2(1)  | 0(1)   | 1(1)   |
| O(3)  | 34(2) | 34(2) | 48(2)  | -7(1) | -6(1)  | 2(2)   |
| O(4)  | 94(3) | 36(2) | 116(3) | 15(2) | -68(3) | -13(2) |
| O(5)  | 46(2) | 32(2) | 105(3) | 8(2)  | -24(2) | -8(2)  |
| O(6)  | 31(2) | 38(2) | 56(2)  | 8(2)  | 1(2)   | -3(2)  |
| O(7)  | 32(2) | 18(1) | 32(1)  | 1(1)  | -2(1)  | -1(1)  |
| O(8)  | 43(2) | 29(2) | 49(2)  | 12(1) | -10(2) | -10(2) |
| O(9)  | 53(2) | 44(2) | 46(2)  | 13(2) | -8(2)  | -23(2) |
| O(10) | 34(2) | 30(2) | 66(2)  | 11(2) | -1(2)  | -7(2)  |

---

Table 5. Hydrogen coordinates ( $\times 10^4$ ) and isotropic displacement parameters ( $\text{\AA}^2 \times 10^{-3}$ ) for maimone23.

|        | x     | y     | z    | U(eq) |
|--------|-------|-------|------|-------|
| H(2)   | -1191 | 12842 | 2875 | 40    |
| H(4)   | -1376 | 15931 | 2483 | 48    |
| H(5A)  | -3833 | 16871 | 2759 | 53    |
| H(5B)  | -1677 | 17215 | 2861 | 53    |
| H(6)   | -4637 | 15822 | 3086 | 44    |
| H(7A)  | 978   | 14381 | 2664 | 53    |
| H(7B)  | 637   | 15296 | 2910 | 53    |
| H(8A)  | -2630 | 12387 | 2440 | 70    |
| H(8B)  | -752  | 13336 | 2400 | 70    |
| H(8C)  | -2791 | 13662 | 2263 | 70    |
| H(9A)  | -5580 | 14506 | 2481 | 63    |
| H(9B)  | -5519 | 14776 | 2771 | 63    |
| H(9C)  | -5568 | 13277 | 2669 | 63    |
| H(11)  | -1542 | 12710 | 3618 | 41    |
| H(13)  | -6695 | 12592 | 3497 | 40    |
| H(14A) | -5690 | 11379 | 3836 | 47    |
| H(14B) | -3794 | 10738 | 3692 | 47    |
| H(15)  | -7954 | 10227 | 3598 | 41    |
| H(17A) | -4829 | 9343  | 3086 | 52    |
| H(17B) | -3294 | 10118 | 3258 | 52    |
| H(17C) | -4124 | 10819 | 3015 | 52    |
| H(18A) | -7602 | 11712 | 3008 | 59    |
| H(18B) | -9047 | 11385 | 3233 | 59    |
| H(18C) | -8337 | 10213 | 3053 | 59    |
| H(19A) | -4750 | 8417  | 3510 | 47    |
| H(19B) | -6057 | 8381  | 3755 | 47    |
| H(22)  | -2613 | 10005 | 4539 | 38    |
| H(24)  | 711   | 11667 | 5002 | 47    |
| H(25A) | 3465  | 10344 | 4862 | 47    |
| H(25B) | 3296  | 11644 | 4692 | 47    |

|        |       |       |      |    |
|--------|-------|-------|------|----|
| H(26)  | 3025  | 9009  | 4559 | 42 |
| H(27A) | 16    | 12115 | 4510 | 44 |
| H(27B) | -1824 | 12193 | 4705 | 44 |
| H(28A) | -3386 | 9351  | 5023 | 62 |
| H(28B) | -3176 | 10924 | 4979 | 62 |
| H(28C) | -2027 | 10228 | 5202 | 62 |
| H(29A) | 437   | 8497  | 5112 | 51 |
| H(29B) | 1365  | 8354  | 4842 | 51 |
| H(29C) | -817  | 7809  | 4896 | 51 |
| H(31)  | -968  | 8918  | 3844 | 40 |
| H(33)  | 288   | 5918  | 4165 | 35 |
| H(34A) | -943  | 5531  | 3776 | 44 |
| H(34B) | -2650 | 6674  | 3803 | 44 |
| H(35)  | -2454 | 4130  | 4055 | 37 |
| H(37A) | -1696 | 5715  | 4633 | 54 |
| H(37B) | -1099 | 4458  | 4467 | 54 |
| H(37C) | -3311 | 4601  | 4569 | 54 |
| H(38A) | -5518 | 6431  | 4386 | 42 |
| H(38B) | -4592 | 7403  | 4182 | 42 |
| H(38C) | -3847 | 7485  | 4462 | 42 |
| H(39A) | -5967 | 5644  | 3969 | 42 |
| H(39B) | -5198 | 4557  | 3777 | 42 |
| H(1)   | -1369 | 16850 | 3264 | 69 |
| H(5)   | -7893 | 5897  | 3431 | 91 |
| H(6A)  | 3591  | 11118 | 4284 | 62 |
| H(10)  | -8714 | 2885  | 4056 | 65 |

---

### X-Ray crystallographic Analysis 13

A colorless plate 0.050 x 0.040 x 0.020 mm in size was mounted on a Cryoloop with Paratone oil. Data were collected in a nitrogen gas stream at 100(2) K using phi and omega scans. Crystal-to-detector distance was 60 mm and exposure time was 10 seconds per frame using a scan width of 1.0°. Data collection was 100.0% complete to 67.000° in  $\theta$ . A total of 28889 reflections were collected covering the indices,  $-8 \leq h \leq 8$ ,  $-10 \leq k \leq 11$ ,  $-33 \leq l \leq 33$ . 3424 reflections were found to be symmetry independent, with an  $R_{\text{int}}$  of 0.0362. Indexing and unit cell refinement indicated a primitive, orthorhombic lattice. The space group was found to be P 21 21 21 (No. 19). The data were integrated using the Bruker SAINT software program and scaled using the SADABS software program. Solution by iterative methods (SHELXT) produced a complete heavy-atom phasing model consistent with the proposed structure. All non-hydrogen atoms were refined anisotropically by full-matrix least-squares (SHELXL-2014). All hydrogen atoms were placed using a riding model. Their positions were constrained relative to their parent atom using the appropriate HFIX command in SHELXL-2014. Absolute stereochemistry was unambiguously determined to be *R* at C3, C5, C13, and C15, and *S* at C1 and C6, respectively.

Table 1. Crystal data and structure refinement for **13**.

|                                   |                                             |                       |
|-----------------------------------|---------------------------------------------|-----------------------|
| X-ray ID                          | maimone24                                   |                       |
| Sample/notebook ID                | XH-211-3                                    |                       |
| Empirical formula                 | C20 H28 O5                                  |                       |
| Formula weight                    | 348.42                                      |                       |
| Temperature                       | 100(2) K                                    |                       |
| Wavelength                        | 1.54178 Å                                   |                       |
| Crystal system                    | Orthorhombic                                |                       |
| Space group                       | P 21 21 21                                  |                       |
| Unit cell dimensions              | a = 6.8100(3) Å                             | $\alpha = 90^\circ$ . |
|                                   | b = 9.9666(4) Å                             | $\beta = 90^\circ$ .  |
|                                   | c = 27.5837(12) Å                           | $\gamma = 90^\circ$ . |
| Volume                            | 1872.18(14) Å <sup>3</sup>                  |                       |
| Z                                 | 4                                           |                       |
| Density (calculated)              | 1.236 Mg/m <sup>3</sup>                     |                       |
| Absorption coefficient            | 0.713 mm <sup>-1</sup>                      |                       |
| F(000)                            | 752                                         |                       |
| Crystal size                      | 0.050 x 0.040 x 0.020 mm <sup>3</sup>       |                       |
| Crystal color/habit               | colorless plate                             |                       |
| Theta range for data collection   | 3.204 to 68.390°.                           |                       |
| Index ranges                      | -8 ≤ h ≤ 8, -10 ≤ k ≤ 11, -33 ≤ l ≤ 33      |                       |
| Reflections collected             | 28889                                       |                       |
| Independent reflections           | 3424 [R(int) = 0.0362]                      |                       |
| Completeness to theta = 67.000°   | 100.0 %                                     |                       |
| Absorption correction             | Semi-empirical from equivalents             |                       |
| Max. and min. transmission        | 0.929 and 0.896                             |                       |
| Refinement method                 | Full-matrix least-squares on F <sup>2</sup> |                       |
| Data / restraints / parameters    | 3424 / 0 / 232                              |                       |
| Goodness-of-fit on F <sup>2</sup> | 1.037                                       |                       |
| Final R indices [I > 2σ(I)]       | R1 = 0.0364, wR2 = 0.0951                   |                       |
| R indices (all data)              | R1 = 0.0377, wR2 = 0.0963                   |                       |
| Absolute structure parameter      | 0.01(5)                                     |                       |
| Extinction coefficient            | n/a                                         |                       |
| Largest diff. peak and hole       | 0.260 and -0.139 e.Å <sup>-3</sup>          |                       |

Table 2. Atomic coordinates ( $\times 10^4$ ) and equivalent isotropic displacement parameters ( $\text{\AA}^2 \times 10^3$ ) for maimone24.  $U(\text{eq})$  is defined as one third of the trace of the orthogonalized  $U^{ij}$  tensor.

|       | x        | y        | z       | $U(\text{eq})$ |
|-------|----------|----------|---------|----------------|
| C(1)  | 4048(3)  | 3660(2)  | 978(1)  | 26(1)          |
| C(2)  | 3849(4)  | 3972(3)  | 435(1)  | 33(1)          |
| C(3)  | 1713(4)  | 4016(2)  | 272(1)  | 30(1)          |
| C(4)  | 668(4)   | 5235(2)  | 520(1)  | 27(1)          |
| C(5)  | 417(3)   | 4259(2)  | 964(1)  | 23(1)          |
| C(6)  | 2259(3)  | 4144(2)  | 1285(1) | 23(1)          |
| C(7)  | 1787(3)  | 3201(2)  | 1706(1) | 25(1)          |
| C(8)  | 2528(3)  | 1868(2)  | 1701(1) | 26(1)          |
| C(9)  | 3746(3)  | 1433(2)  | 1348(1) | 24(1)          |
| C(10) | 453(4)   | 3079(2)  | 594(1)  | 28(1)          |
| C(11) | -1337(4) | 5516(3)  | 290(1)  | 39(1)          |
| C(12) | 1750(4)  | 6559(2)  | 555(1)  | 34(1)          |
| C(13) | 4417(3)  | 20(2)    | 1289(1) | 25(1)          |
| C(14) | 3615(3)  | -1093(2) | 1618(1) | 27(1)          |
| C(15) | 5643(3)  | -1785(2) | 1582(1) | 23(1)          |
| C(16) | 6563(3)  | -401(2)  | 1446(1) | 25(1)          |
| C(17) | 7293(4)  | 382(3)   | 1885(1) | 34(1)          |
| C(18) | 8084(4)  | -389(3)  | 1044(1) | 36(1)          |
| C(19) | 6275(4)  | -2602(2) | 2019(1) | 27(1)          |
| C(20) | 8049(4)  | -3452(2) | 1933(1) | 26(1)          |
| O(1)  | 4437(2)  | 2210(2)  | 992(1)  | 29(1)          |
| O(2)  | 2852(2)  | 5388(2)  | 1486(1) | 29(1)          |
| O(3)  | 706(3)   | 3606(2)  | 2036(1) | 35(1)          |
| O(4)  | 9351(3)  | -3181(2) | 1648(1) | 35(1)          |
| O(5)  | 8050(3)  | -4559(2) | 2198(1) | 36(1)          |

Table 3. Bond lengths [Å] and angles [°] for maimone24.

|                |            |                 |            |
|----------------|------------|-----------------|------------|
| C(1)-O(1)      | 1.470(3)   | C(11)-H(11C)    | 0.9800     |
| C(1)-C(2)      | 1.536(3)   | C(12)-H(12A)    | 0.9800     |
| C(1)-C(6)      | 1.559(3)   | C(12)-H(12B)    | 0.9800     |
| C(1)-H(1)      | 1.0000     | C(12)-H(12C)    | 0.9800     |
| C(2)-C(3)      | 1.523(4)   | C(13)-C(14)     | 1.533(3)   |
| C(2)-H(2A)     | 0.9900     | C(13)-C(16)     | 1.581(3)   |
| C(2)-H(2B)     | 0.9900     | C(13)-H(13)     | 1.0000     |
| C(3)-C(10)     | 1.548(3)   | C(14)-C(15)     | 1.547(3)   |
| C(3)-C(4)      | 1.564(3)   | C(14)-H(14A)    | 0.9900     |
| C(3)-H(3)      | 1.0000     | C(14)-H(14B)    | 0.9900     |
| C(4)-C(12)     | 1.514(3)   | C(15)-C(19)     | 1.518(3)   |
| C(4)-C(11)     | 1.531(4)   | C(15)-C(16)     | 1.560(3)   |
| C(4)-C(5)      | 1.574(3)   | C(15)-H(15)     | 1.0000     |
| C(5)-C(6)      | 1.539(3)   | C(16)-C(18)     | 1.518(3)   |
| C(5)-C(10)     | 1.558(3)   | C(16)-C(17)     | 1.525(3)   |
| C(5)-H(5)      | 1.0000     | C(17)-H(17A)    | 0.9800     |
| C(6)-O(2)      | 1.417(3)   | C(17)-H(17B)    | 0.9800     |
| C(6)-C(7)      | 1.528(3)   | C(17)-H(17C)    | 0.9800     |
| C(7)-O(3)      | 1.239(3)   | C(18)-H(18A)    | 0.9800     |
| C(7)-C(8)      | 1.421(3)   | C(18)-H(18B)    | 0.9800     |
| C(8)-C(9)      | 1.351(3)   | C(18)-H(18C)    | 0.9800     |
| C(8)-H(8)      | 0.9500     | C(19)-C(20)     | 1.495(3)   |
| C(9)-O(1)      | 1.337(3)   | C(19)-H(19A)    | 0.9900     |
| C(9)-C(13)     | 1.489(3)   | C(19)-H(19B)    | 0.9900     |
| C(10)-H(10A)   | 0.9900     | C(20)-O(4)      | 1.215(3)   |
| C(10)-H(10B)   | 0.9900     | C(20)-O(5)      | 1.323(3)   |
| C(11)-H(11A)   | 0.9800     | O(2)-H(2)       | 0.8400     |
| C(11)-H(11B)   | 0.9800     | O(5)-H(5A)      | 0.8400     |
| O(1)-C(1)-C(2) | 103.80(19) | C(6)-C(1)-H(1)  | 107.9      |
| O(1)-C(1)-C(6) | 115.56(18) | C(3)-C(2)-C(1)  | 112.18(19) |
| C(2)-C(1)-C(6) | 113.44(19) | C(3)-C(2)-H(2A) | 109.2      |
| O(1)-C(1)-H(1) | 107.9      | C(1)-C(2)-H(2A) | 109.2      |
| C(2)-C(1)-H(1) | 107.9      | C(3)-C(2)-H(2B) | 109.2      |



|                  |            |                     |            |
|------------------|------------|---------------------|------------|
| C(1)-C(2)-H(2B)  | 109.2      | C(3)-C(10)-H(10A)   | 114.3      |
| H(2A)-C(2)-H(2B) | 107.9      | C(5)-C(10)-H(10A)   | 114.3      |
| C(2)-C(3)-C(10)  | 110.03(19) | C(3)-C(10)-H(10B)   | 114.3      |
| C(2)-C(3)-C(4)   | 109.18(19) | C(5)-C(10)-H(10B)   | 114.3      |
| C(10)-C(3)-C(4)  | 88.07(18)  | H(10A)-C(10)-H(10B) | 111.5      |
| C(2)-C(3)-H(3)   | 115.5      | C(4)-C(11)-H(11A)   | 109.5      |
| C(10)-C(3)-H(3)  | 115.5      | C(4)-C(11)-H(11B)   | 109.5      |
| C(4)-C(3)-H(3)   | 115.5      | H(11A)-C(11)-H(11B) | 109.5      |
| C(12)-C(4)-C(11) | 107.5(2)   | C(4)-C(11)-H(11C)   | 109.5      |
| C(12)-C(4)-C(3)  | 118.9(2)   | H(11A)-C(11)-H(11C) | 109.5      |
| C(11)-C(4)-C(3)  | 111.6(2)   | H(11B)-C(11)-H(11C) | 109.5      |
| C(12)-C(4)-C(5)  | 122.8(2)   | C(4)-C(12)-H(12A)   | 109.5      |
| C(11)-C(4)-C(5)  | 109.8(2)   | C(4)-C(12)-H(12B)   | 109.5      |
| C(3)-C(4)-C(5)   | 84.82(17)  | H(12A)-C(12)-H(12B) | 109.5      |
| C(6)-C(5)-C(10)  | 107.90(18) | C(4)-C(12)-H(12C)   | 109.5      |
| C(6)-C(5)-C(4)   | 113.91(18) | H(12A)-C(12)-H(12C) | 109.5      |
| C(10)-C(5)-C(4)  | 87.36(16)  | H(12B)-C(12)-H(12C) | 109.5      |
| C(6)-C(5)-H(5)   | 114.8      | C(9)-C(13)-C(14)    | 120.74(19) |
| C(10)-C(5)-H(5)  | 114.8      | C(9)-C(13)-C(16)    | 120.30(19) |
| C(4)-C(5)-H(5)   | 114.8      | C(14)-C(13)-C(16)   | 88.60(16)  |
| O(2)-C(6)-C(7)   | 107.54(18) | C(9)-C(13)-H(13)    | 108.5      |
| O(2)-C(6)-C(5)   | 113.05(17) | C(14)-C(13)-H(13)   | 108.5      |
| C(7)-C(6)-C(5)   | 108.13(18) | C(16)-C(13)-H(13)   | 108.5      |
| O(2)-C(6)-C(1)   | 105.07(18) | C(13)-C(14)-C(15)   | 88.07(17)  |
| C(7)-C(6)-C(1)   | 112.72(18) | C(13)-C(14)-H(14A)  | 114.0      |
| C(5)-C(6)-C(1)   | 110.37(17) | C(15)-C(14)-H(14A)  | 114.0      |
| O(3)-C(7)-C(8)   | 121.5(2)   | C(13)-C(14)-H(14B)  | 114.0      |
| O(3)-C(7)-C(6)   | 118.9(2)   | C(15)-C(14)-H(14B)  | 114.0      |
| C(8)-C(7)-C(6)   | 119.53(19) | H(14A)-C(14)-H(14B) | 111.2      |
| C(9)-C(8)-C(7)   | 121.7(2)   | C(19)-C(15)-C(14)   | 116.15(19) |
| C(9)-C(8)-H(8)   | 119.1      | C(19)-C(15)-C(16)   | 123.41(19) |
| C(7)-C(8)-H(8)   | 119.1      | C(14)-C(15)-C(16)   | 88.87(16)  |
| O(1)-C(9)-C(8)   | 124.0(2)   | C(19)-C(15)-H(15)   | 108.9      |
| O(1)-C(9)-C(13)  | 111.12(19) | C(14)-C(15)-H(15)   | 108.9      |
| C(8)-C(9)-C(13)  | 124.8(2)   | C(16)-C(15)-H(15)   | 108.9      |
| C(3)-C(10)-C(5)  | 85.93(17)  | C(18)-C(16)-C(17)   | 110.8(2)   |

|                     |            |                     |            |
|---------------------|------------|---------------------|------------|
| C(18)-C(16)-C(15)   | 117.11(19) | H(18A)-C(18)-H(18C) | 109.5      |
| C(17)-C(16)-C(15)   | 113.15(19) | H(18B)-C(18)-H(18C) | 109.5      |
| C(18)-C(16)-C(13)   | 115.4(2)   | C(20)-C(19)-C(15)   | 113.99(19) |
| C(17)-C(16)-C(13)   | 112.51(19) | C(20)-C(19)-H(19A)  | 108.8      |
| C(15)-C(16)-C(13)   | 85.91(16)  | C(15)-C(19)-H(19A)  | 108.8      |
| C(16)-C(17)-H(17A)  | 109.5      | C(20)-C(19)-H(19B)  | 108.8      |
| C(16)-C(17)-H(17B)  | 109.5      | C(15)-C(19)-H(19B)  | 108.8      |
| H(17A)-C(17)-H(17B) | 109.5      | H(19A)-C(19)-H(19B) | 107.6      |
| C(16)-C(17)-H(17C)  | 109.5      | O(4)-C(20)-O(5)     | 122.8(2)   |
| H(17A)-C(17)-H(17C) | 109.5      | O(4)-C(20)-C(19)    | 124.5(2)   |
| H(17B)-C(17)-H(17C) | 109.5      | O(5)-C(20)-C(19)    | 112.7(2)   |
| C(16)-C(18)-H(18A)  | 109.5      | C(9)-O(1)-C(1)      | 121.64(18) |
| C(16)-C(18)-H(18B)  | 109.5      | C(6)-O(2)-H(2)      | 109.5      |
| H(18A)-C(18)-H(18B) | 109.5      | C(20)-O(5)-H(5A)    | 109.5      |
| C(16)-C(18)-H(18C)  | 109.5      |                     |            |

---

Symmetry transformations used to generate equivalent atoms:

Table 4. Anisotropic displacement parameters ( $\text{\AA}^2 \times 10^3$ ) for maimone24. The anisotropic displacement factor exponent takes the form:  $-2\pi^2 [ h^2 a^{*2} U^{11} + \dots + 2 h k a^* b^* U^{12} ]$

|       | U <sup>11</sup> | U <sup>22</sup> | U <sup>33</sup> | U <sup>23</sup> | U <sup>13</sup> | U <sup>12</sup> |
|-------|-----------------|-----------------|-----------------|-----------------|-----------------|-----------------|
| C(1)  | 24(1)           | 18(1)           | 36(1)           | 1(1)            | 3(1)            | 2(1)            |
| C(2)  | 39(1)           | 24(1)           | 35(1)           | 2(1)            | 14(1)           | 5(1)            |
| C(3)  | 44(1)           | 23(1)           | 22(1)           | 1(1)            | 2(1)            | -1(1)           |
| C(4)  | 32(1)           | 24(1)           | 25(1)           | 5(1)            | 0(1)            | 3(1)            |
| C(5)  | 22(1)           | 21(1)           | 25(1)           | 3(1)            | 2(1)            | 0(1)            |
| C(6)  | 23(1)           | 17(1)           | 29(1)           | -1(1)           | -1(1)           | 3(1)            |
| C(7)  | 28(1)           | 26(1)           | 22(1)           | -1(1)           | -1(1)           | 6(1)            |
| C(8)  | 31(1)           | 22(1)           | 25(1)           | 3(1)            | -2(1)           | 6(1)            |
| C(9)  | 24(1)           | 21(1)           | 27(1)           | 2(1)            | -3(1)           | 4(1)            |
| C(10) | 34(1)           | 24(1)           | 27(1)           | 2(1)            | -4(1)           | -4(1)           |
| C(11) | 41(1)           | 42(2)           | 34(1)           | 10(1)           | -7(1)           | 9(1)            |
| C(12) | 47(2)           | 21(1)           | 34(1)           | 6(1)            | 7(1)            | 3(1)            |
| C(13) | 27(1)           | 22(1)           | 26(1)           | -3(1)           | -2(1)           | 6(1)            |
| C(14) | 26(1)           | 20(1)           | 36(1)           | 0(1)            | -2(1)           | 3(1)            |
| C(15) | 27(1)           | 19(1)           | 25(1)           | -1(1)           | -3(1)           | 4(1)            |
| C(16) | 24(1)           | 21(1)           | 29(1)           | 2(1)            | -1(1)           | 6(1)            |
| C(17) | 32(1)           | 24(1)           | 45(1)           | -3(1)           | -9(1)           | 1(1)            |
| C(18) | 33(1)           | 31(1)           | 44(1)           | 11(1)           | 9(1)            | 10(1)           |
| C(19) | 32(1)           | 22(1)           | 26(1)           | 2(1)            | 1(1)            | 5(1)            |
| C(20) | 31(1)           | 24(1)           | 23(1)           | -1(1)           | -3(1)           | 5(1)            |
| O(1)  | 32(1)           | 21(1)           | 35(1)           | 1(1)            | 8(1)            | 8(1)            |
| O(2)  | 30(1)           | 21(1)           | 38(1)           | -7(1)           | -2(1)           | 3(1)            |
| O(3)  | 49(1)           | 30(1)           | 26(1)           | 4(1)            | 7(1)            | 17(1)           |
| O(4)  | 34(1)           | 27(1)           | 43(1)           | 6(1)            | 7(1)            | 10(1)           |
| O(5)  | 48(1)           | 29(1)           | 31(1)           | 6(1)            | 9(1)            | 17(1)           |

Table 5. Hydrogen coordinates ( $\times 10^4$ ) and isotropic displacement parameters ( $\text{\AA}^2 \times 10^{-3}$ ) for maimone24.

|        | x     | y     | z    | U(eq) |
|--------|-------|-------|------|-------|
| H(1)   | 5244  | 4132  | 1101 | 31    |
| H(2A)  | 4474  | 4848  | 366  | 39    |
| H(2B)  | 4553  | 3277  | 247  | 39    |
| H(3)   | 1494  | 3929  | -85  | 35    |
| H(5)   | -845  | 4363  | 1146 | 27    |
| H(8)   | 2157  | 1268  | 1952 | 31    |
| H(10A) | 1150  | 2268  | 710  | 34    |
| H(10B) | -846  | 2851  | 456  | 34    |
| H(11A) | -2121 | 6072  | 510  | 59    |
| H(11B) | -2020 | 4666  | 231  | 59    |
| H(11C) | -1154 | 5990  | -18  | 59    |
| H(12A) | 995   | 7181  | 757  | 51    |
| H(12B) | 1910  | 6940  | 230  | 51    |
| H(12C) | 3045  | 6411  | 701  | 51    |
| H(13)  | 4212  | -252  | 944  | 30    |
| H(14A) | 2529  | -1616 | 1472 | 33    |
| H(14B) | 3273  | -788  | 1949 | 33    |
| H(15)  | 5657  | -2376 | 1289 | 28    |
| H(17A) | 7606  | 1304  | 1788 | 51    |
| H(17B) | 8473  | -50   | 2016 | 51    |
| H(17C) | 6268  | 397   | 2135 | 51    |
| H(18A) | 8288  | 534   | 932  | 54    |
| H(18B) | 7619  | -941  | 773  | 54    |
| H(18C) | 9325  | -754  | 1166 | 54    |
| H(19A) | 6551  | -1982 | 2291 | 32    |
| H(19B) | 5173  | -3188 | 2118 | 32    |
| H(2)   | 1857  | 5817  | 1578 | 44    |
| H(5A)  | 9021  | -5034 | 2122 | 54    |

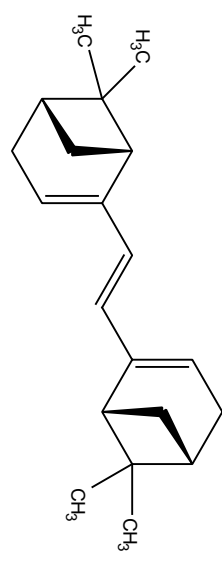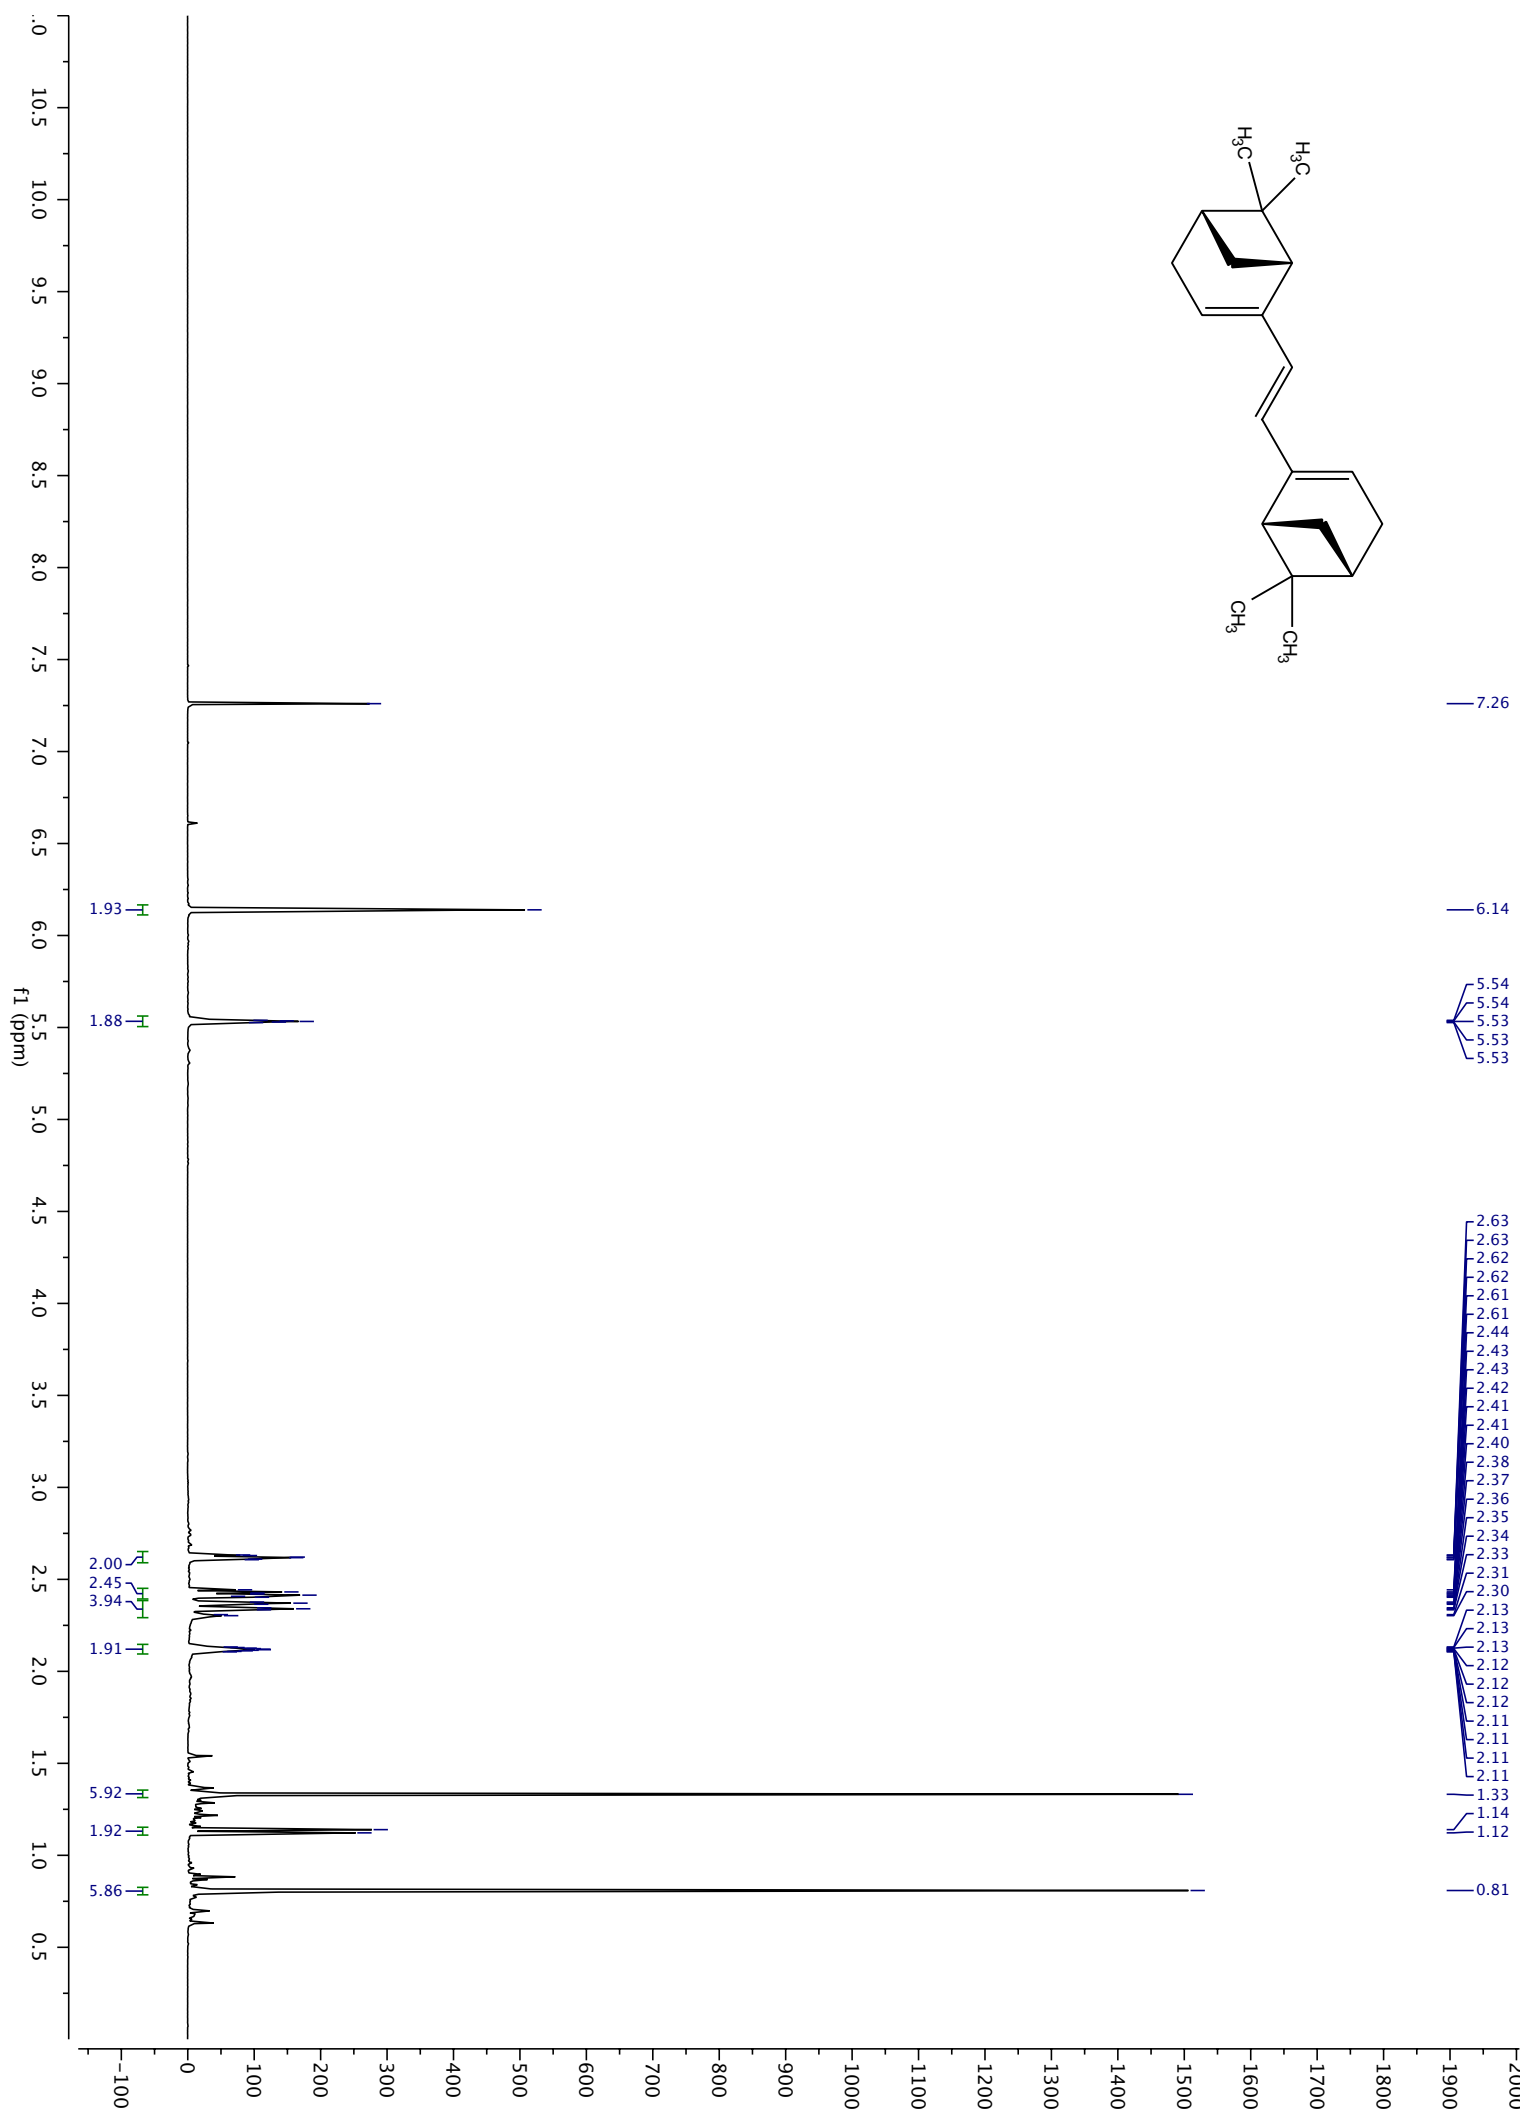

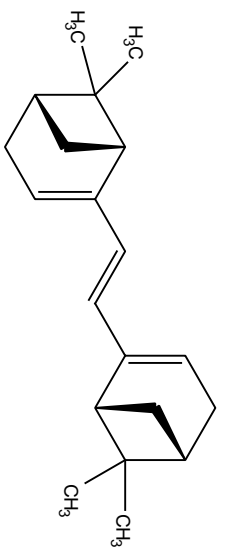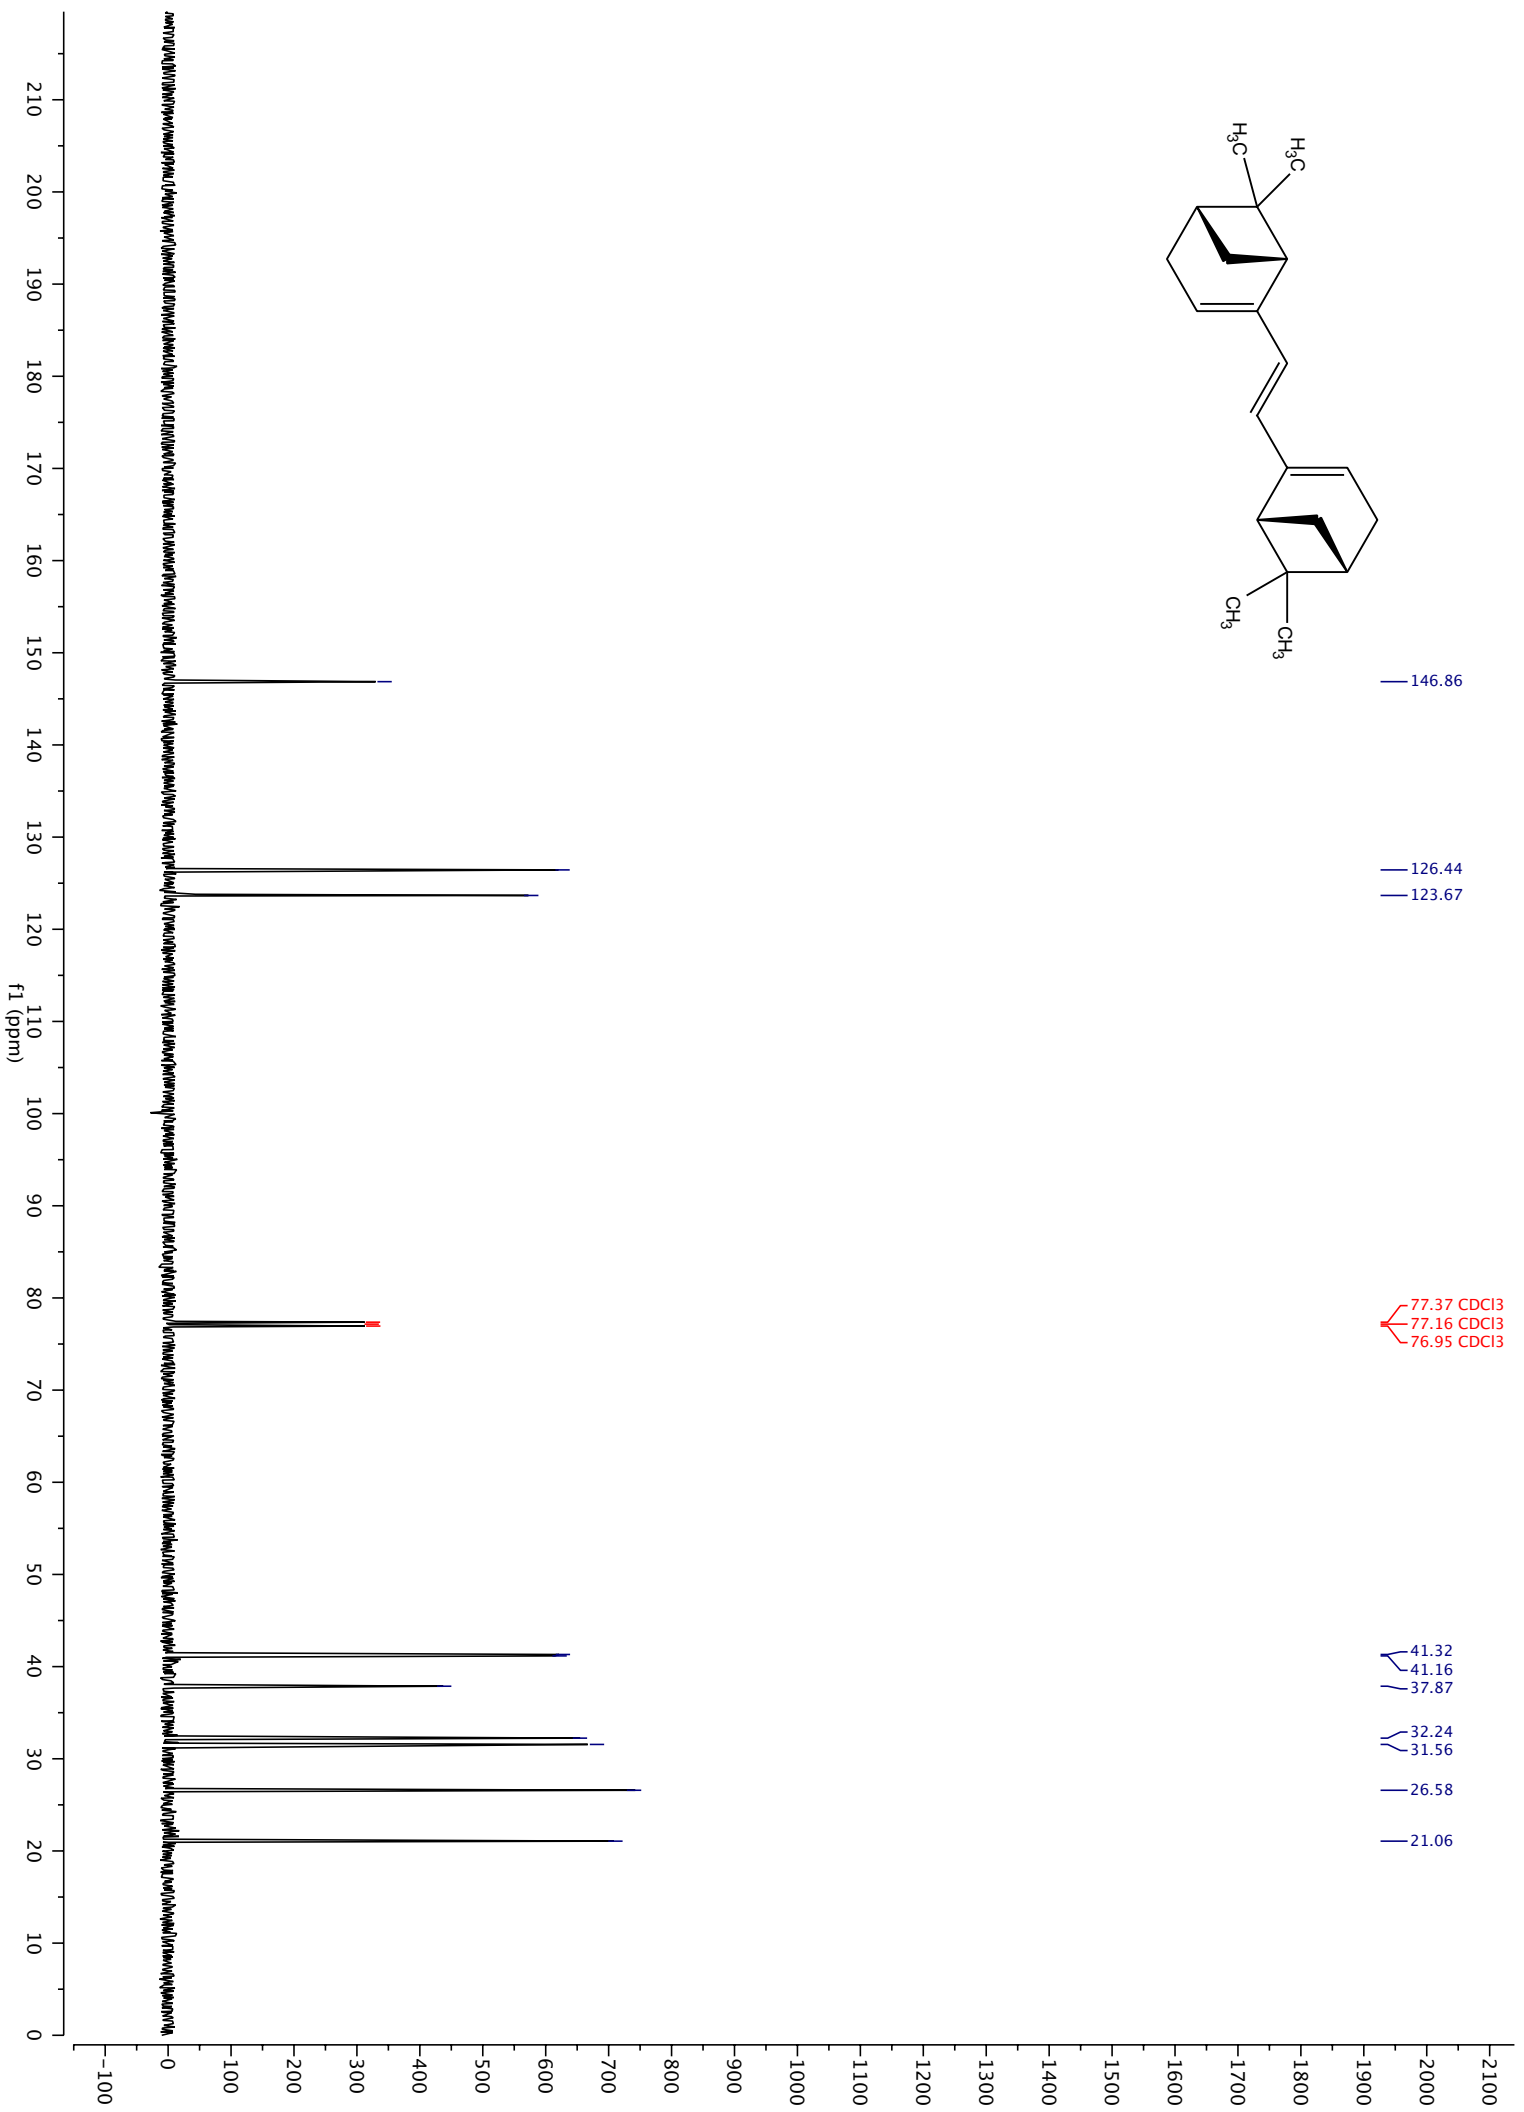

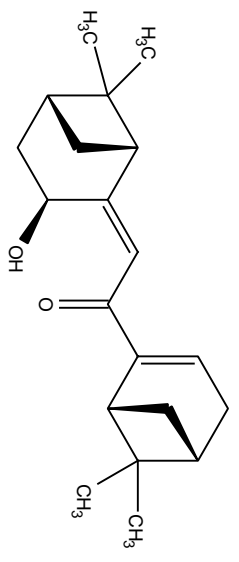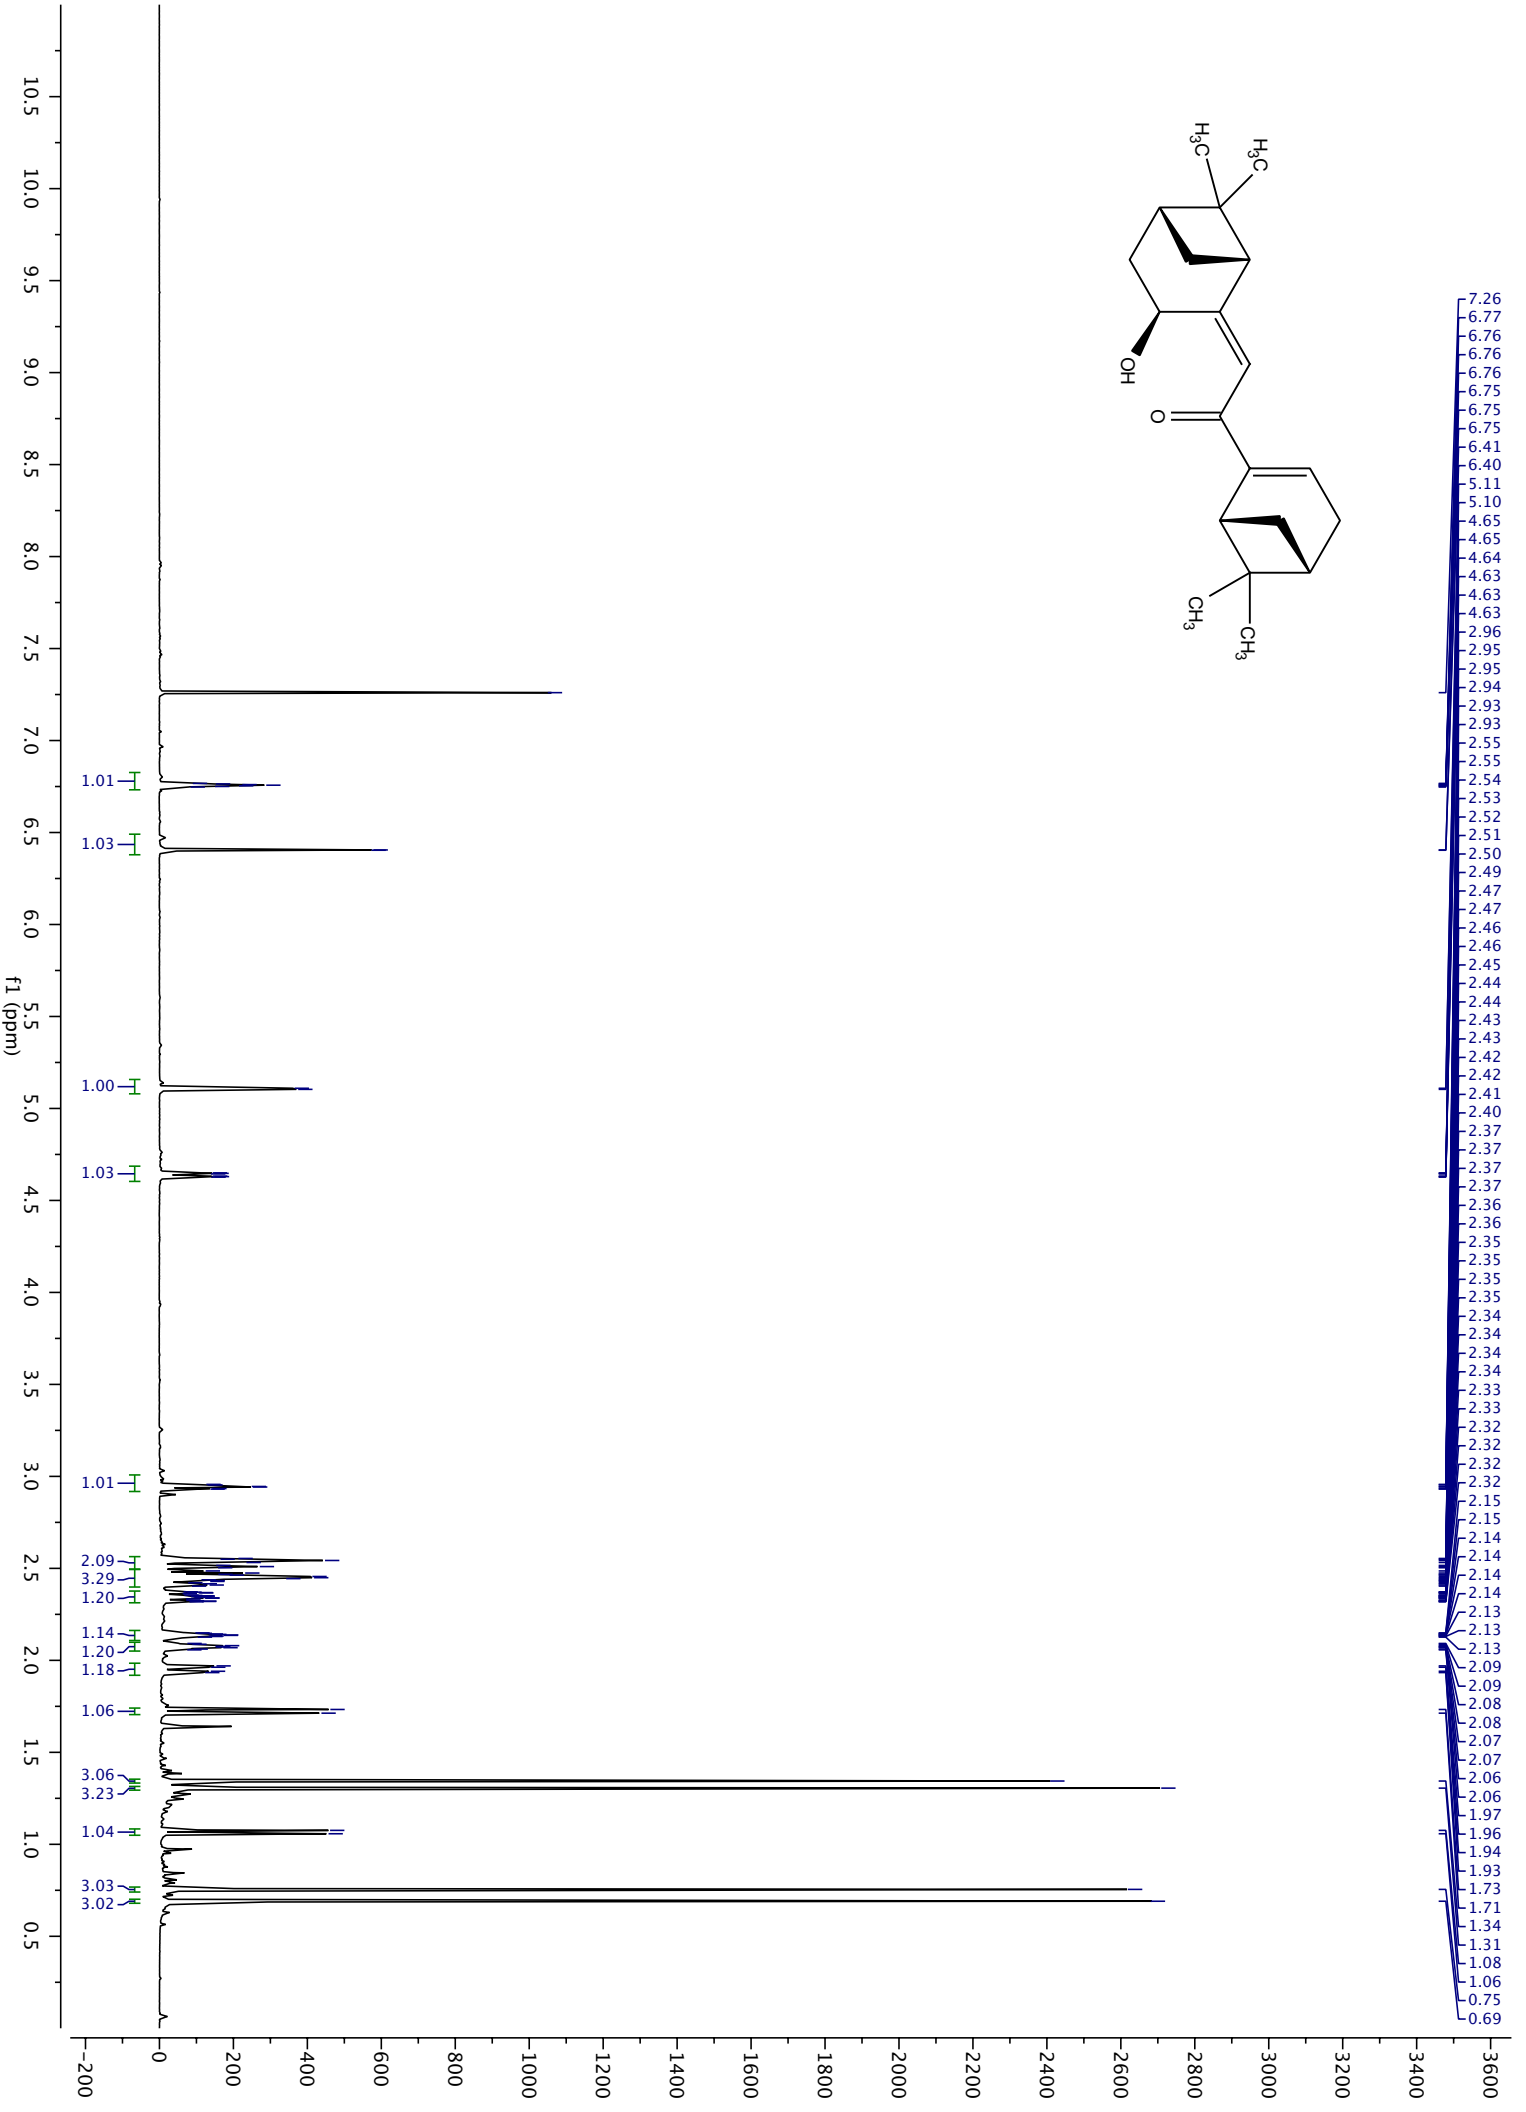

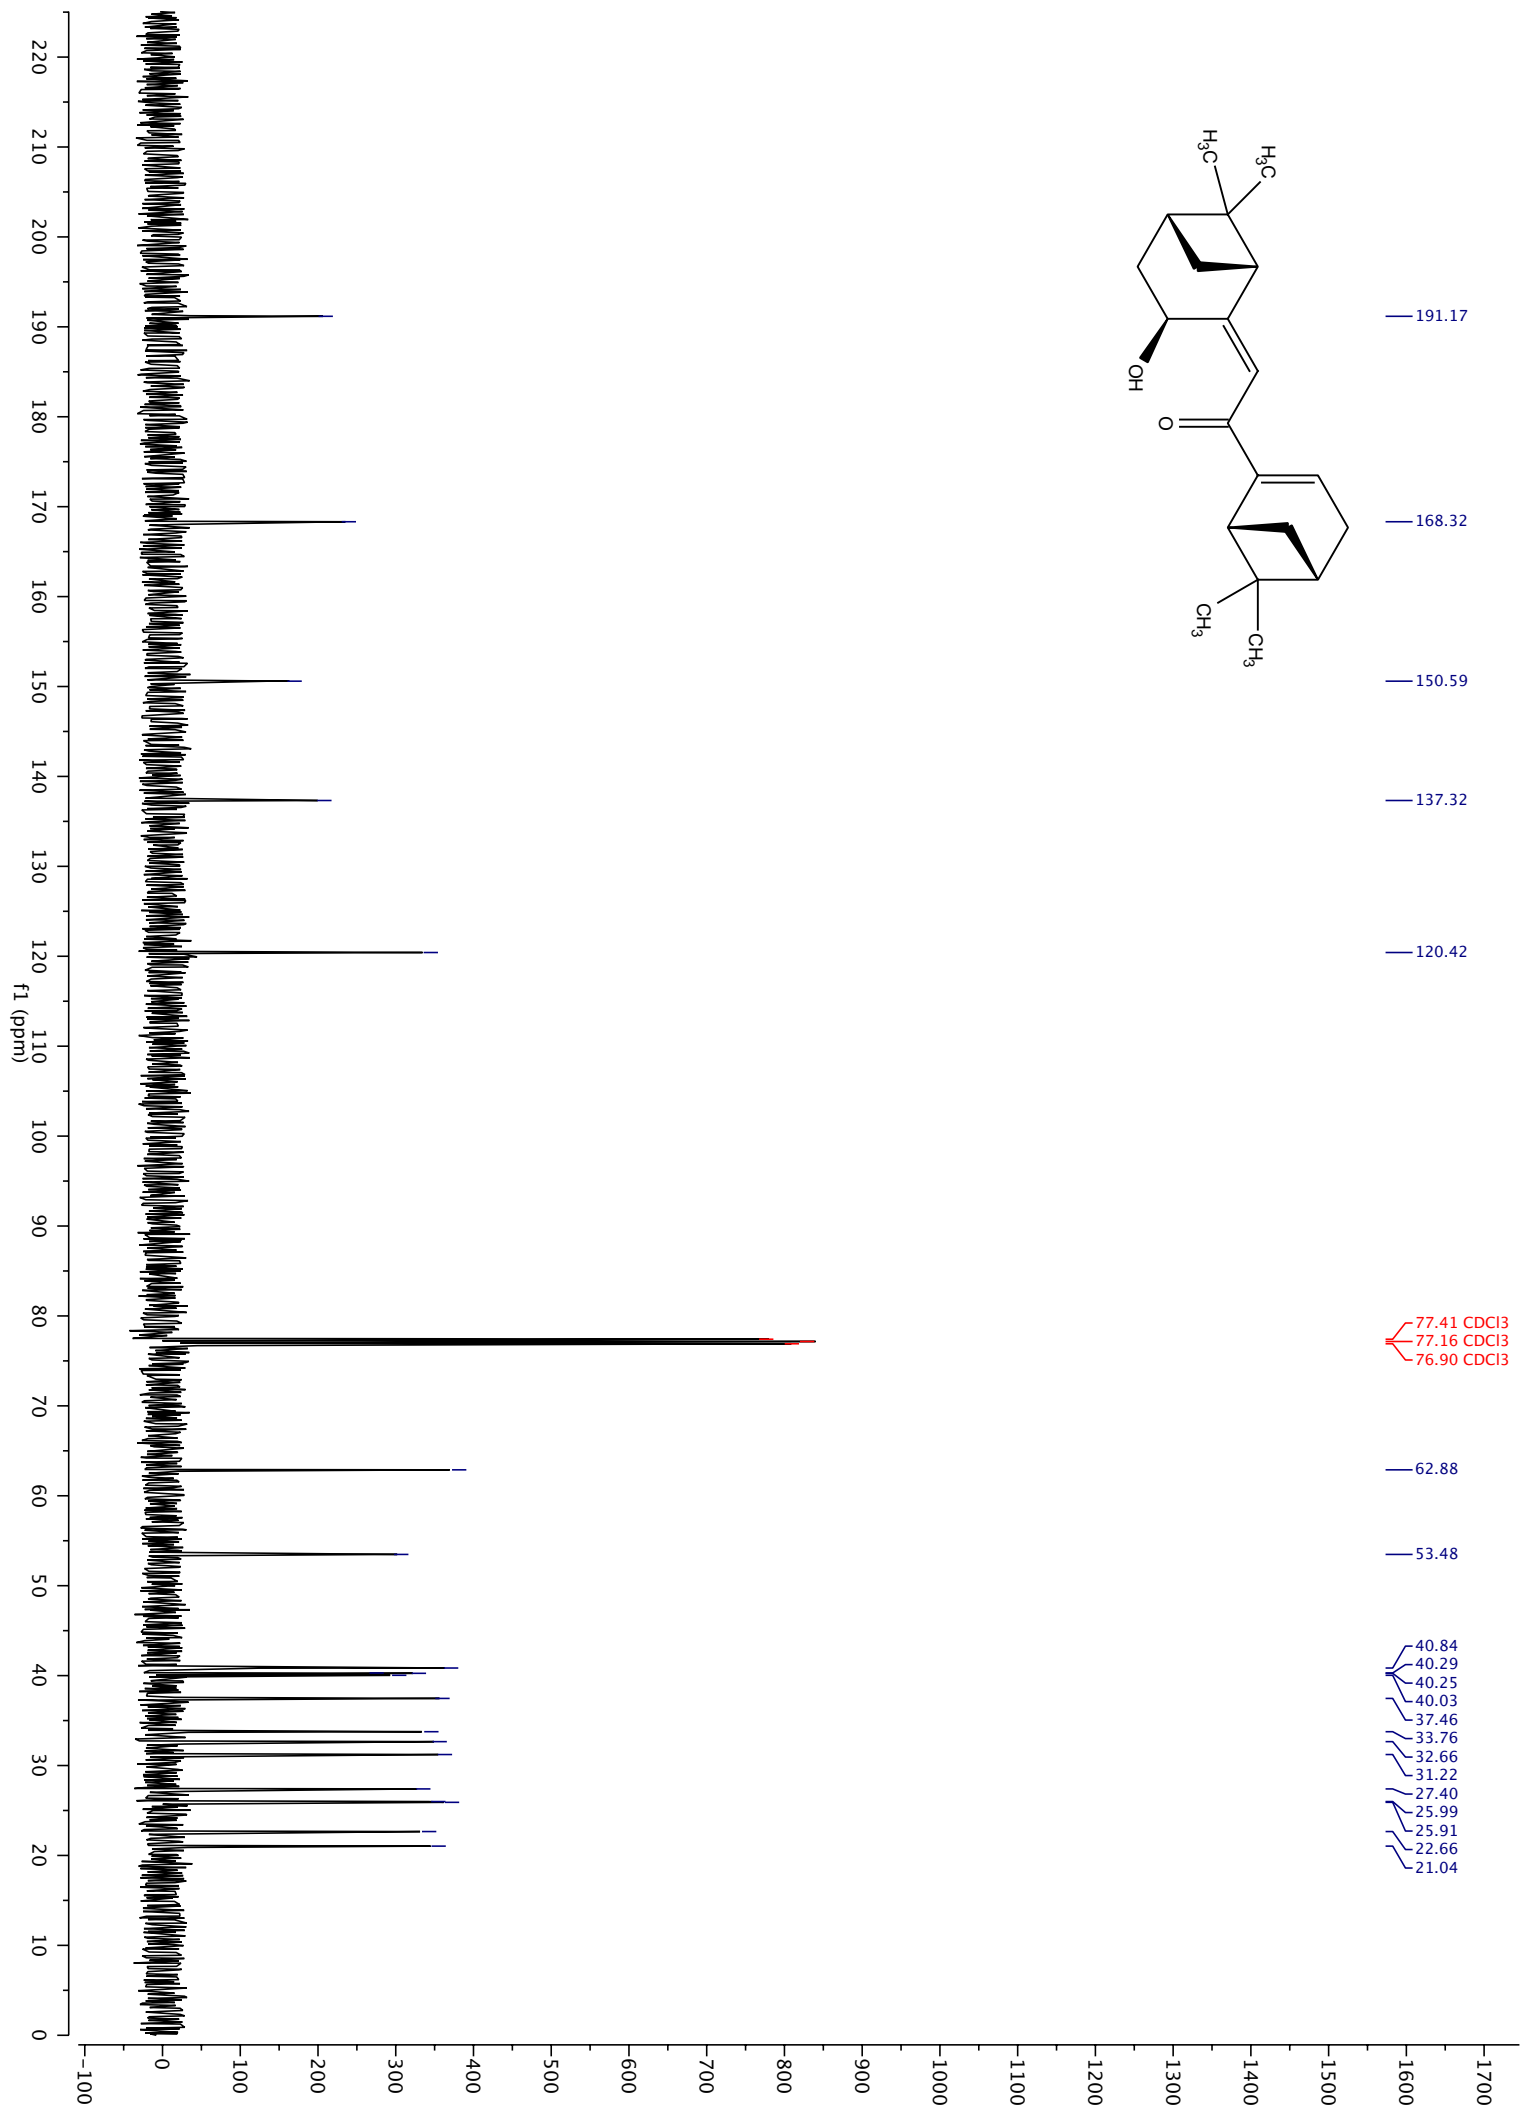



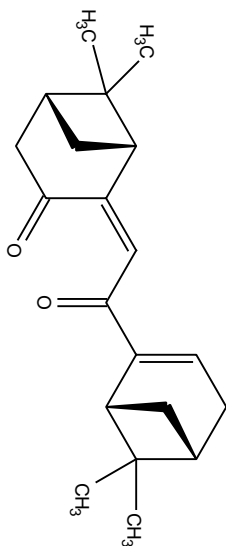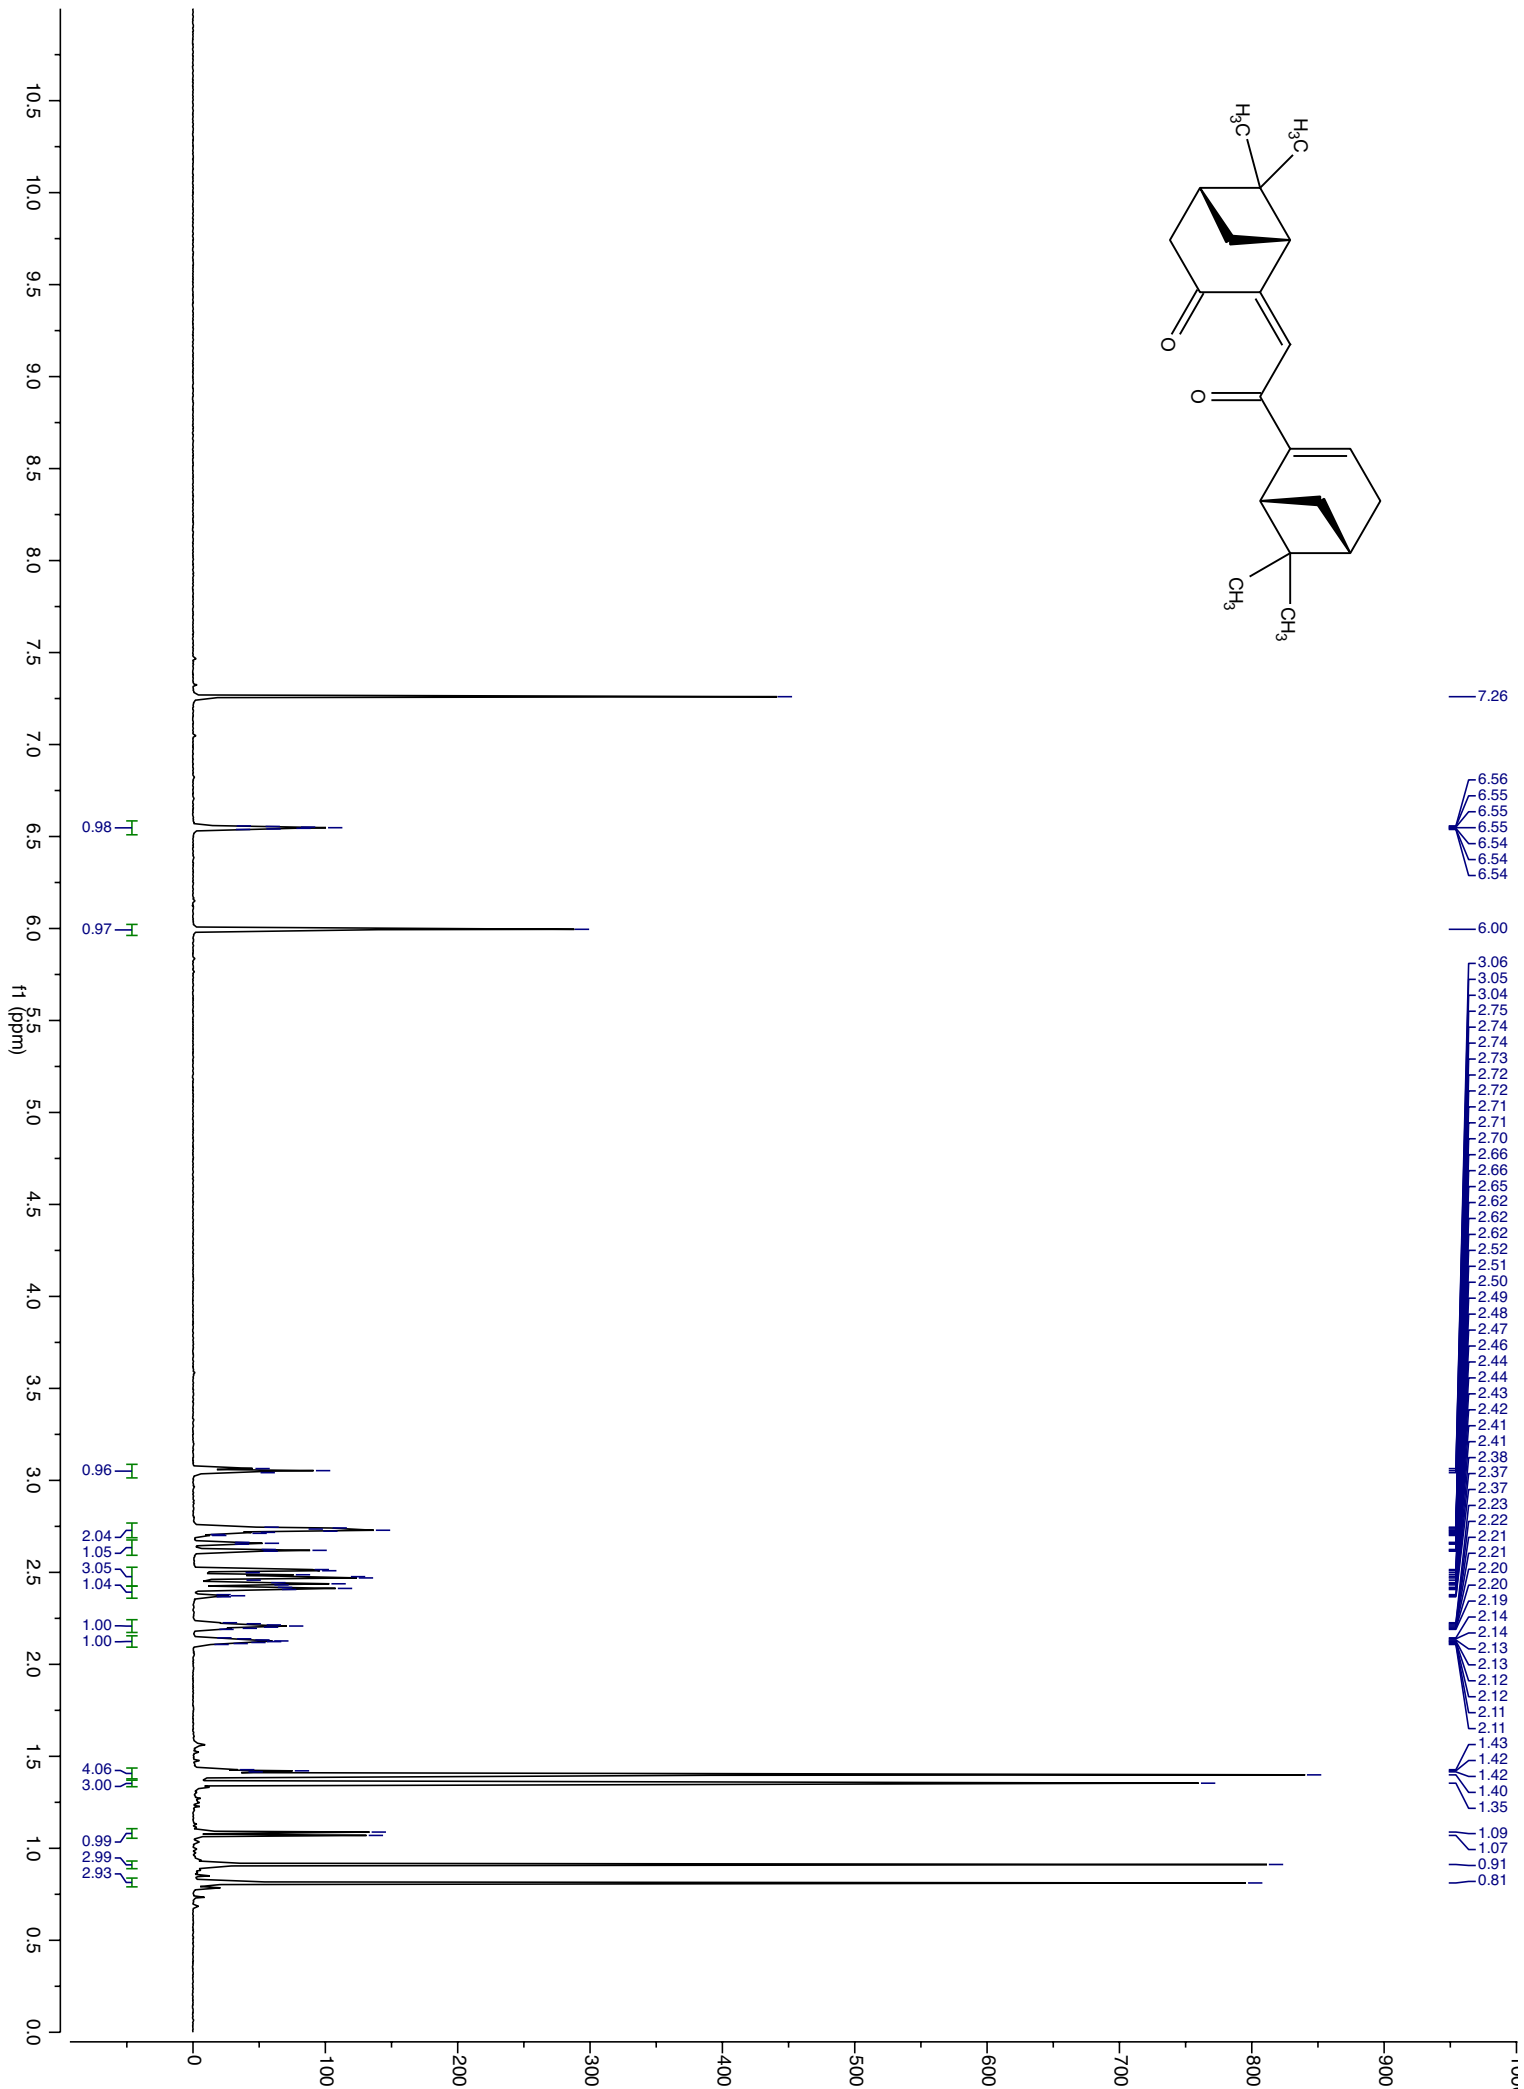

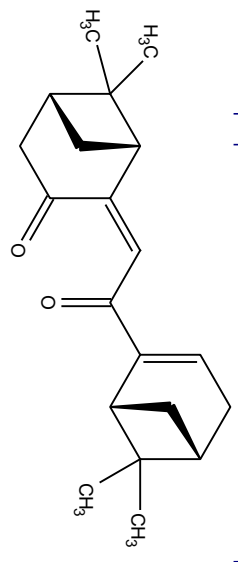

198.35  
195.00

149.66  
144.99  
138.18  
132.79

77.41 CDCl<sub>3</sub>  
77.16 CDCl<sub>3</sub>  
76.90 CDCl<sub>3</sub>

48.93  
42.55  
41.31  
40.75  
39.28  
38.37  
37.92  
32.65  
32.29  
31.19  
26.06  
22.09  
21.07

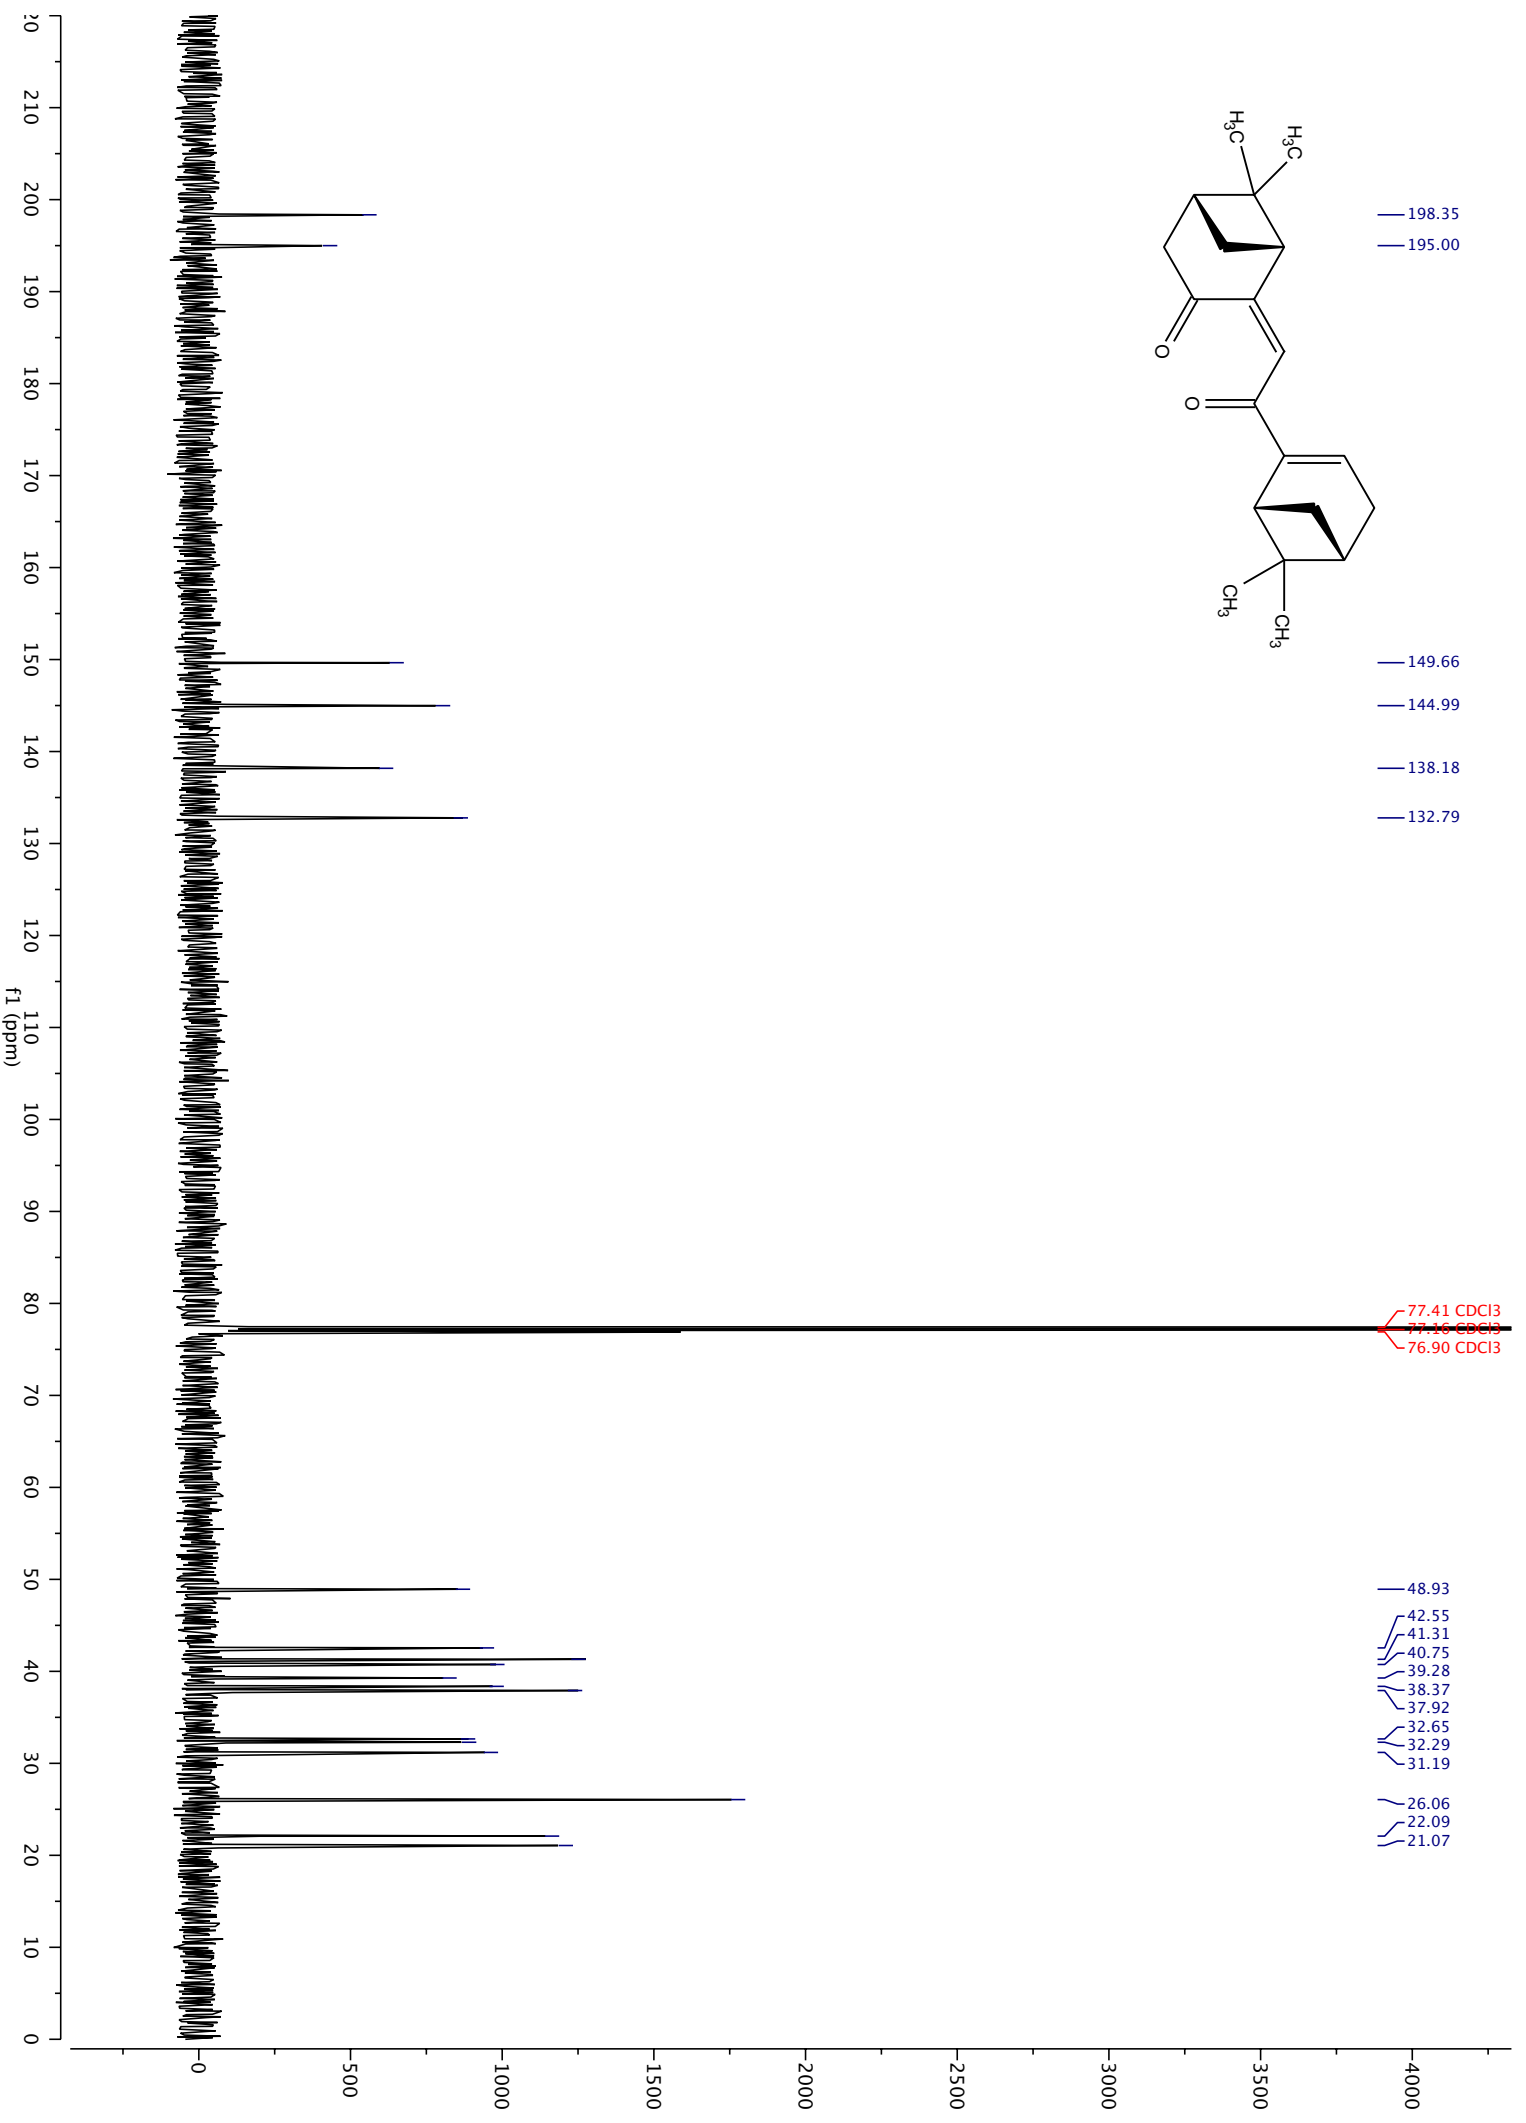

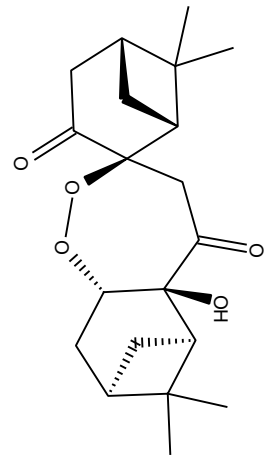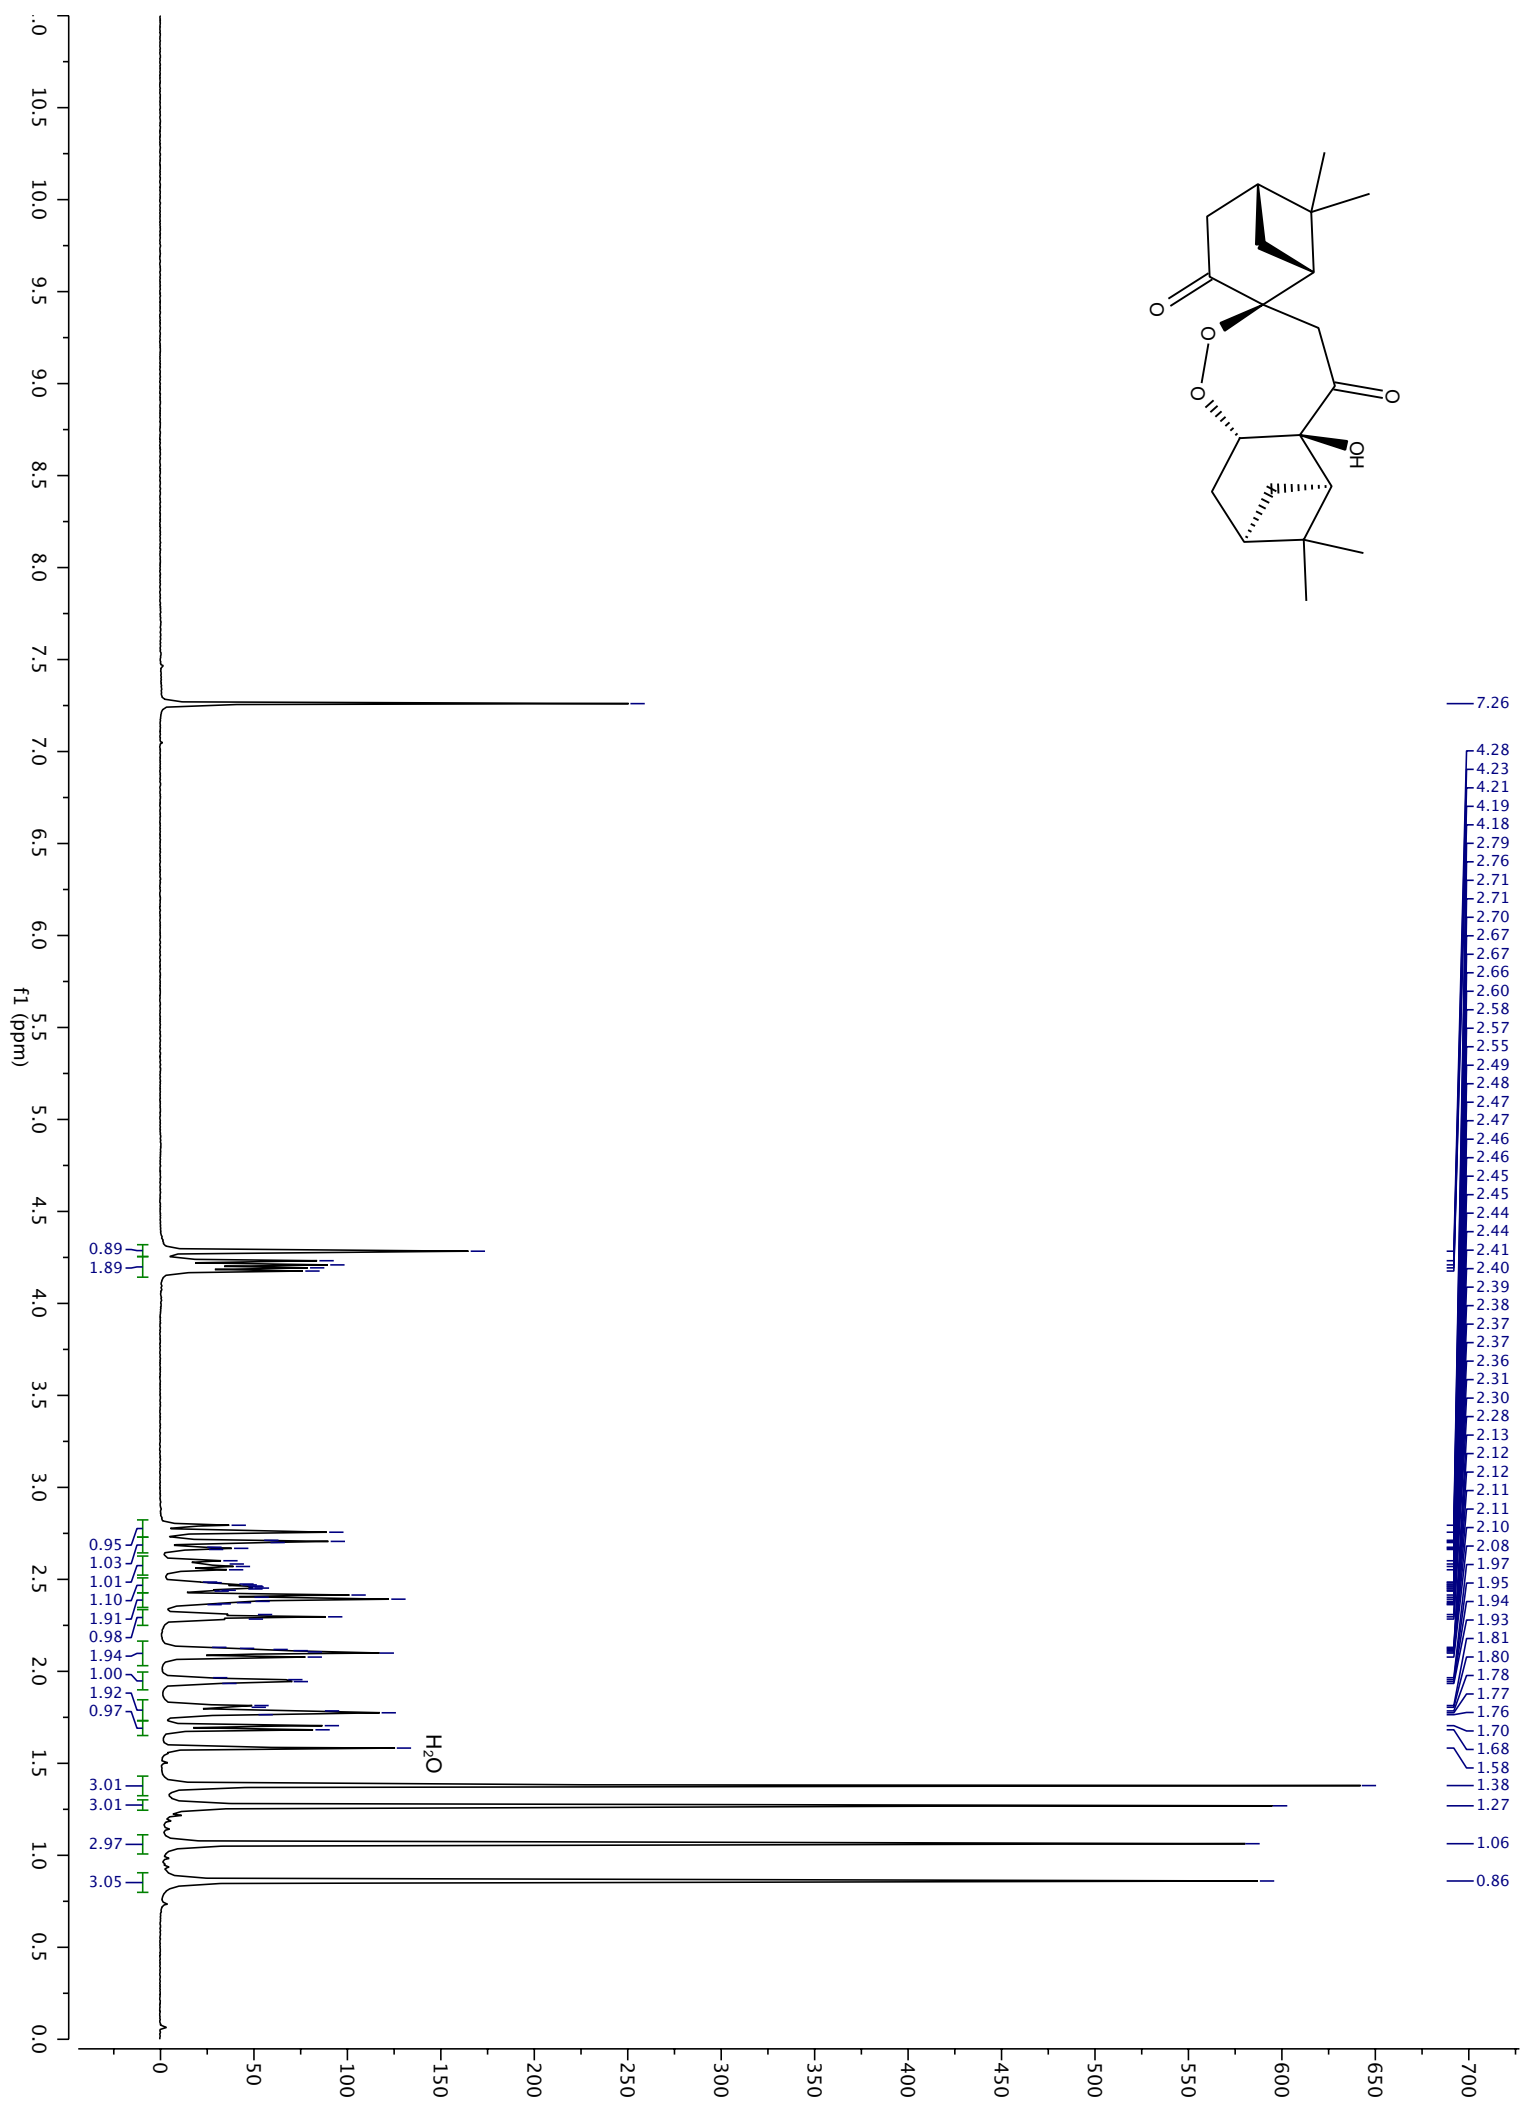

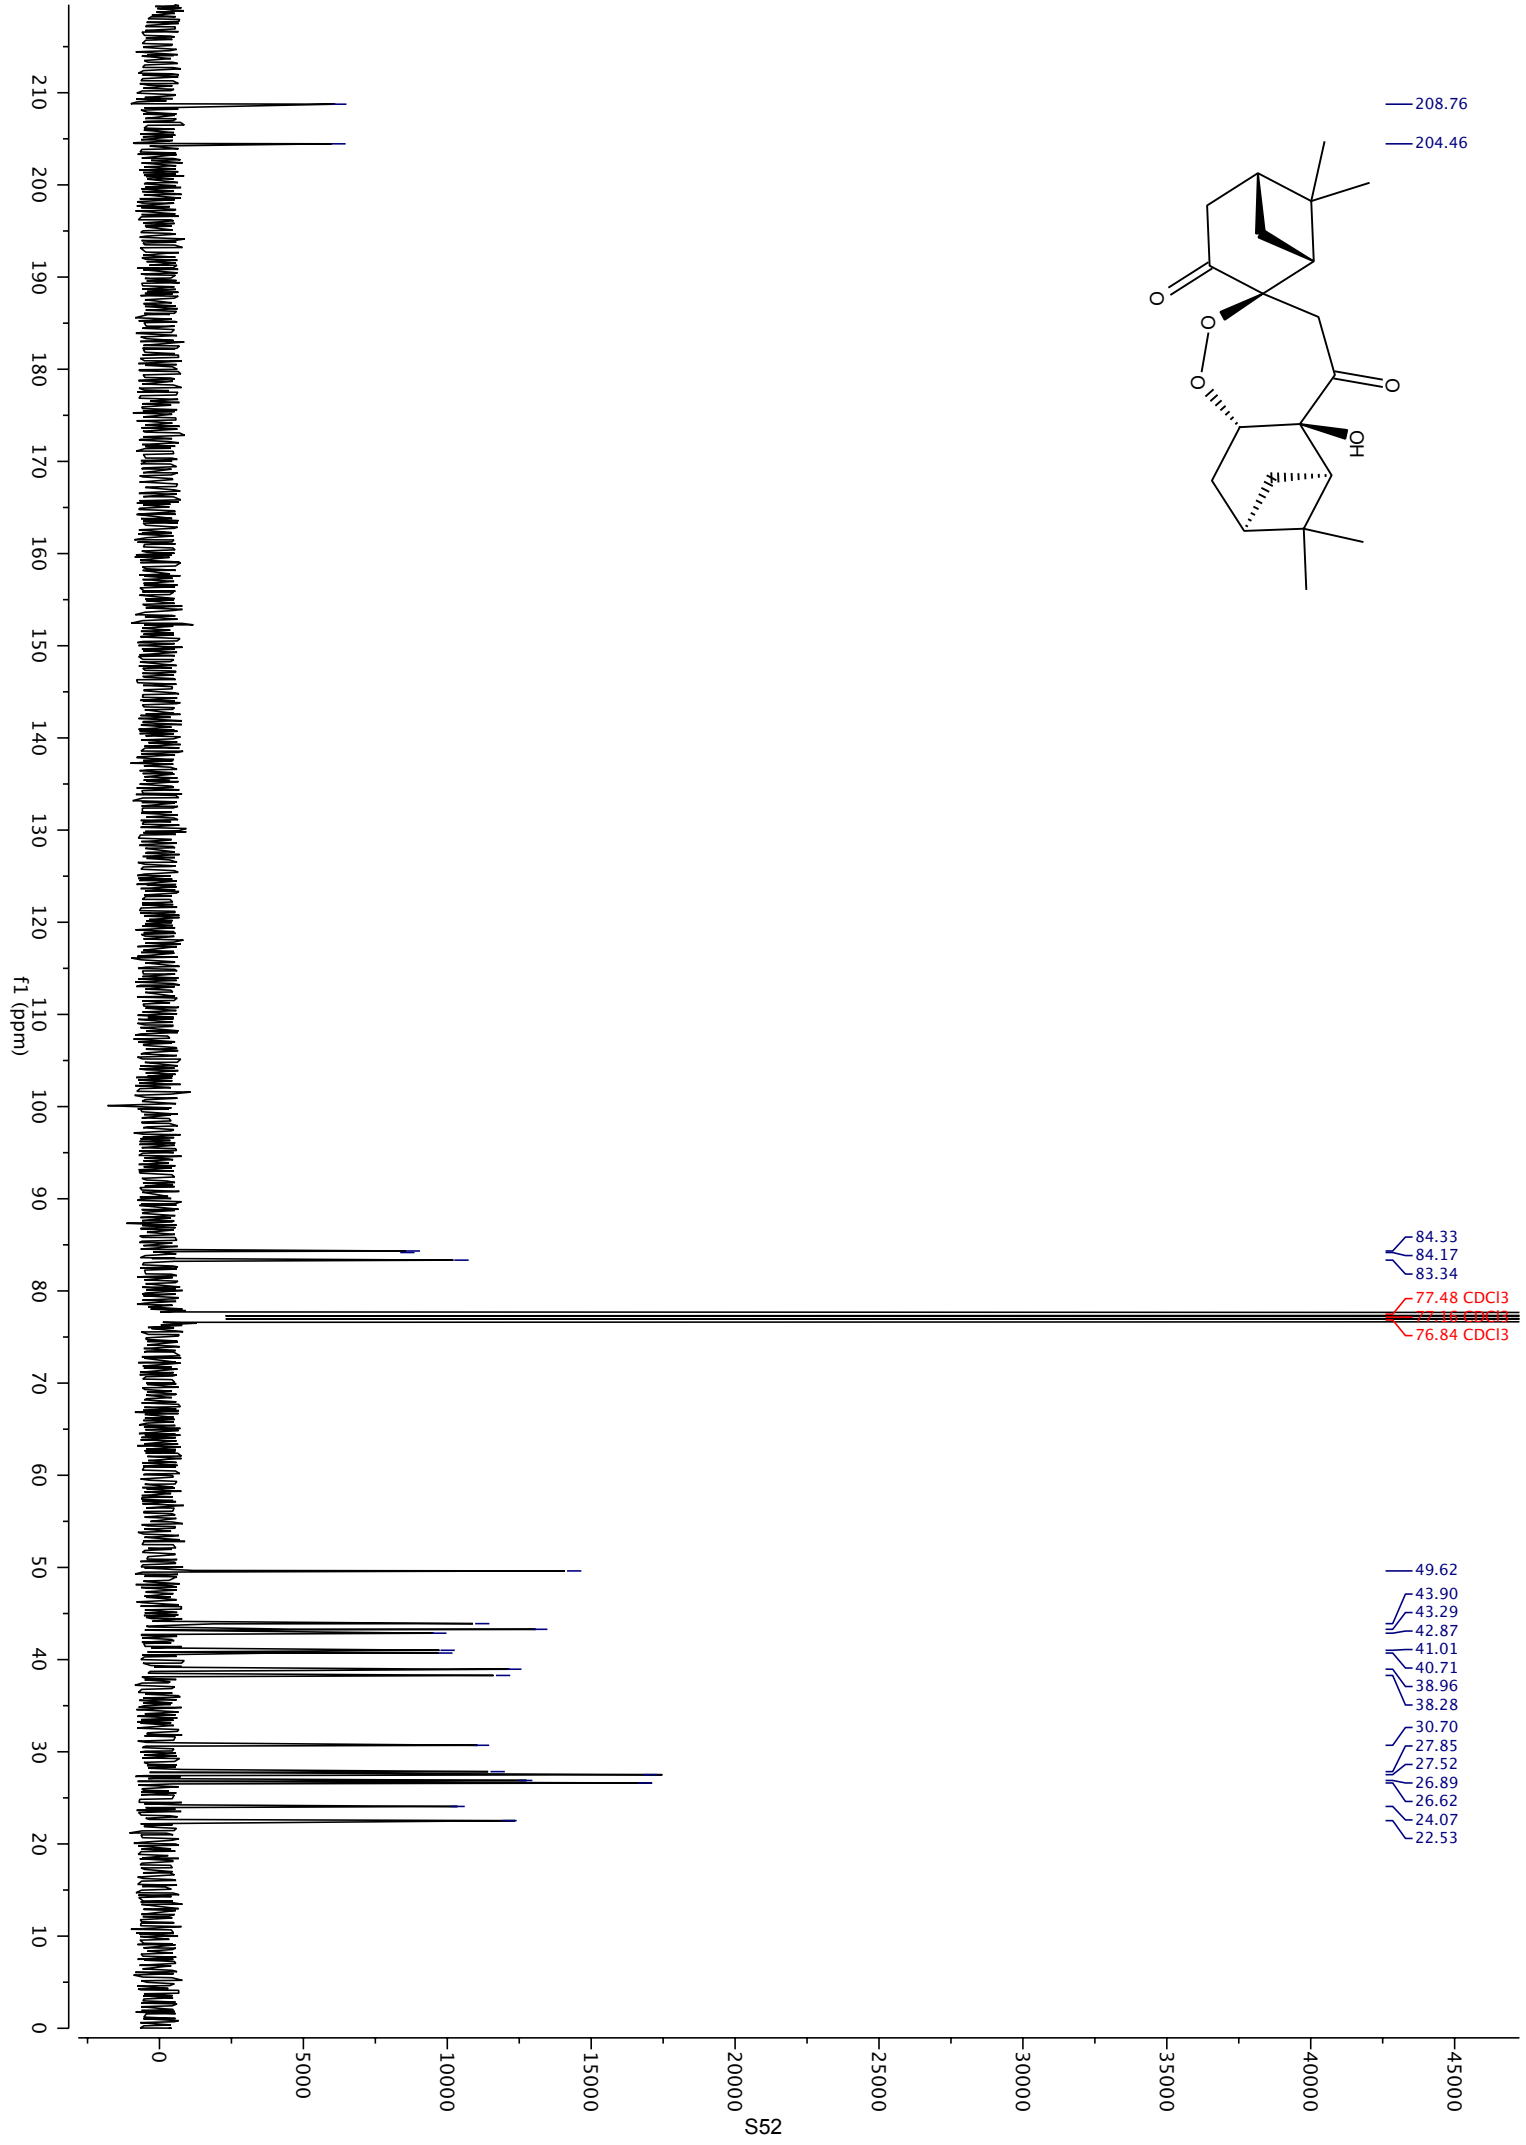

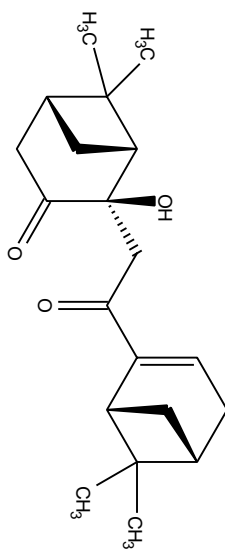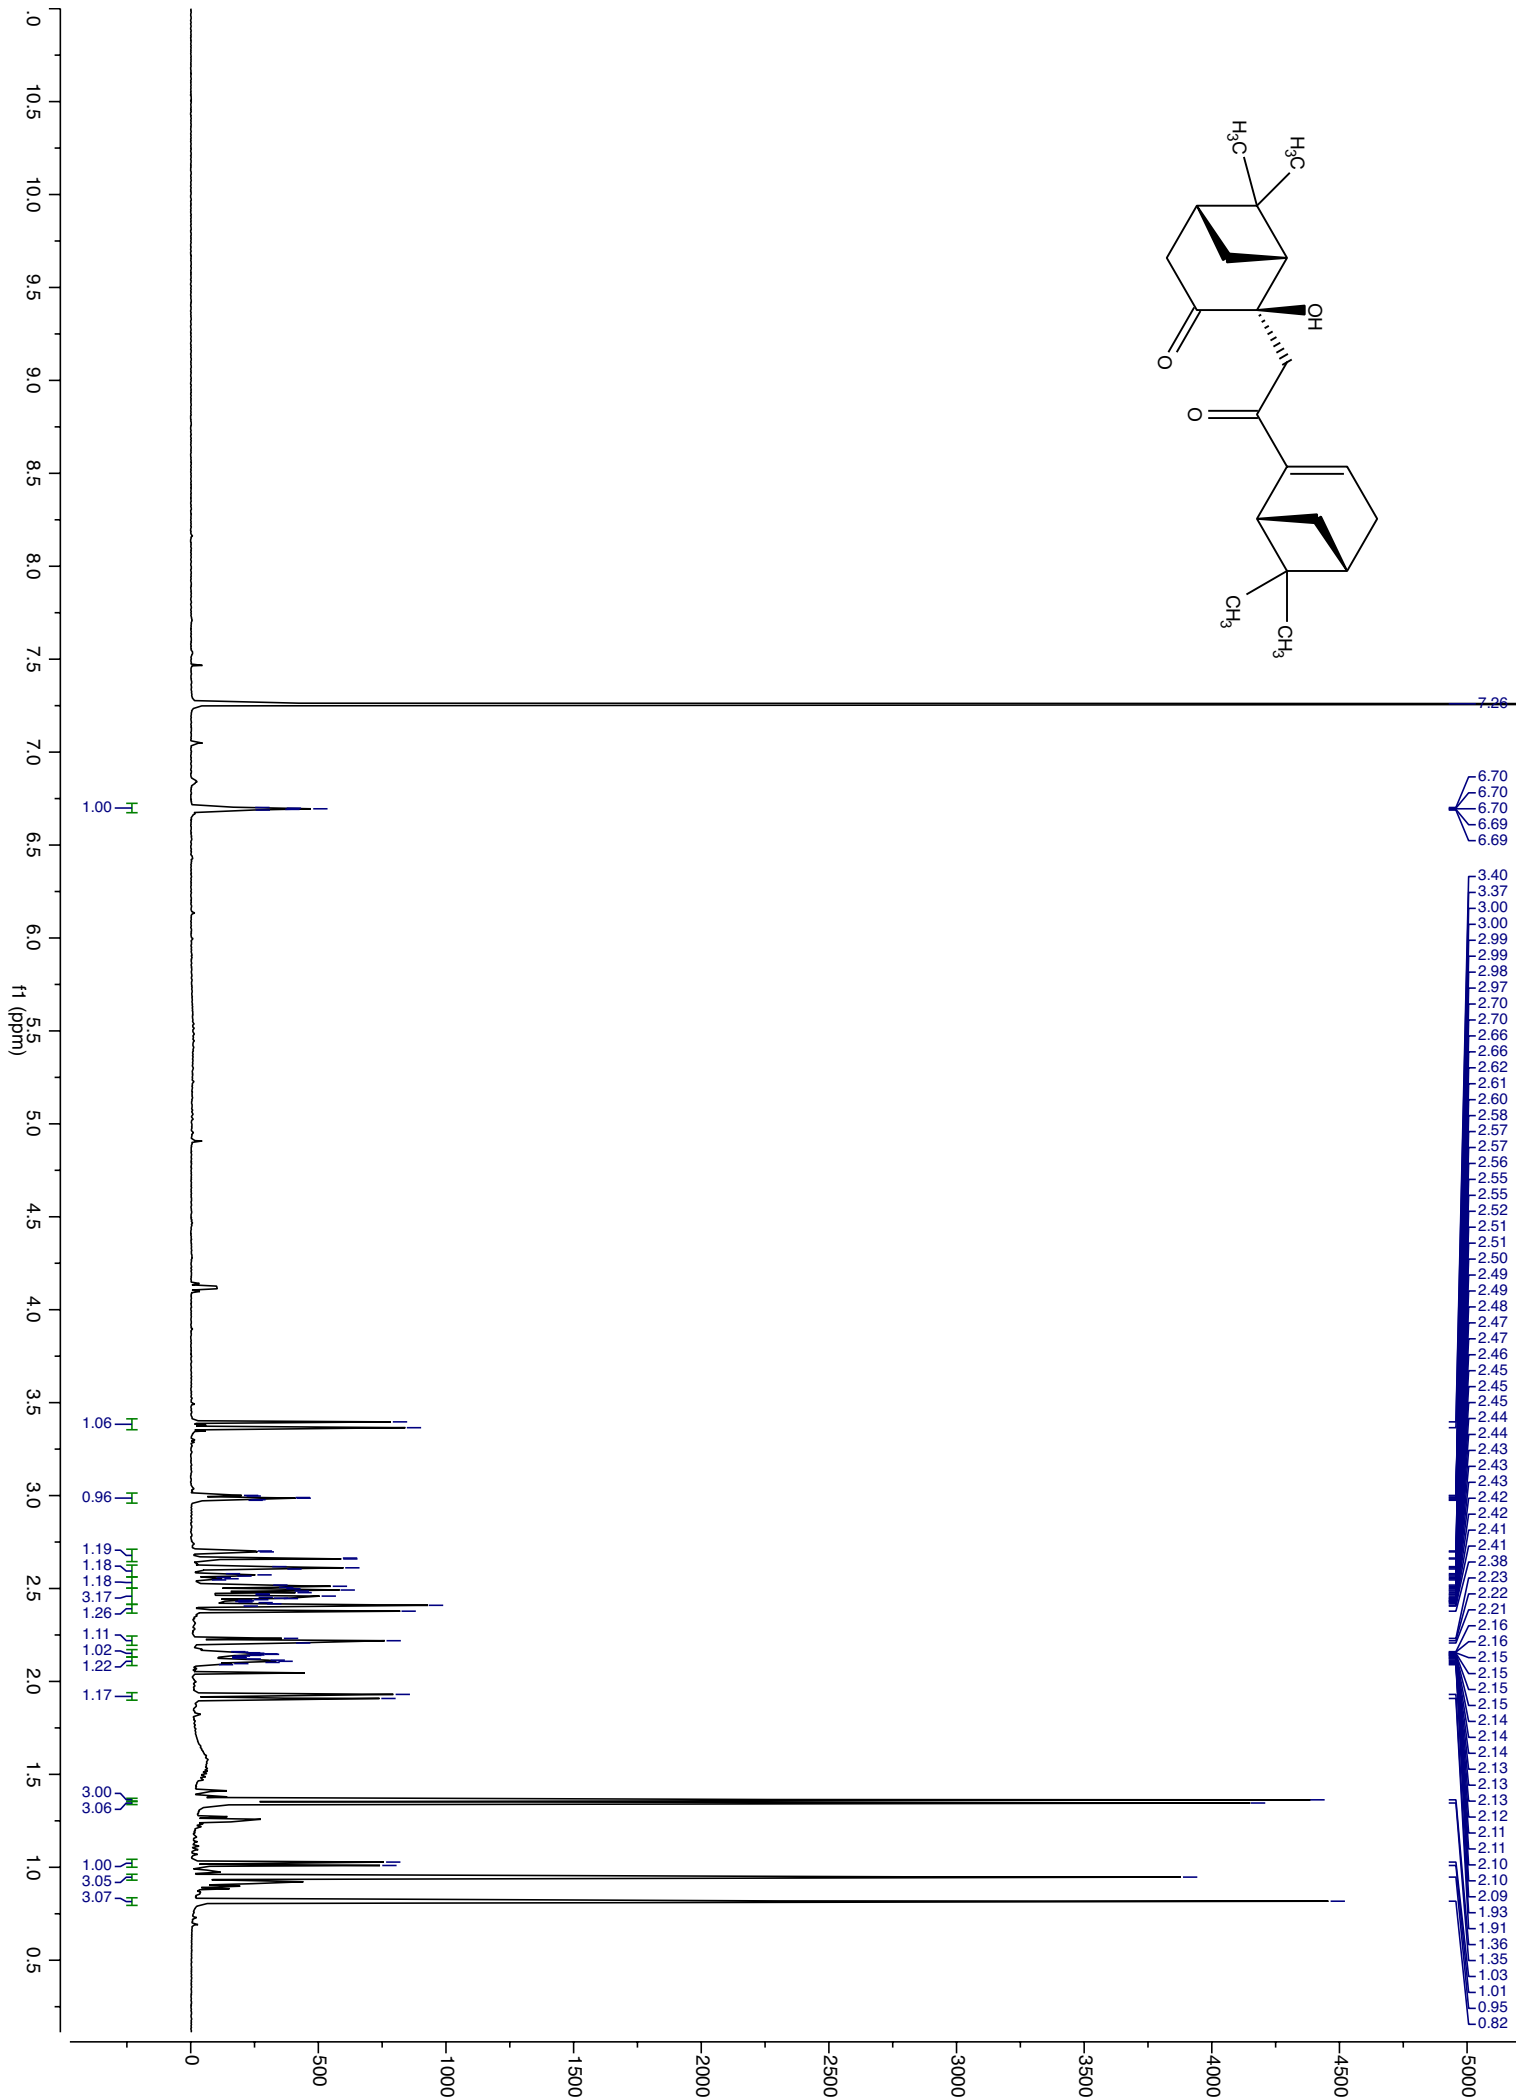

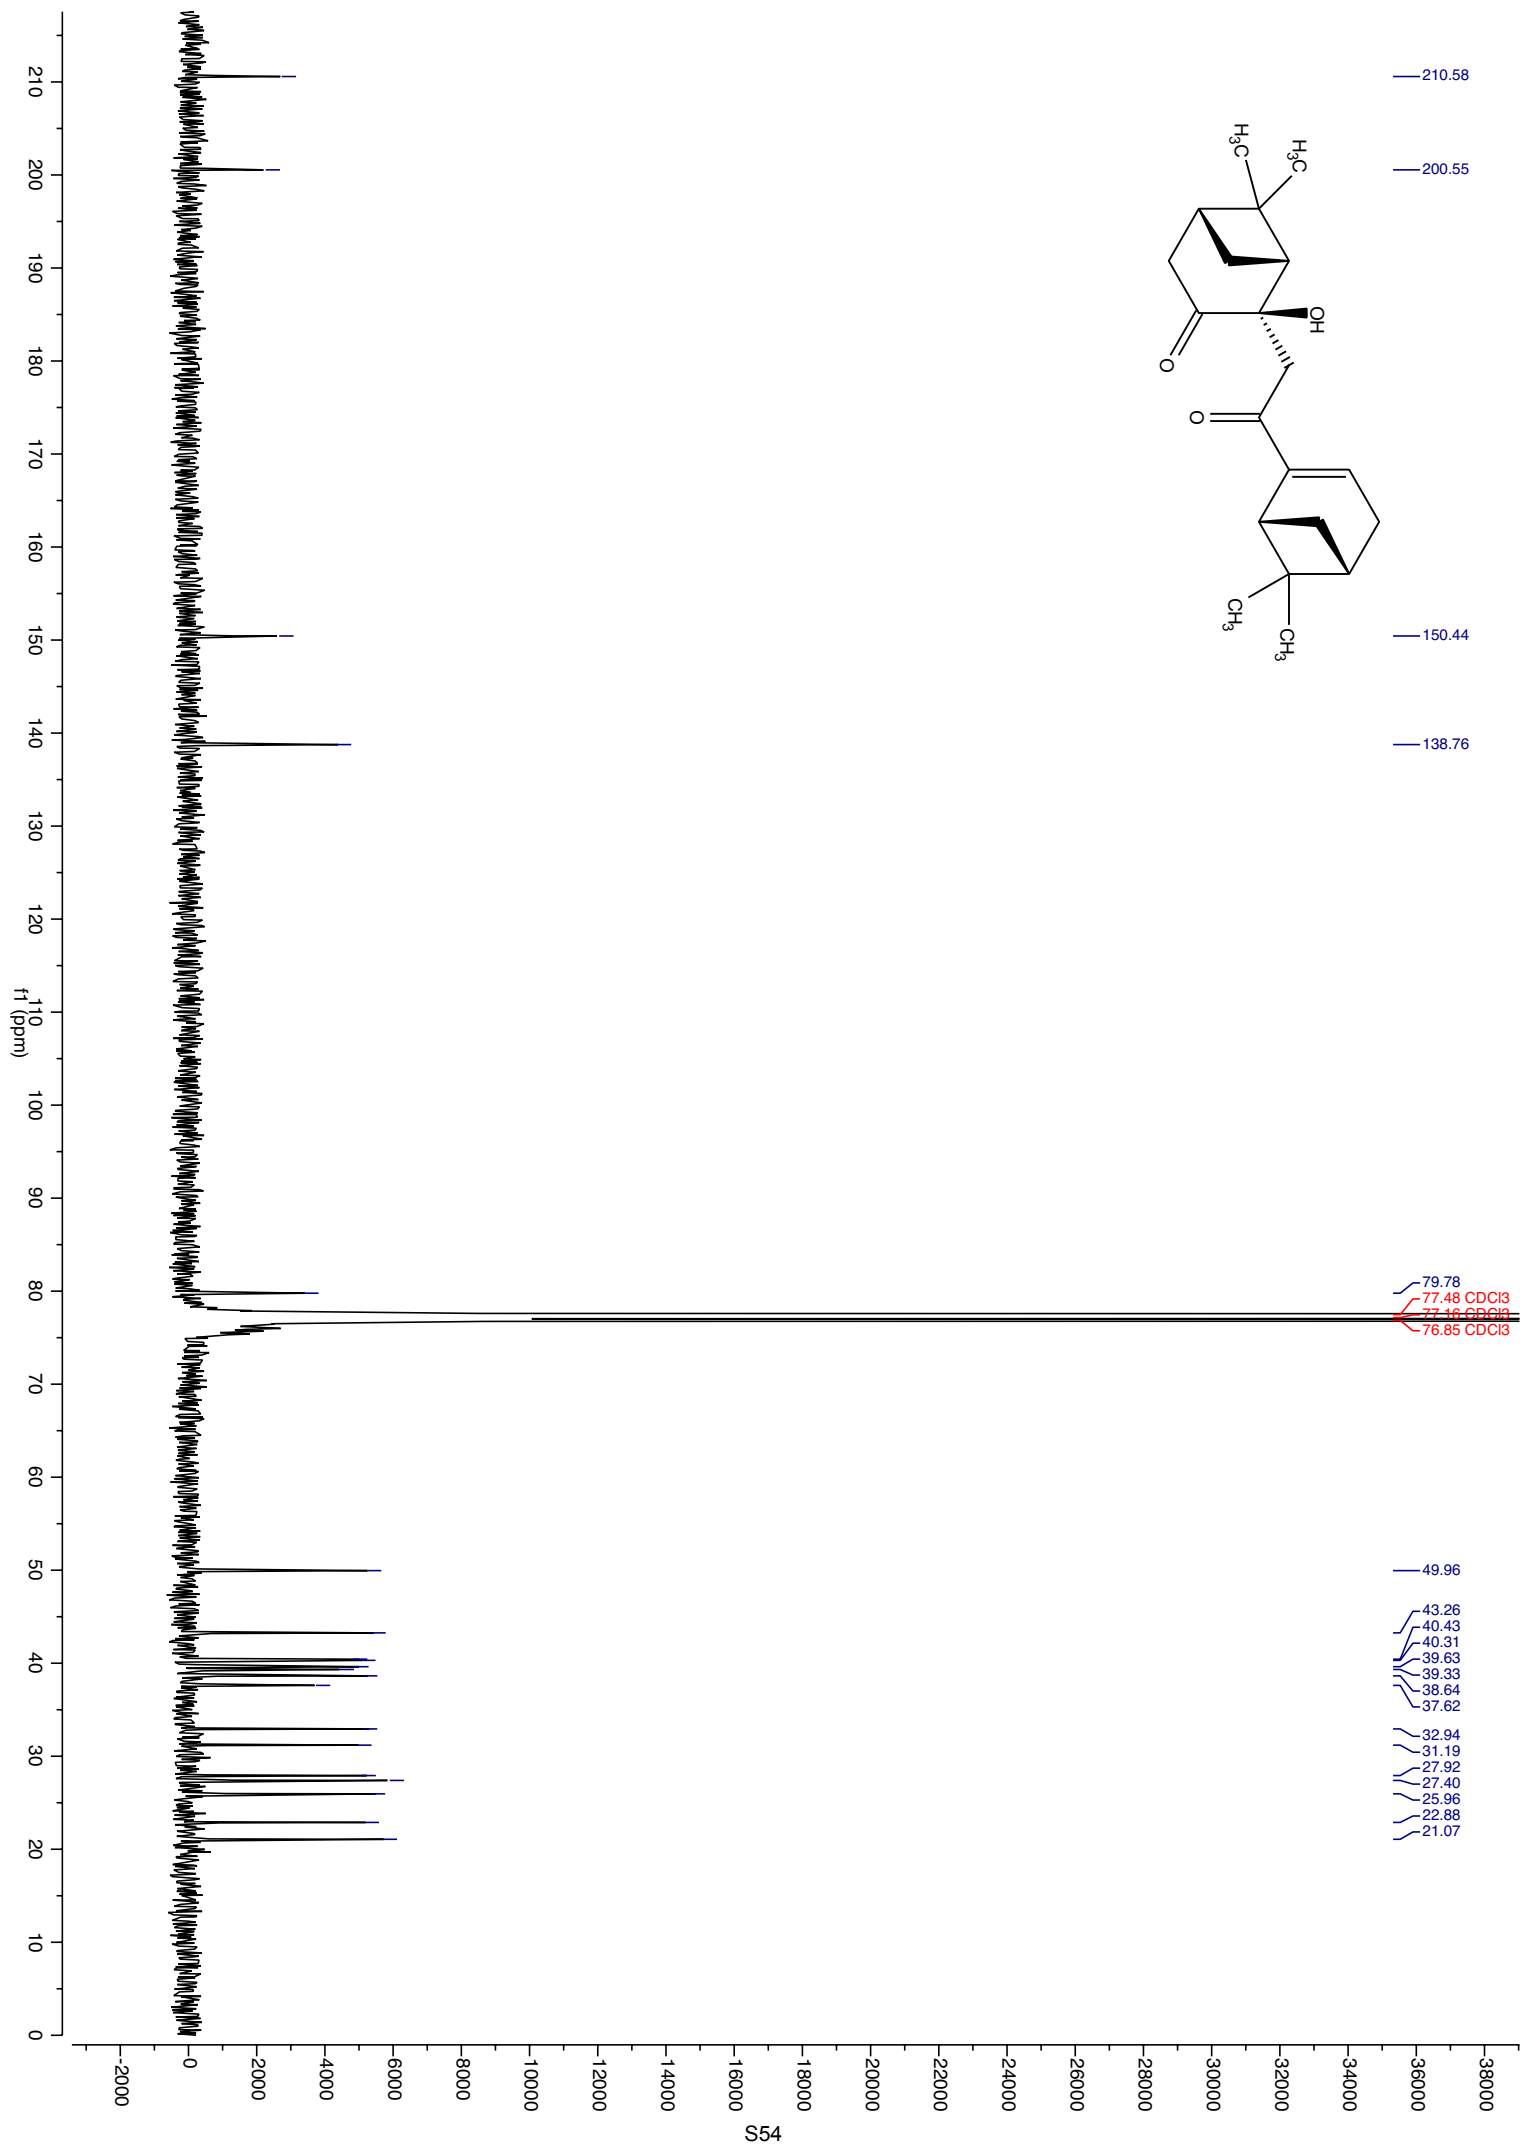

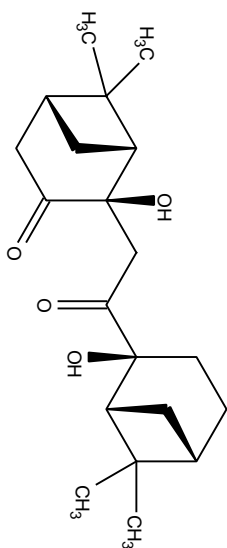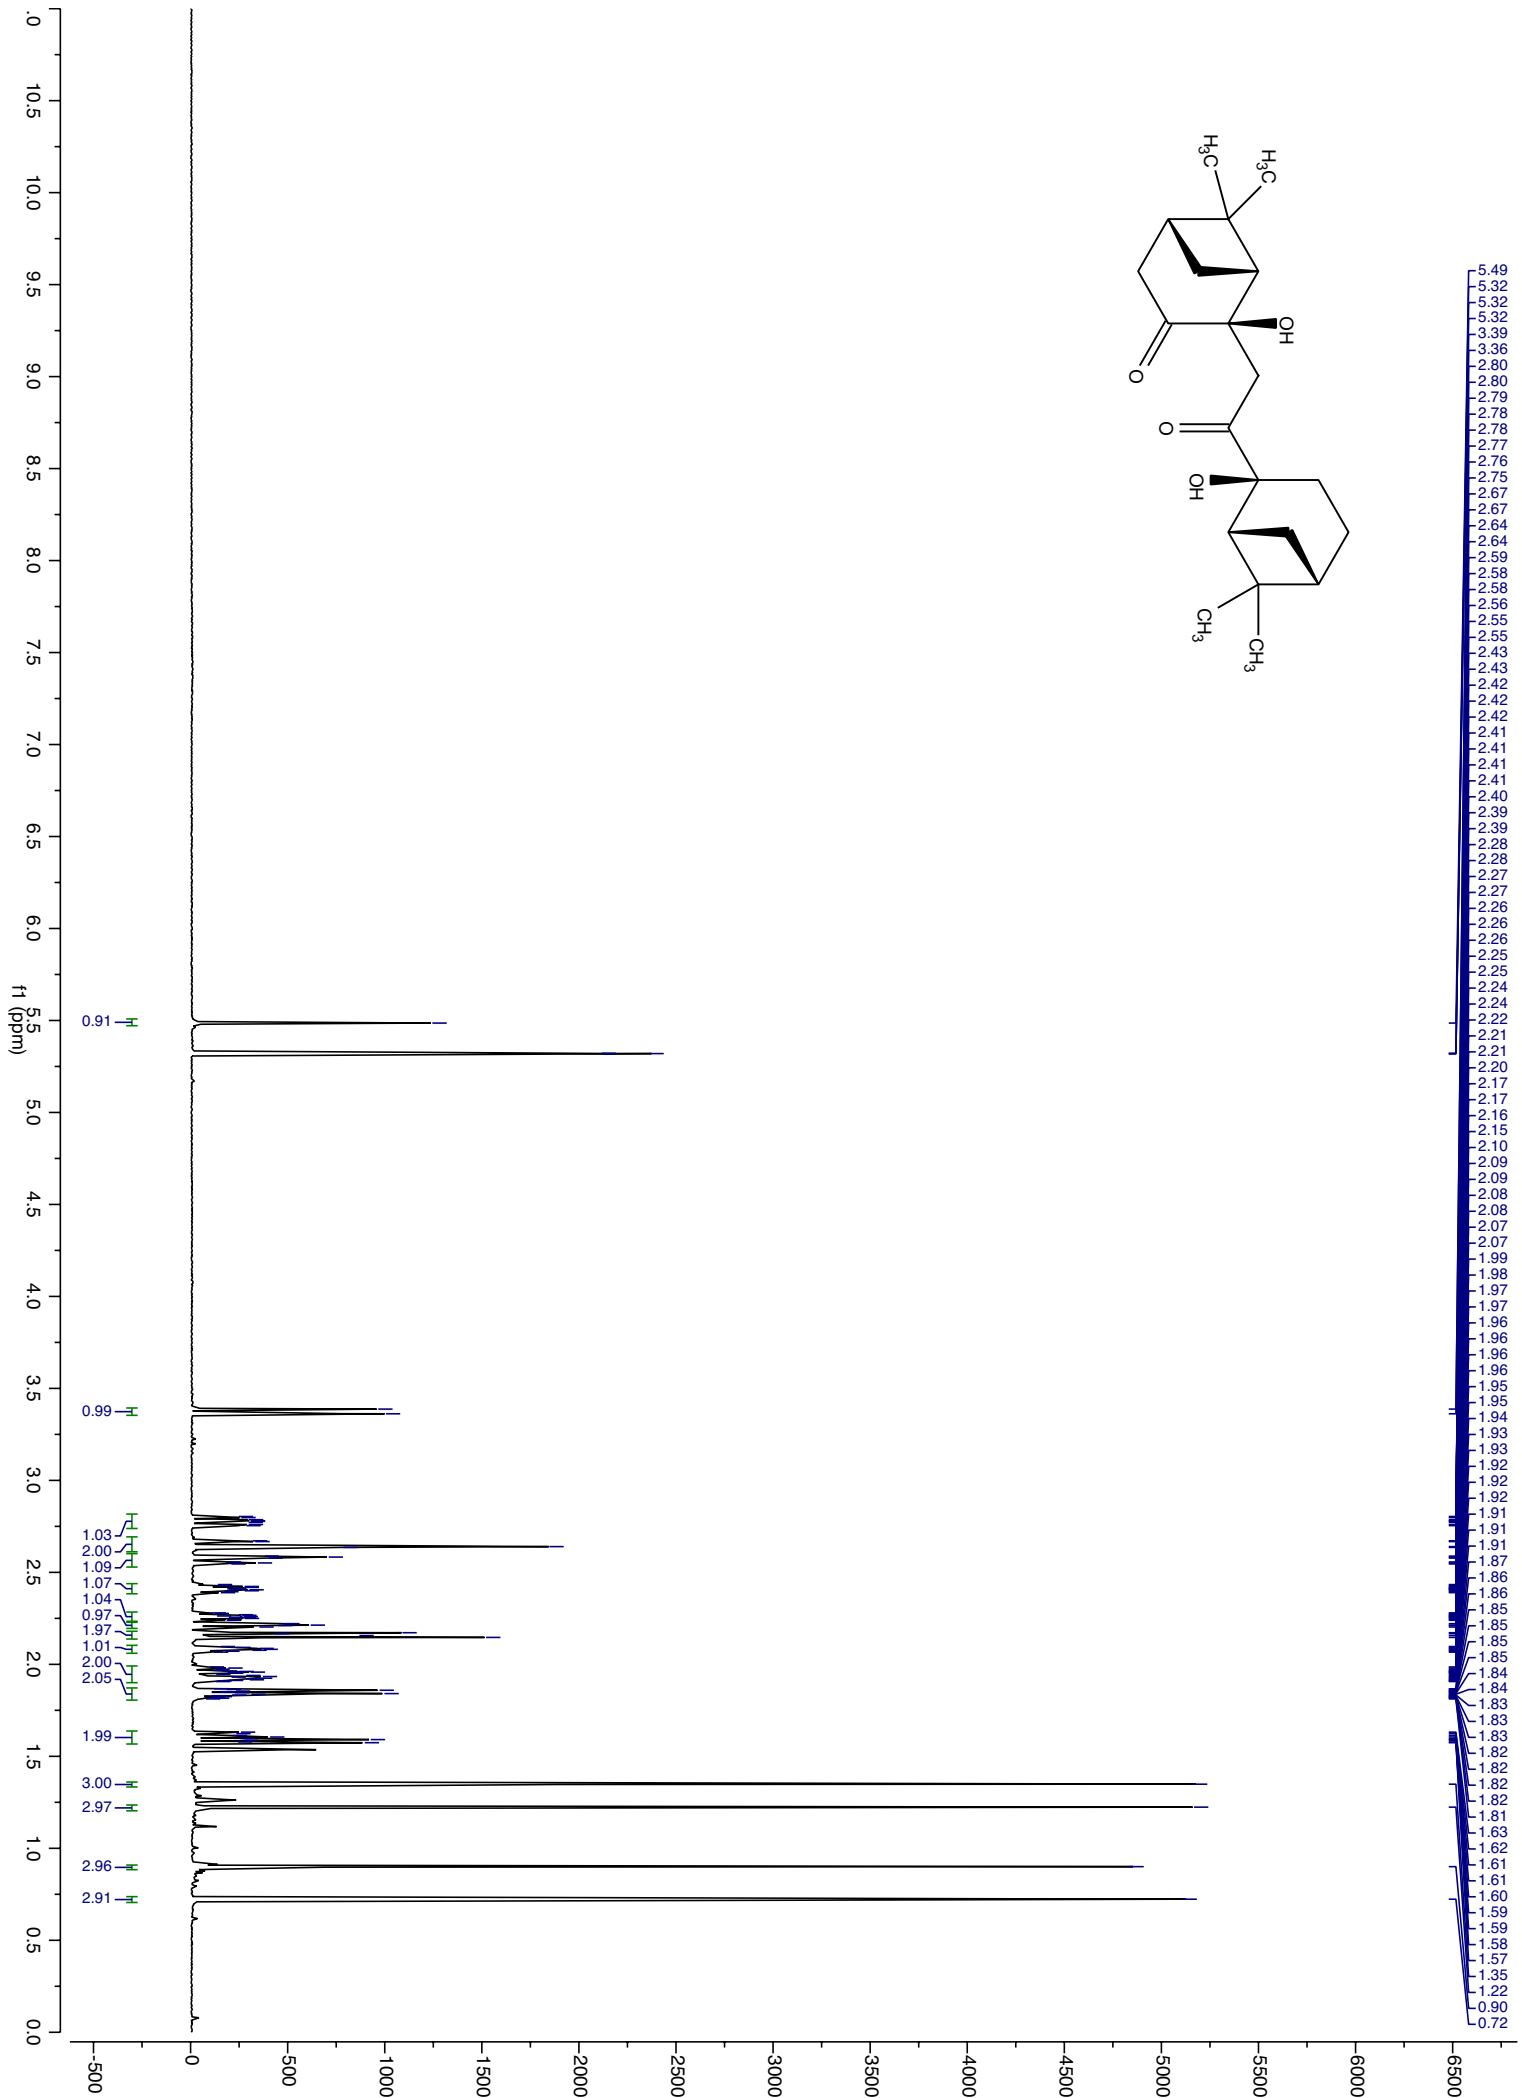

213.19  
213.12

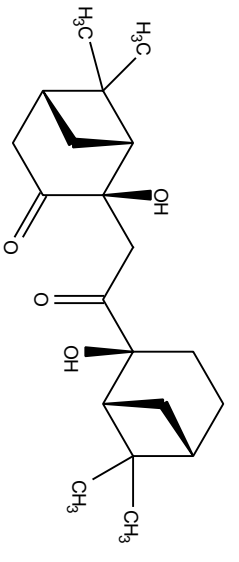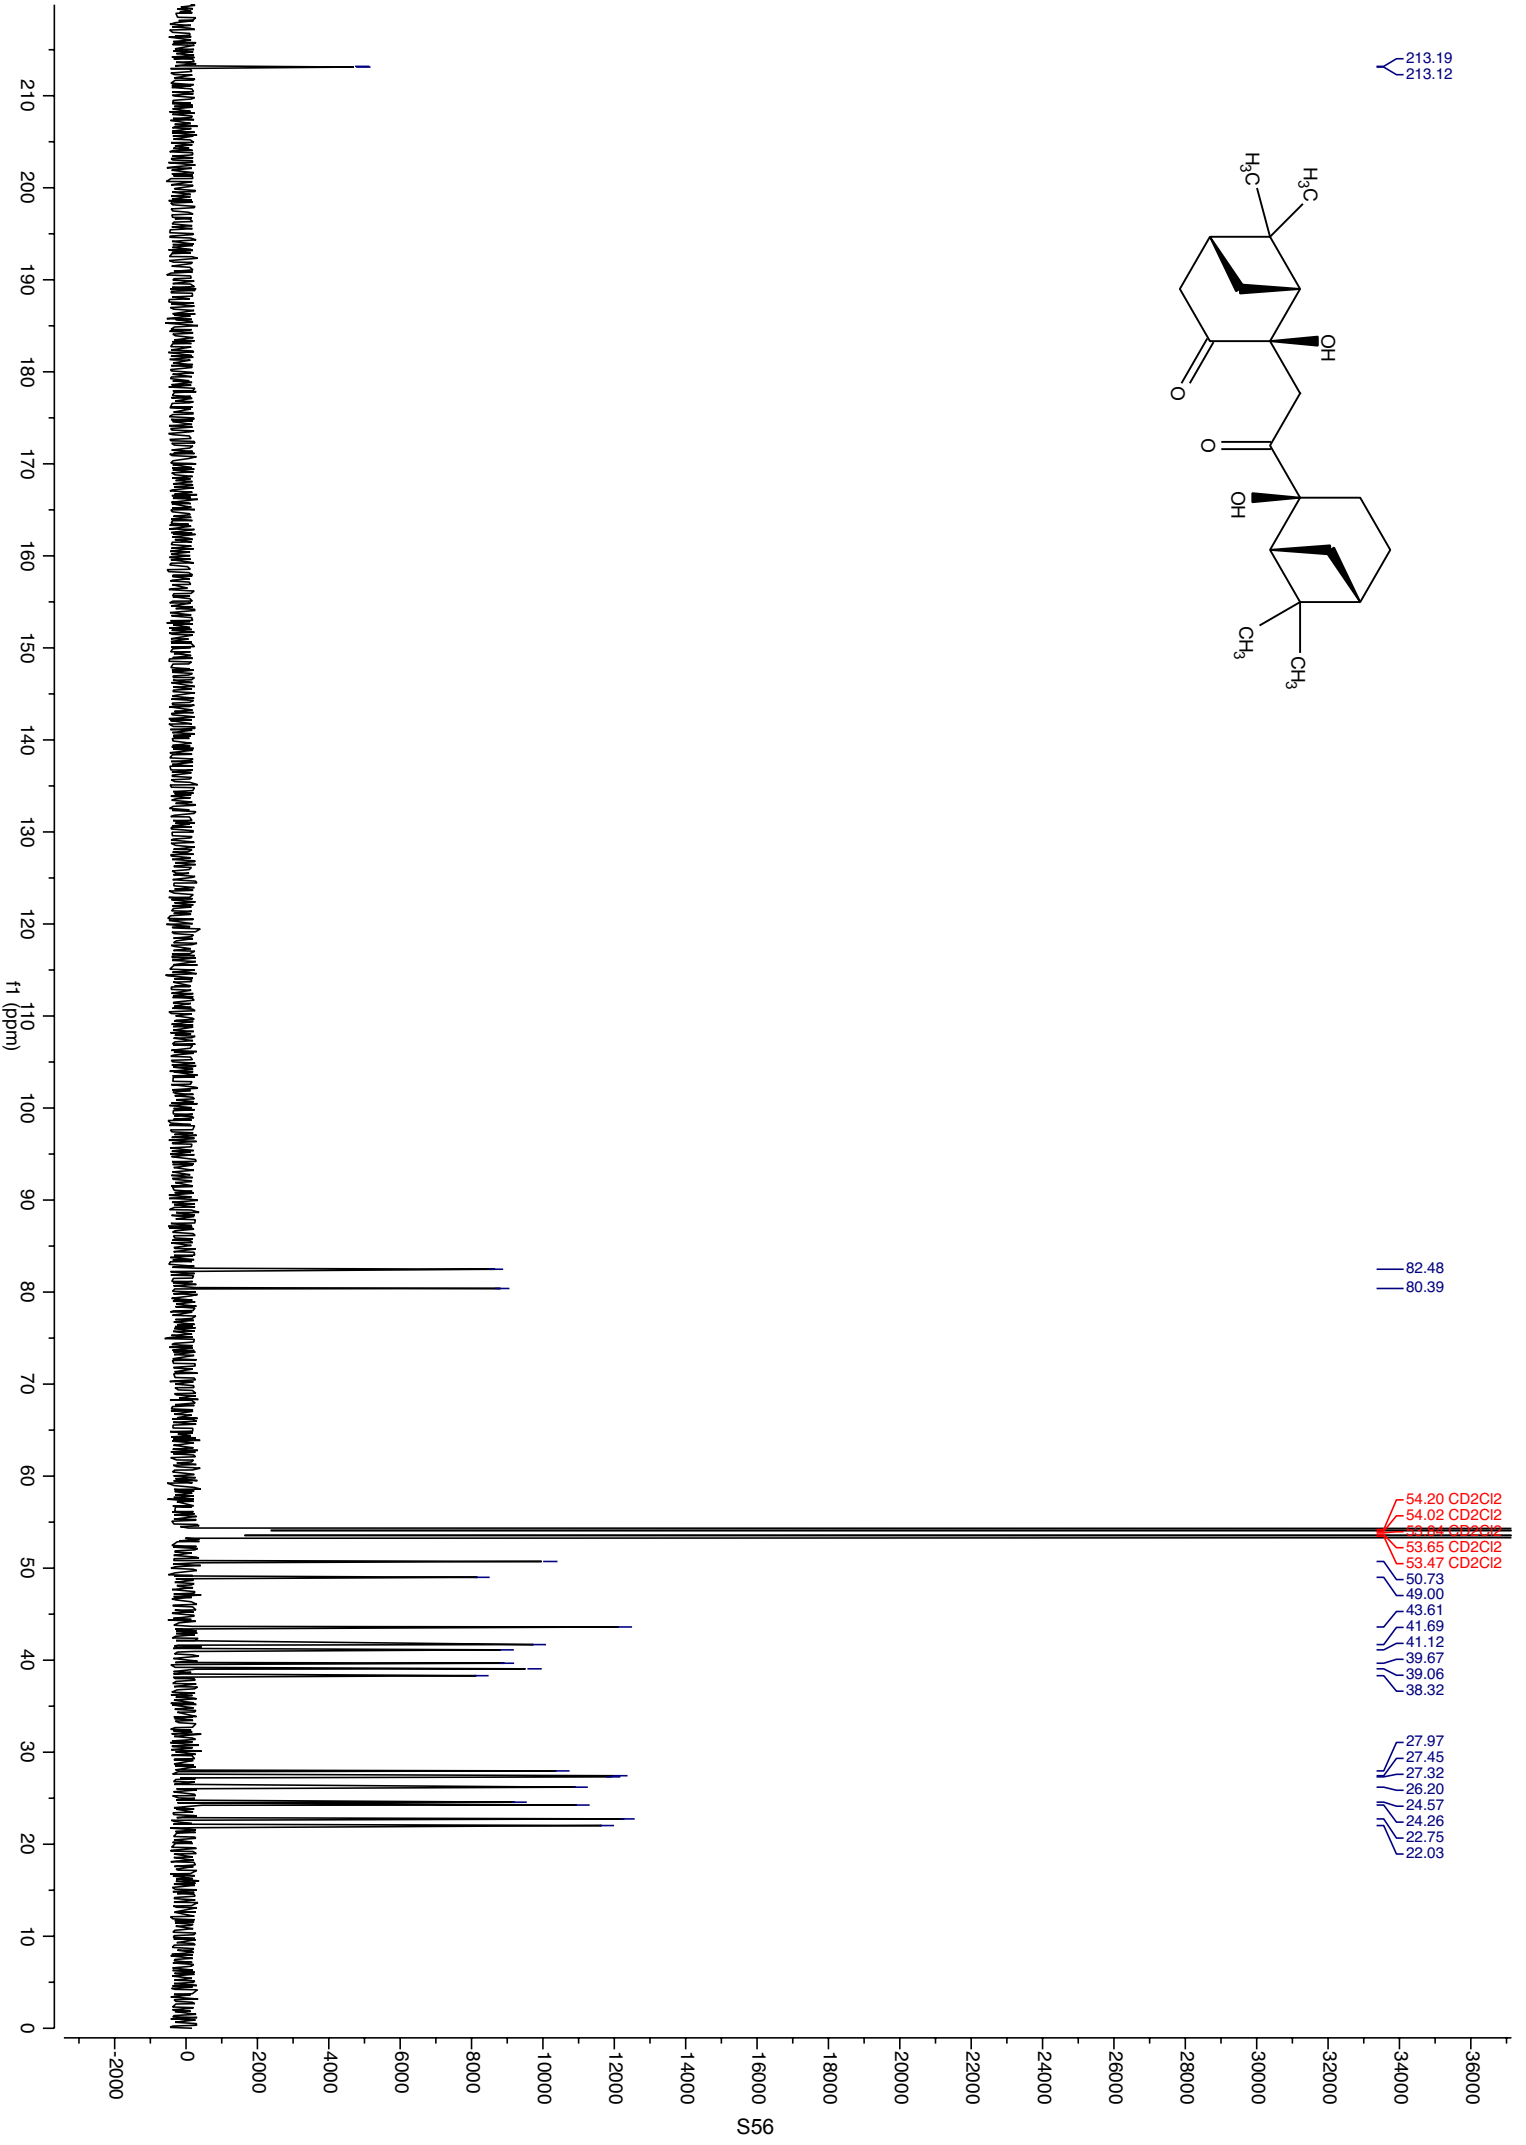



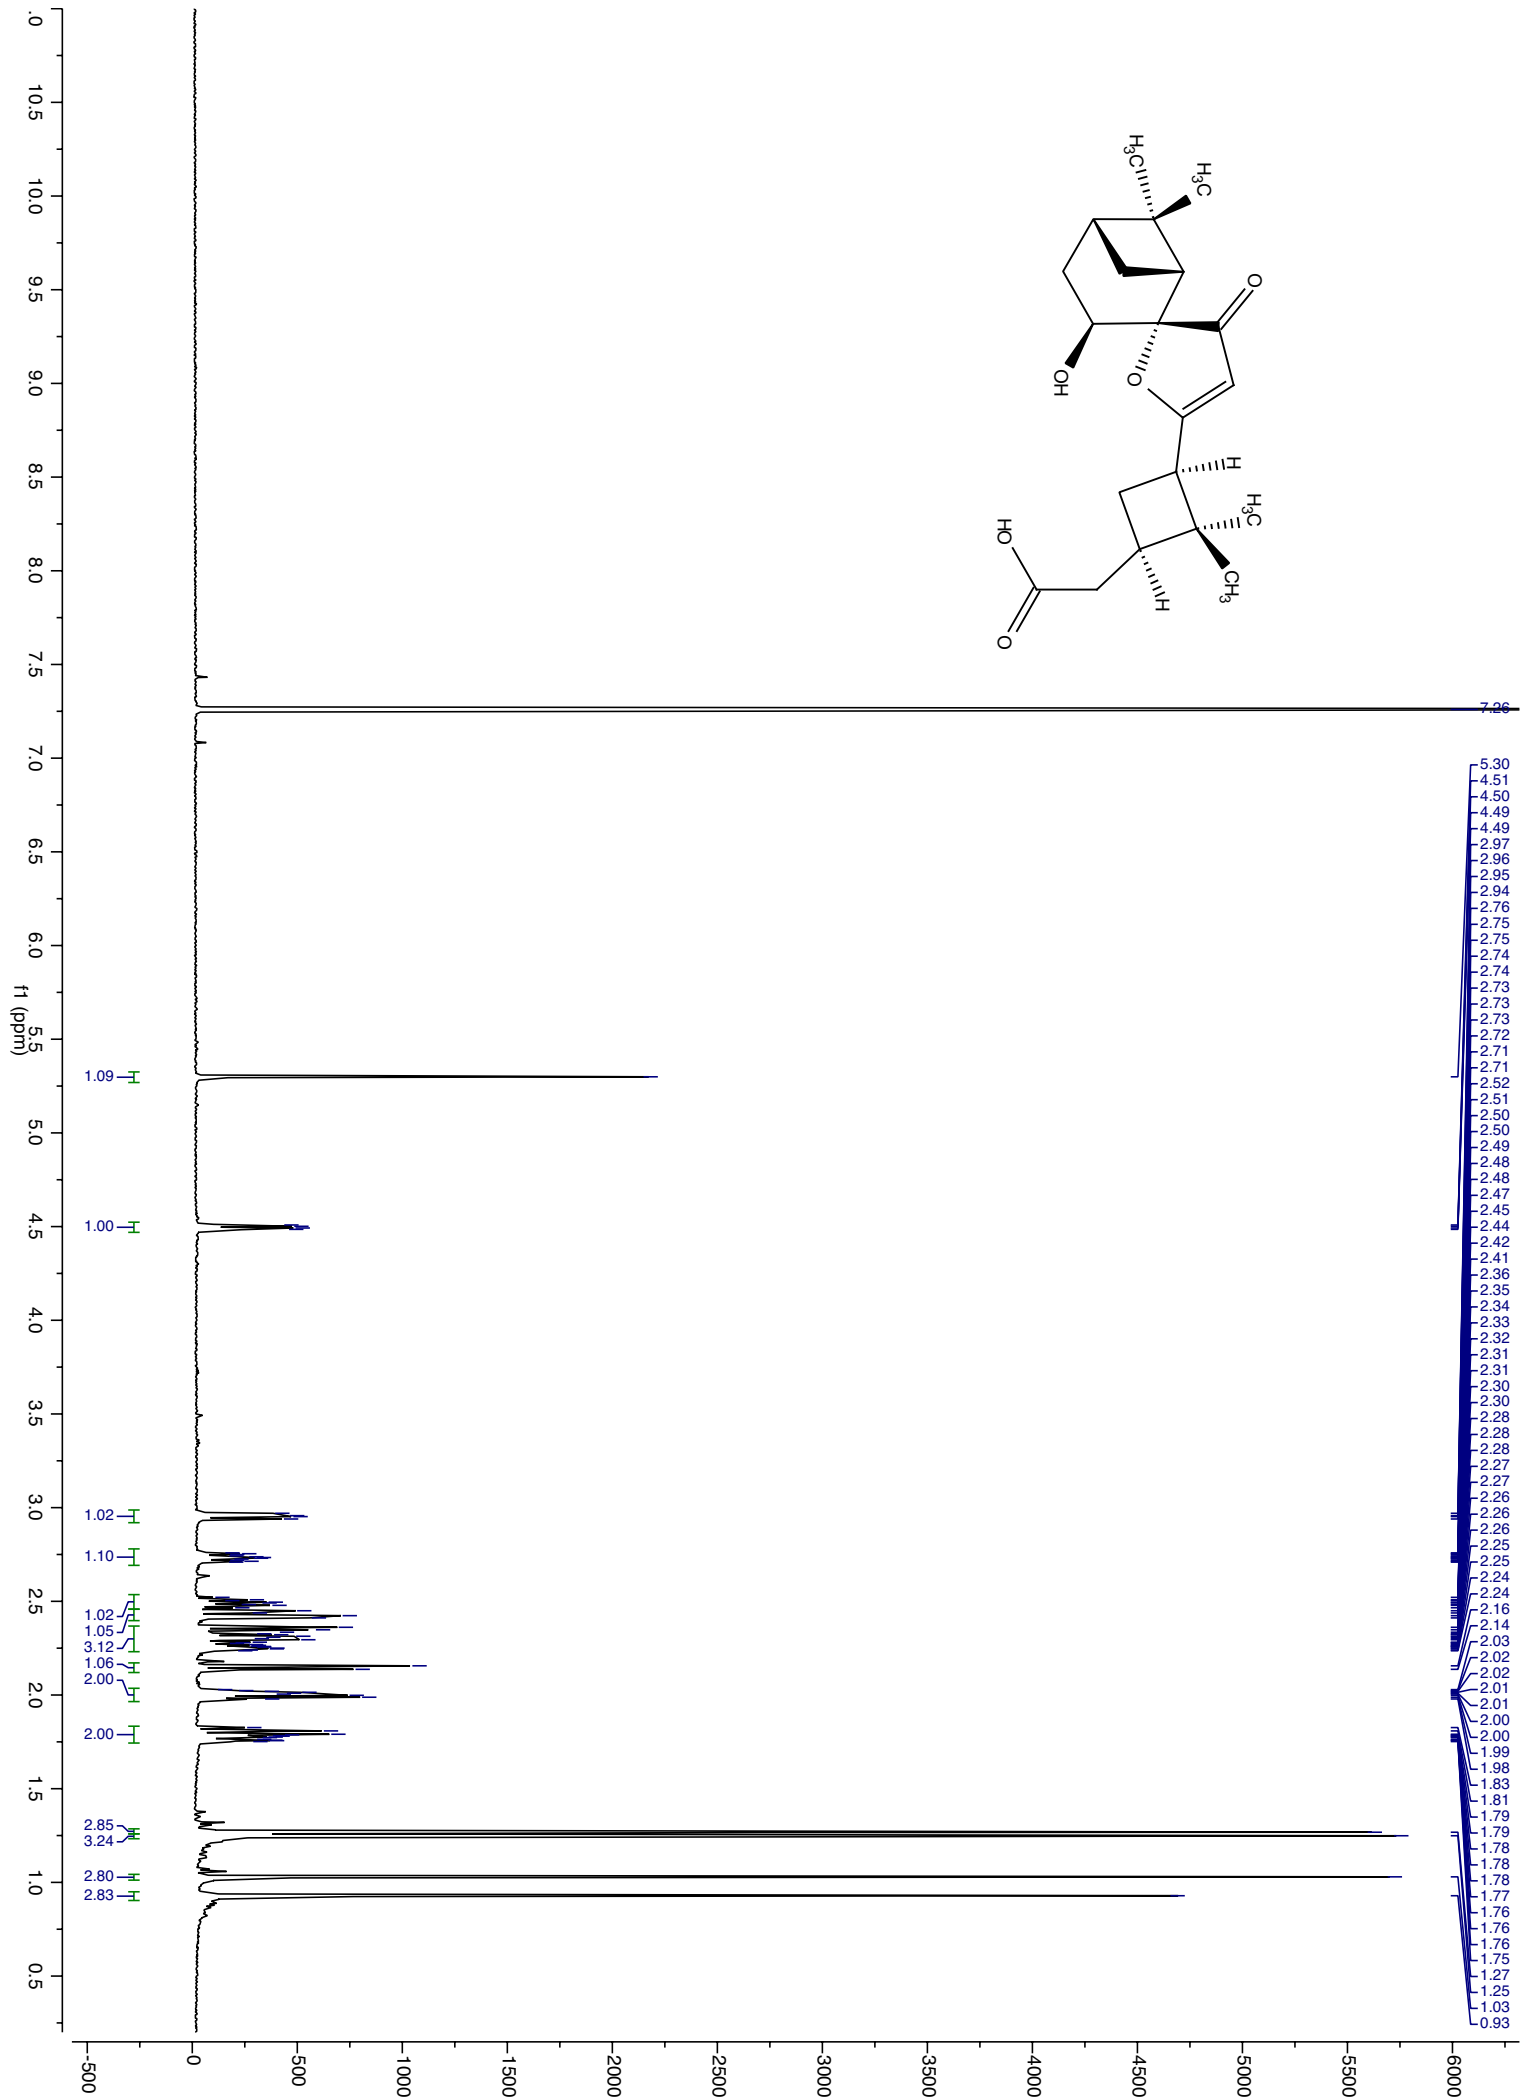

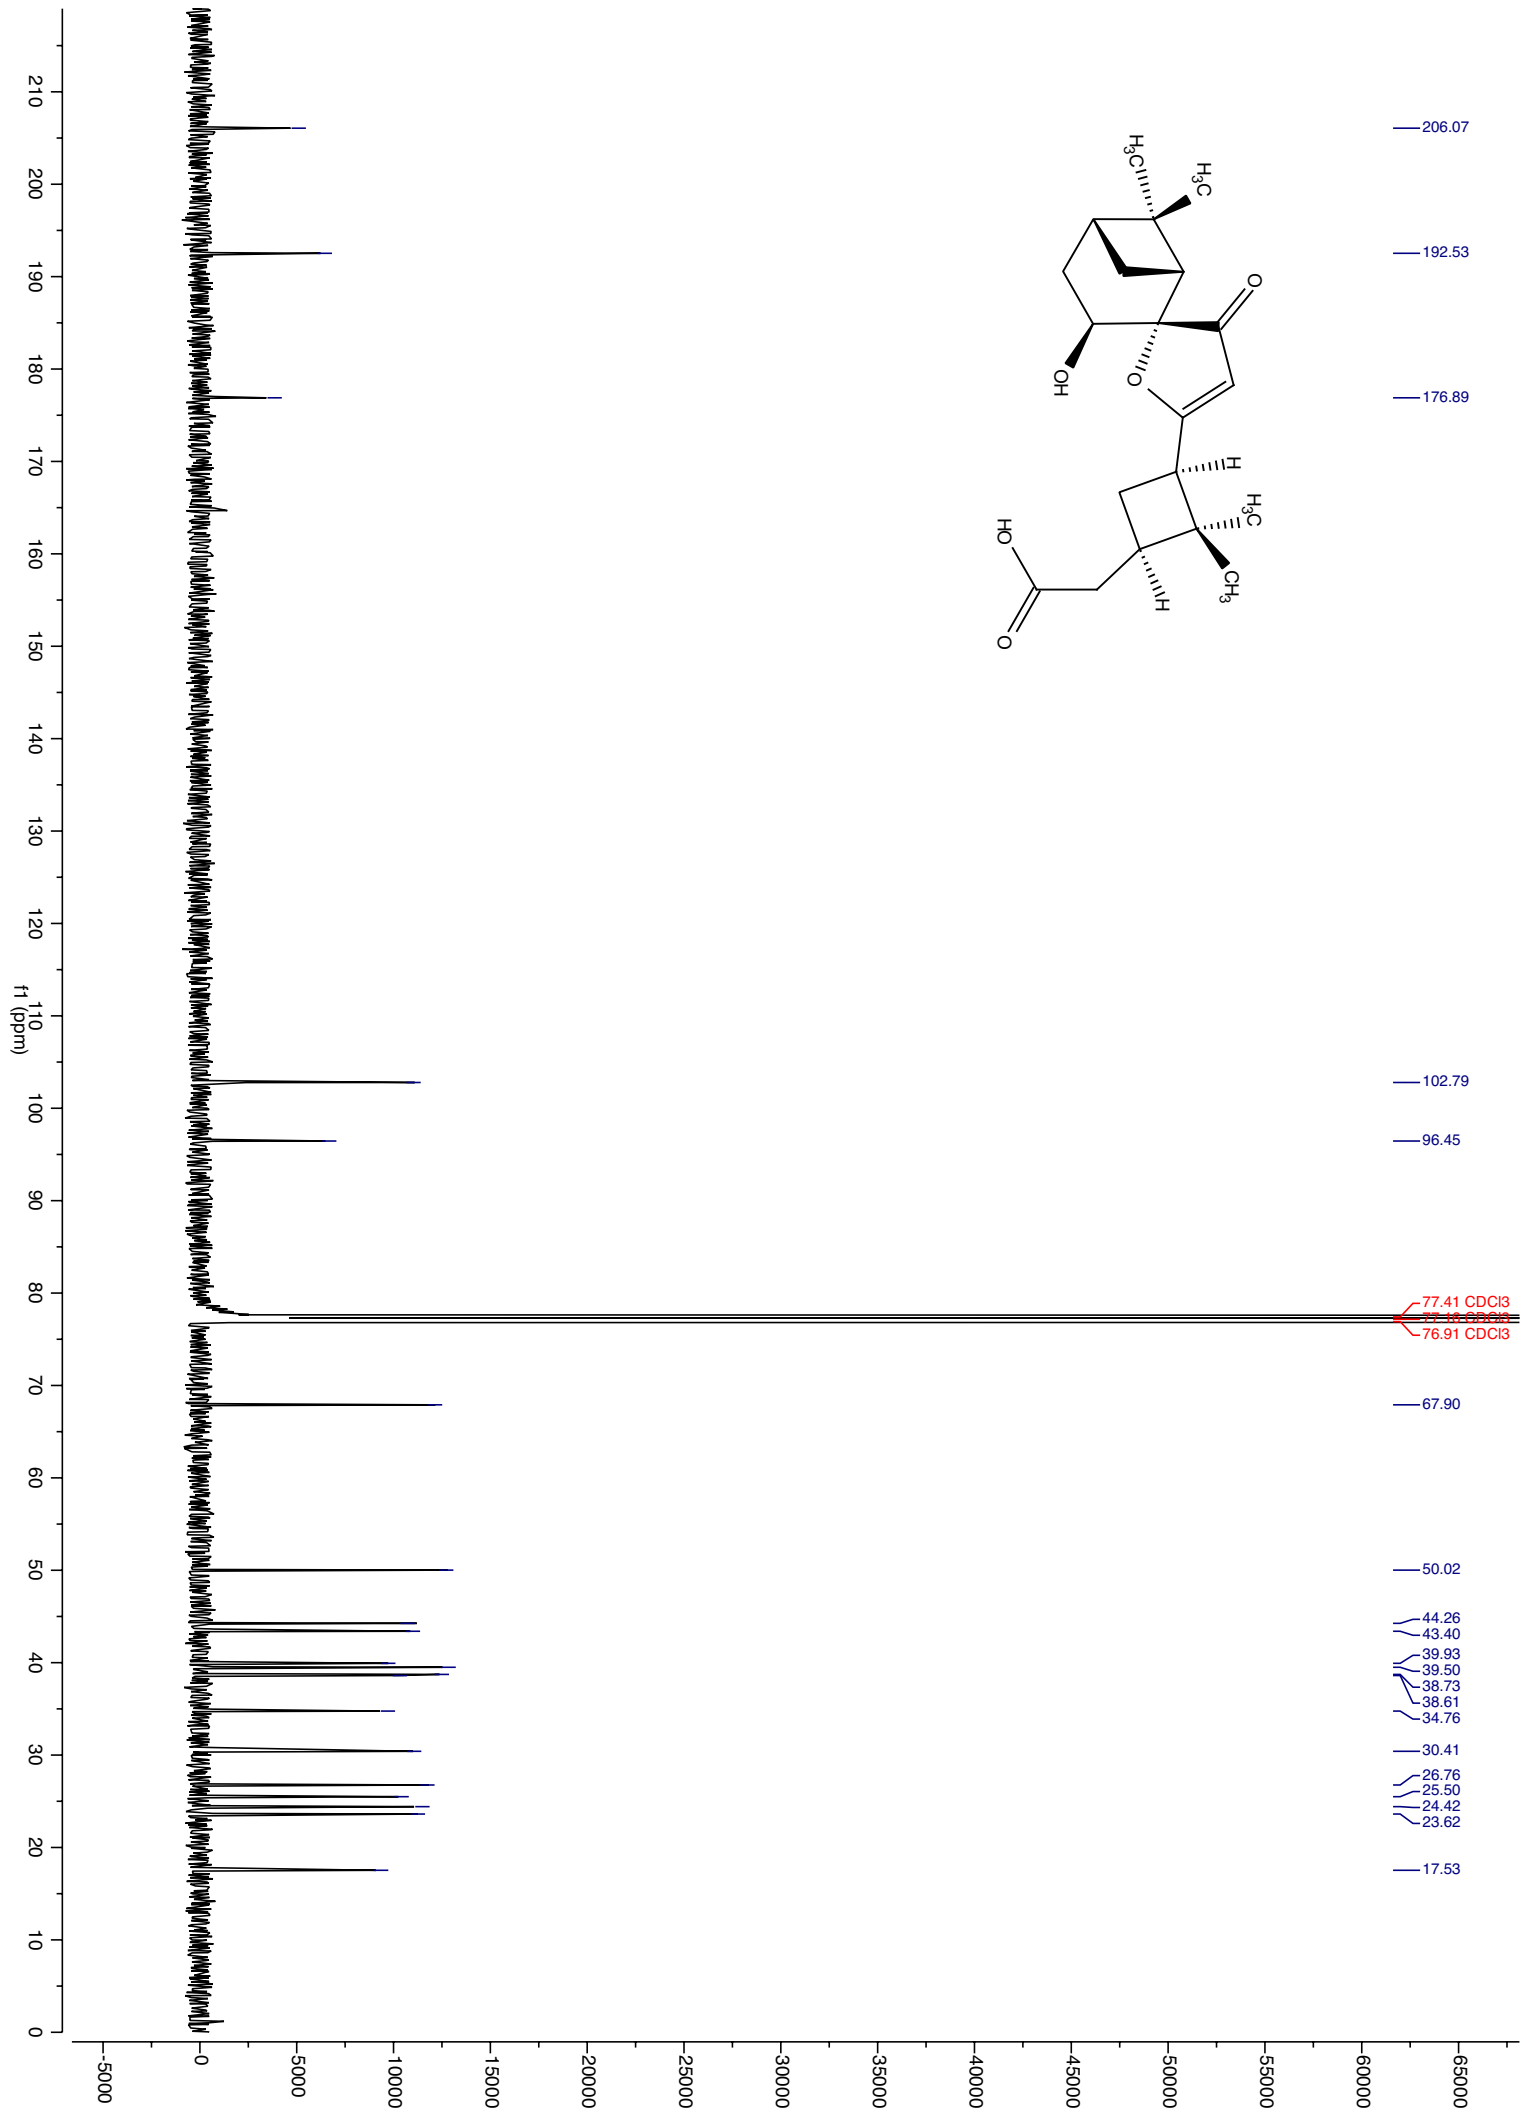

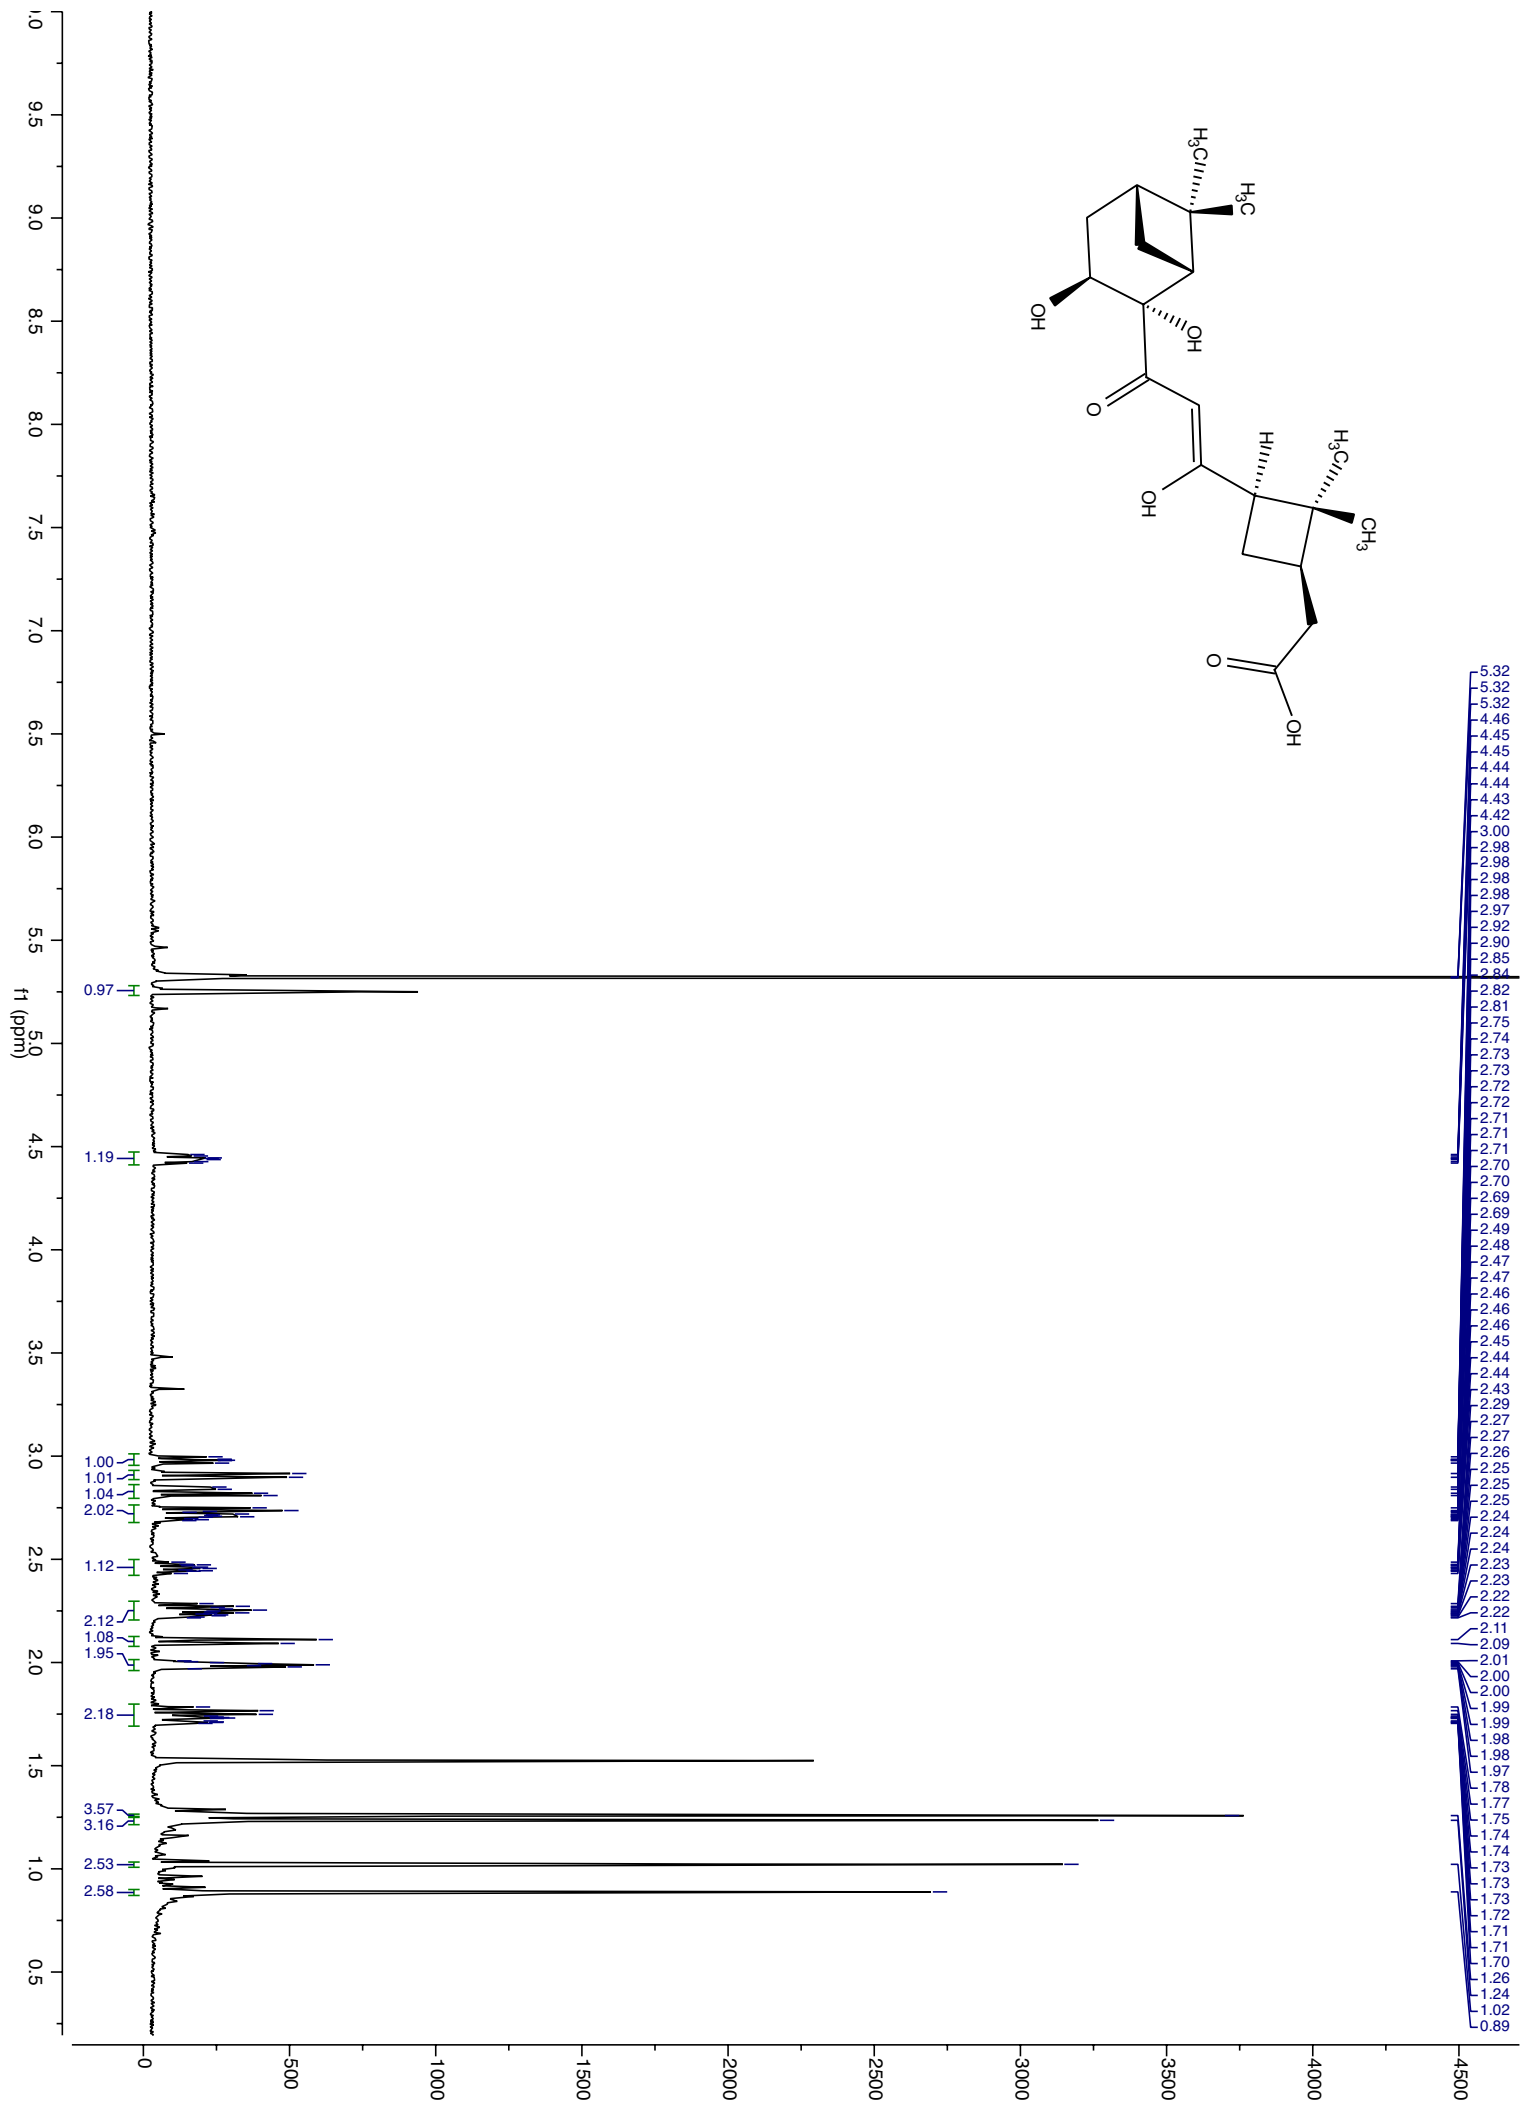

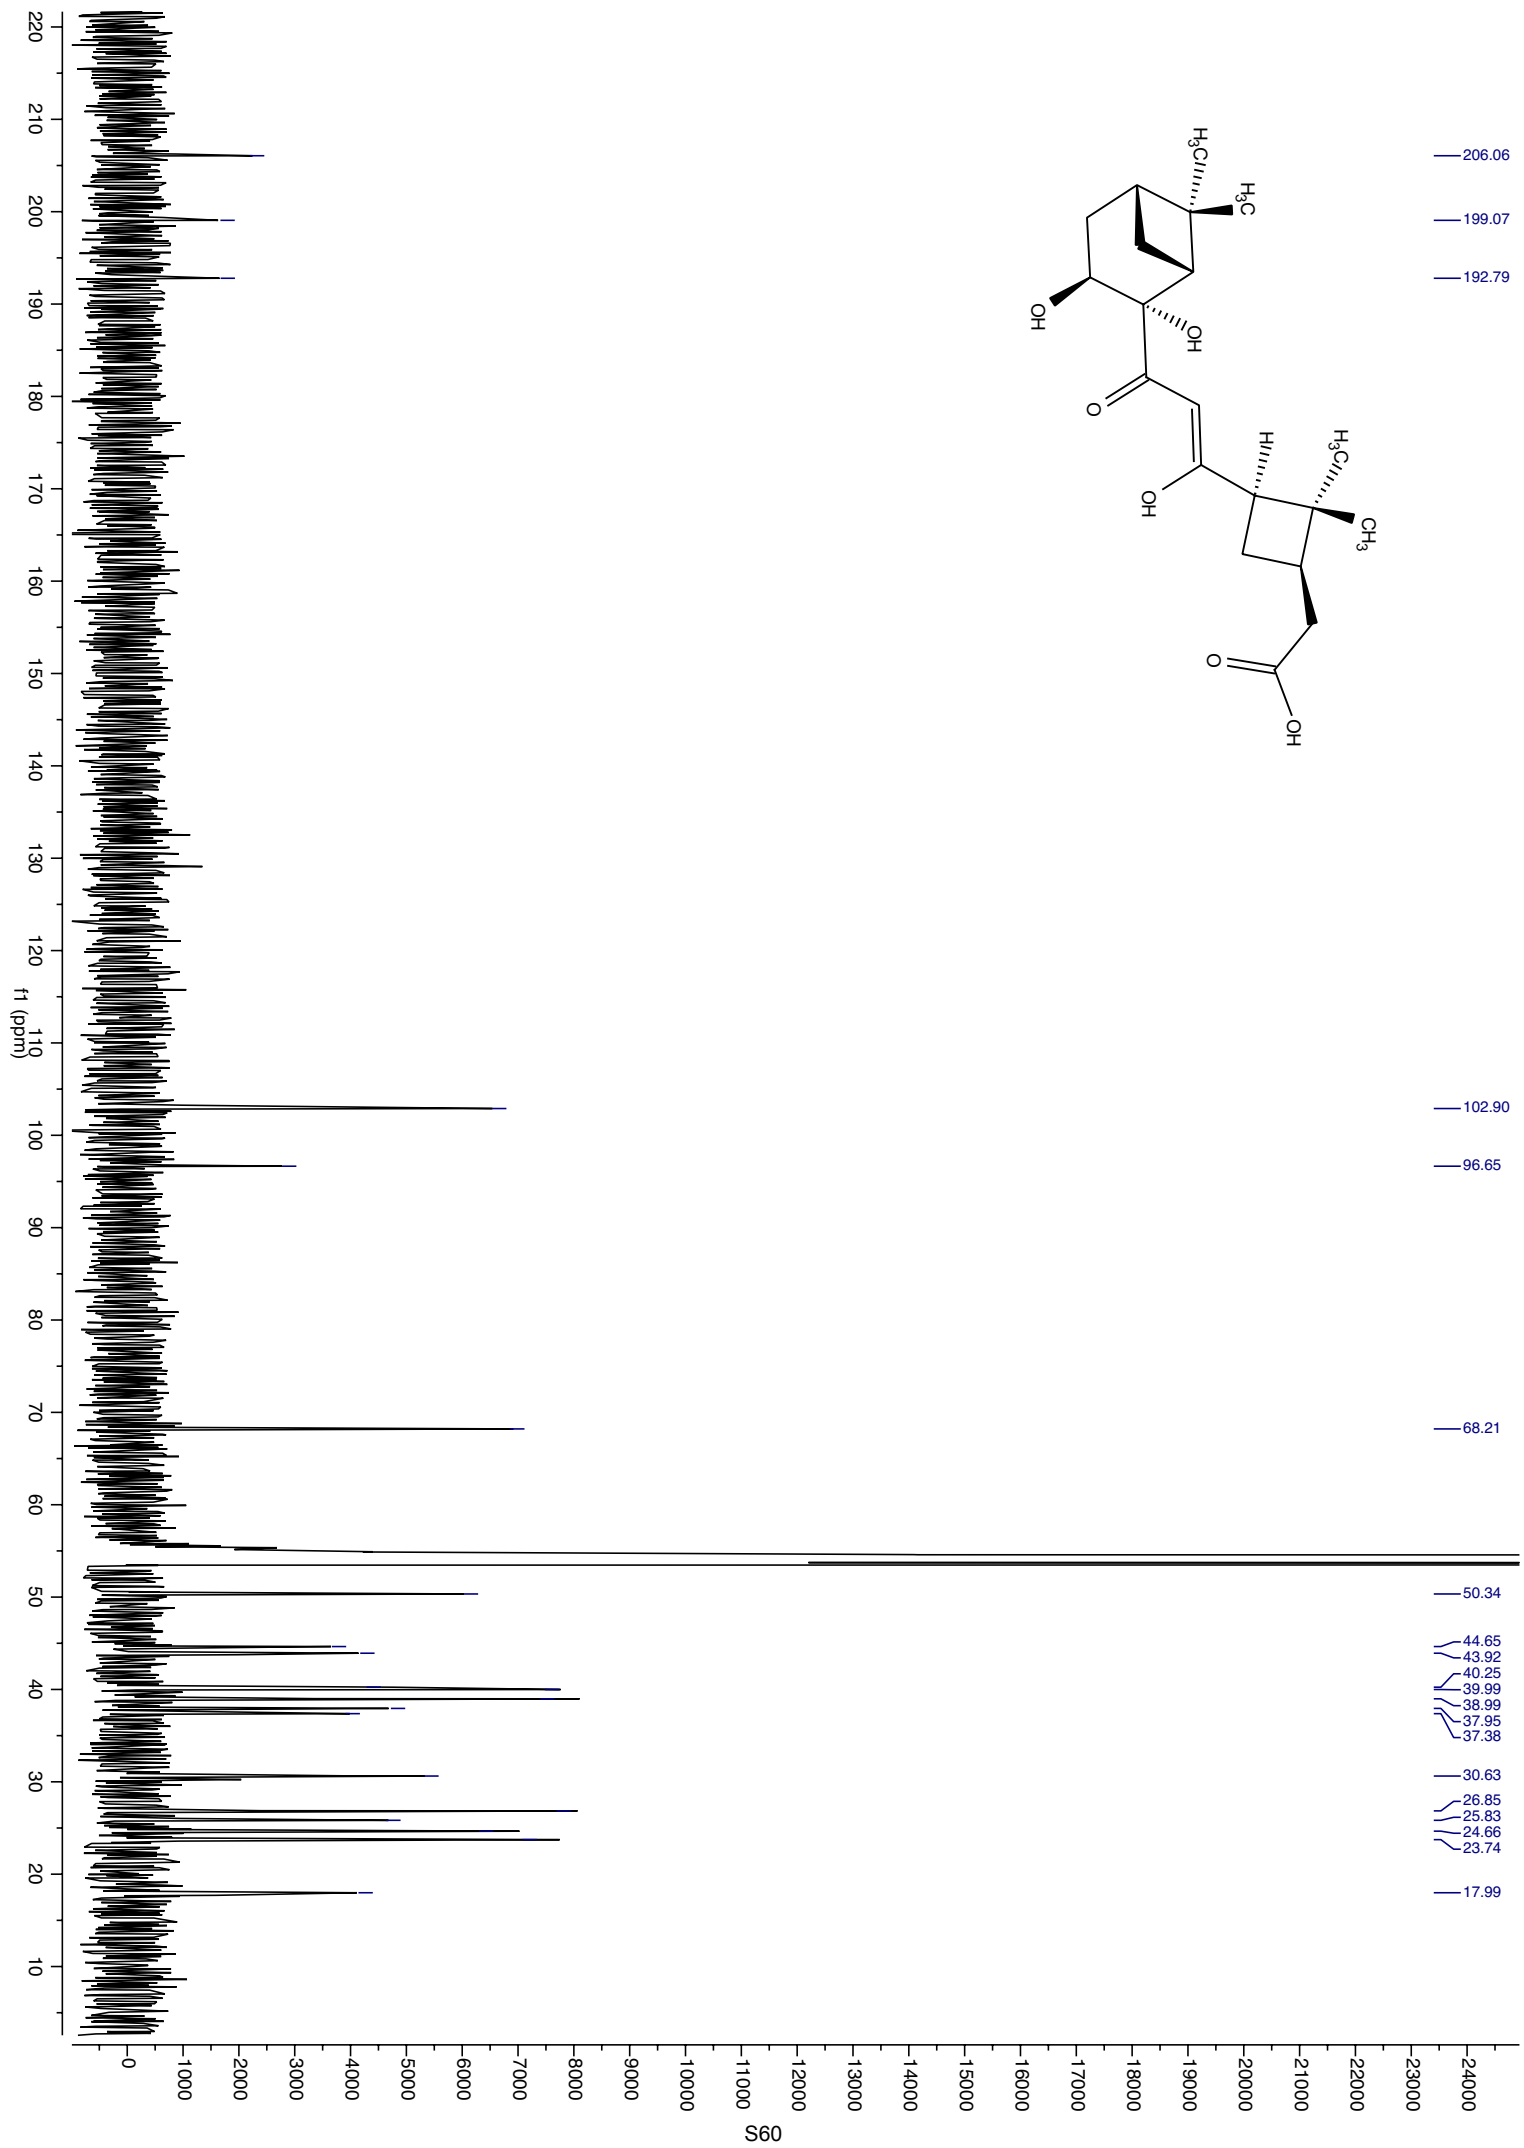

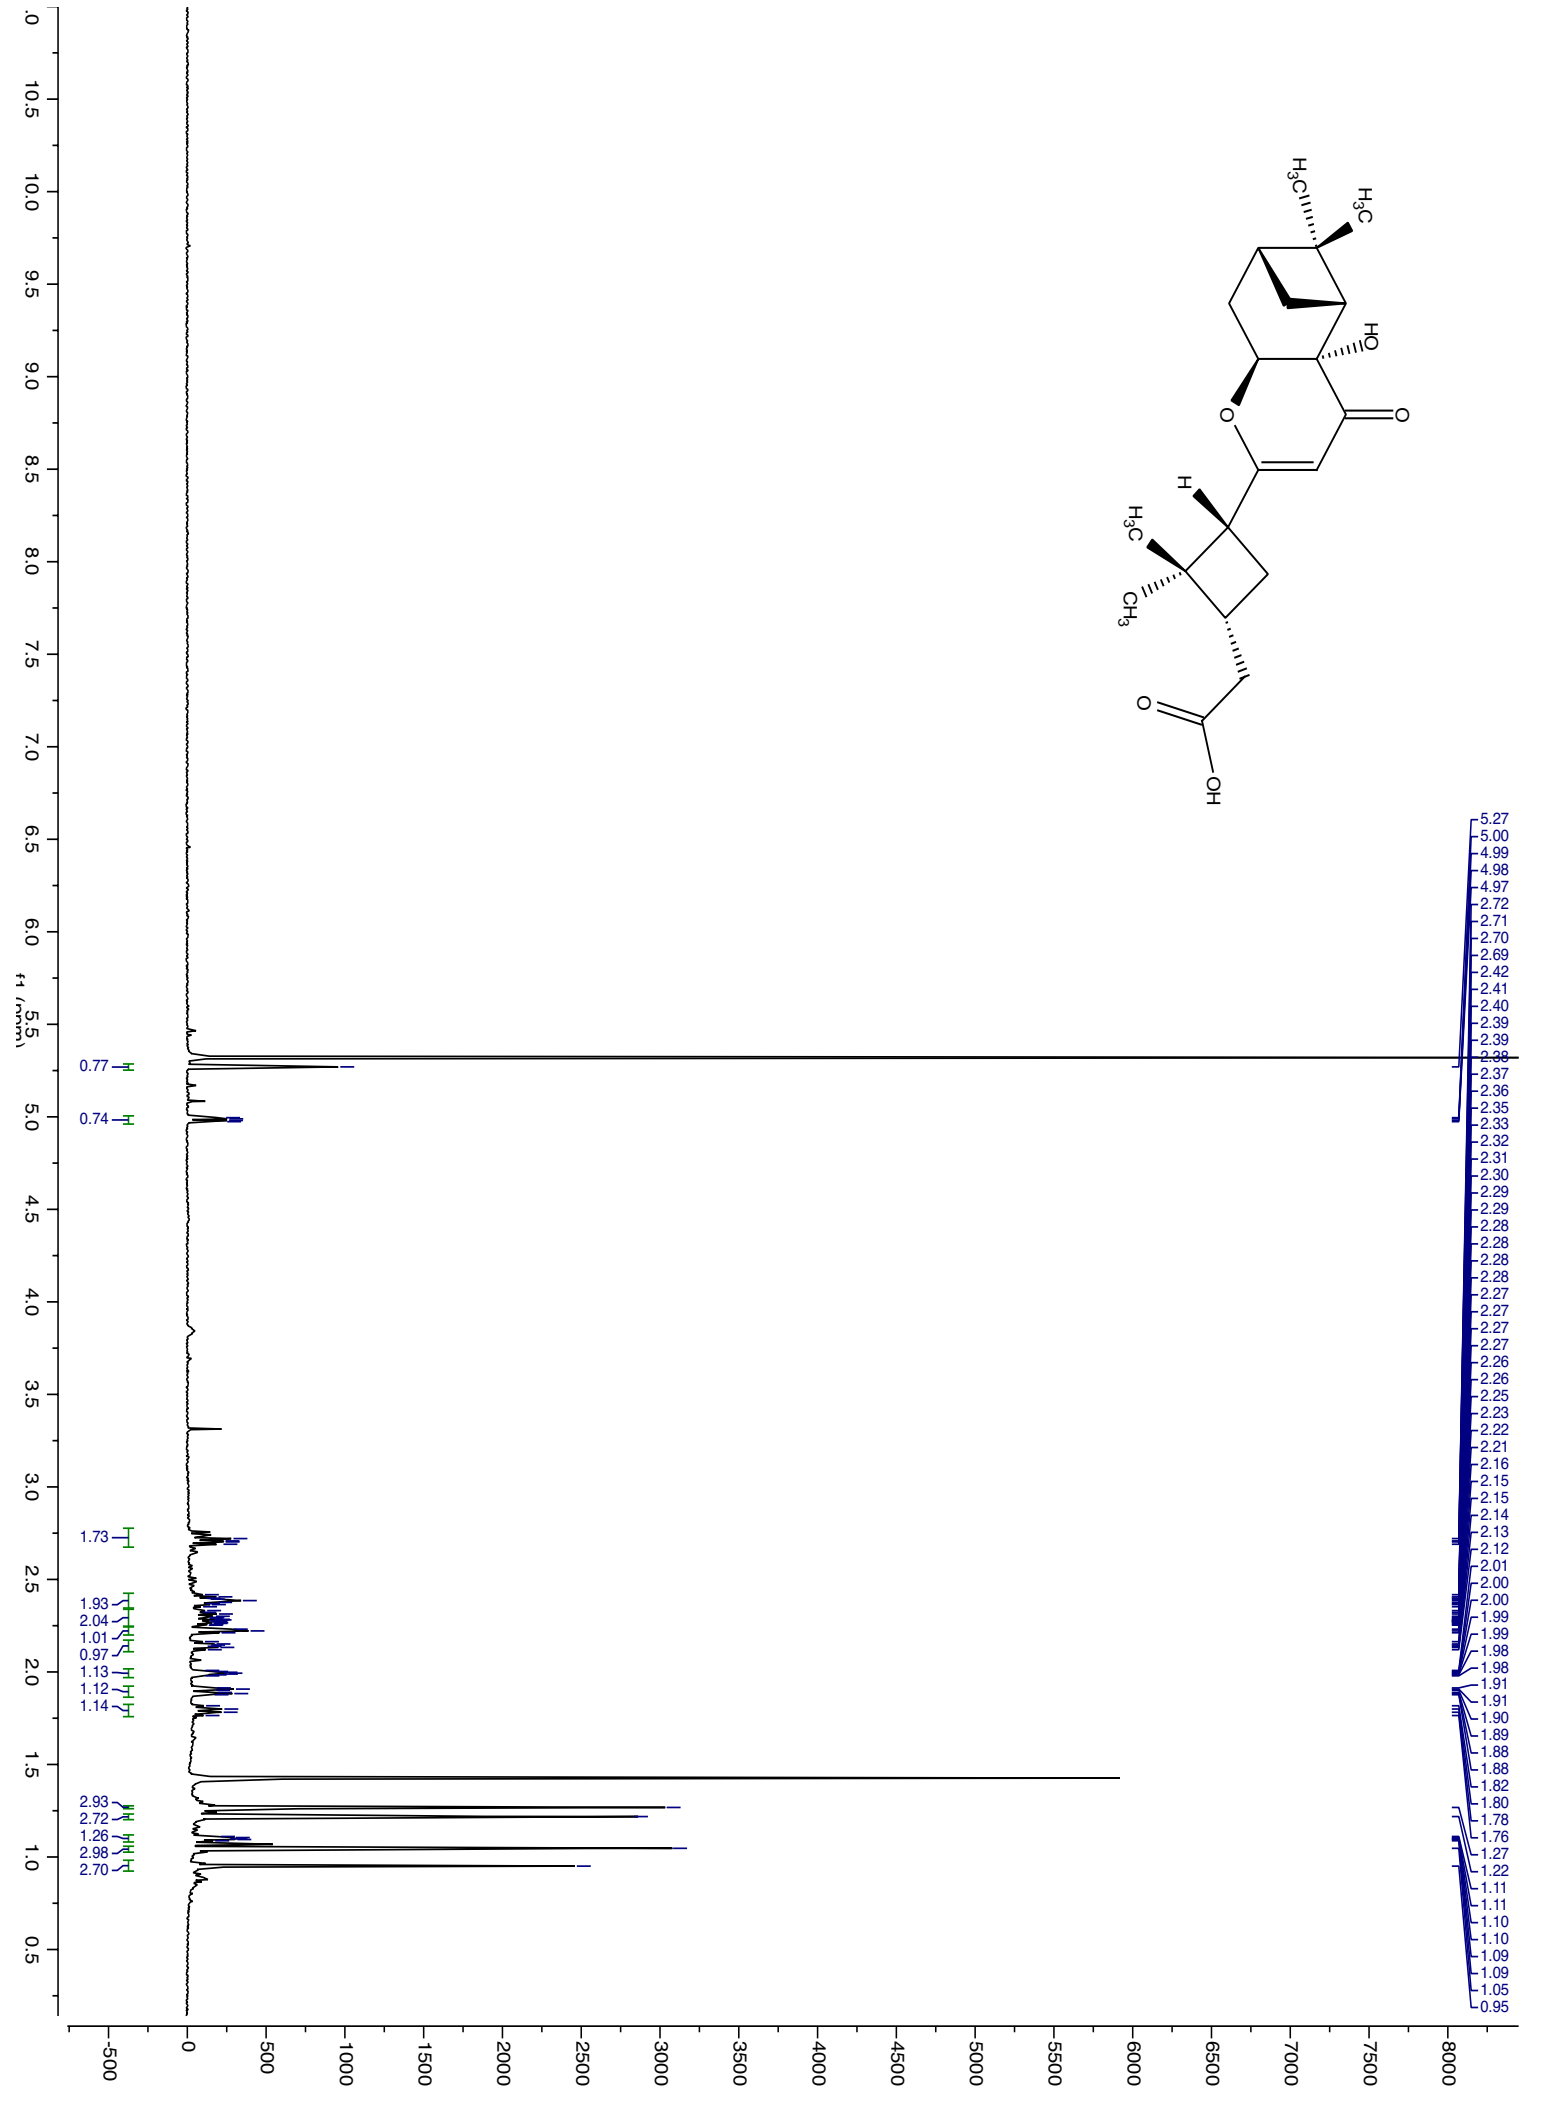

Supplement: ja502208z_si_005.pdf [file ja502208z_si_005.pdf]
